# Supplementary material for: An Efficient Implementation of the Nwat-MMGBSA Method to Rescore Docking Results in Medium-Throughput Virtual Screenings
Source: PubMed Central journal article supplement (PMC5844977; doi:10.3389/fchem.2018.00043), 2018-03-05
Supplement: DataSheet1.pdf [file DataSheet1.pdf]

## **An Efficient Implementation of the Nwat-MMGBSA Method to Rescore Docking Results in Medium-Throughput Virtual Screenings**

Irene Maffucci, Xiao Hu, Valentina Fumagalli and Alessandro Contini\*

\* **Correspondence:** Corresponding Author: [alessandro.contini@unimi.it](mailto:alessandro.contini@unimi.it)

### **1 Supplementary Figures and Tables**

|                                                                                                                                                                               |     |
|-------------------------------------------------------------------------------------------------------------------------------------------------------------------------------|-----|
| Figure S1-S3. Penicillopepsin, HIV1-protease and BCL-X <sub>L</sub> ligands.                                                                                                  | S2  |
| Table S1. HIV1-protease complexes with related mutations.                                                                                                                     | S3  |
| Table S2. Database of compounds evaluated in the AmpC VS (SMILES)                                                                                                             | S4  |
| Table S3. Database of compounds evaluated in the Rac1 VS (SMILES)                                                                                                             | S13 |
| Tables S4-S15. Predicted binding energies of for penicillopepsin ligands.                                                                                                     | S16 |
| Tables S16-S27. Predicted binding energies for HIV1-protease ligands.                                                                                                         | S20 |
| Tables S28-S39. Predicted binding energies for BCL-X <sub>L</sub> ligands                                                                                                     | S26 |
| Tables S40-S42. Correlation values between experimental data and Nwat-MMGBSA predicted binding energies obtained for penicillopepsin, HIV1-protease and BCL- X <sub>L</sub> . | S30 |
| Table S43. Statistical analyses                                                                                                                                               | S32 |
| Tables S44-S45. Water mediated H-bonds for 3NUO and 3NDW with Nwat = 10 and 70.                                                                                               | S34 |
| Figure S4-S11. RMSD of the backbone atoms from the starting coordinates for MD simulations of penicillipepsin, HIV1 protease and BCL-X <sub>L</sub>                           | S35 |
| Figure S12. Comparison of the ROC AUCs obtained from the AmpC VS with or without including the crystallographic water molecule                                                | S42 |
| Figure S13. Correlations between the binding energies computed for AmpC β-lactamase by Nwat-MMGBSA with Nwat = 30 and with Nwat = 60 (results of two independent runs)        | S43 |
| Figure S14. Rac1 Docked poses of the active compounds                                                                                                                         | S43 |
| Figure S15. ROC AUCs obtained from the two repetitions of the AmpC VS                                                                                                         | S44 |
| Figure S16. ROC AUCs obtained from the three repetitions of the Rac1 VS                                                                                                       | S44 |
| Figures S17-S18. Predicted binding poses for AmpC decoys ligand088 and ligand179                                                                                              | S45 |
| Tables S46-S47. Docking scores and Nwat-MMGBSA binding energies for AmpC VS                                                                                                   | S47 |
| Tables S48-S50. Docking scores and Nwat-MMGBSA binding energies for Rac1 VS                                                                                                   | S68 |

### **2 Supplementary Data**

All the scripts, input files and parameters to reproduce the calculations described in this article, together with working tutorials, are provided as a separate zip file. Questions regarding the use of the scripts can be addressed to [alessandro.contini@unimi.it](mailto:alessandro.contini@unimi.it)

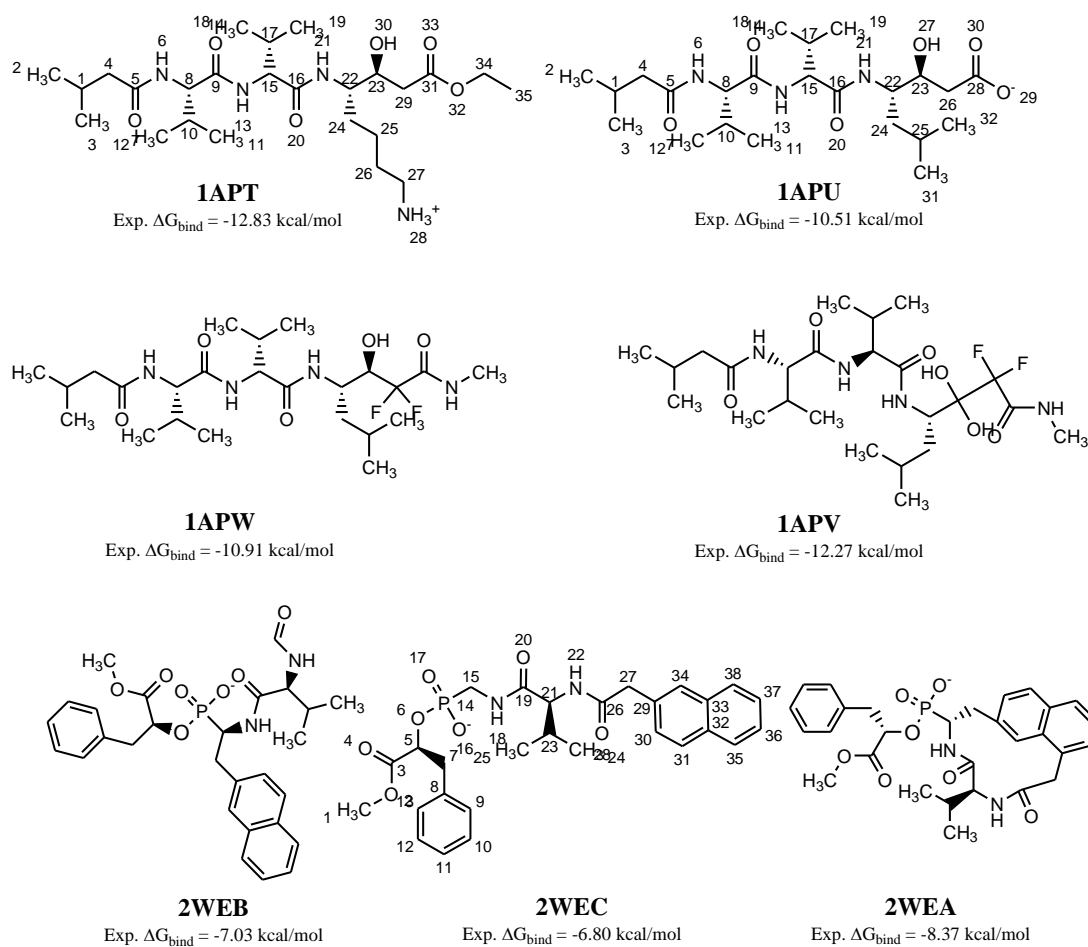

Figure S1. Penicillopepsin ligands with experimental  $\Delta G_{\text{bind}}$  at the protonation states considered for the analysis.

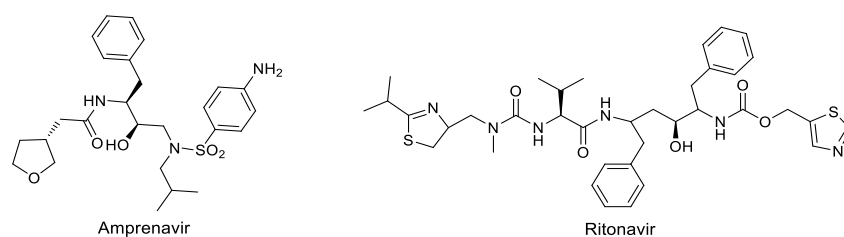

Figure S2. HIV1-protease ligands.

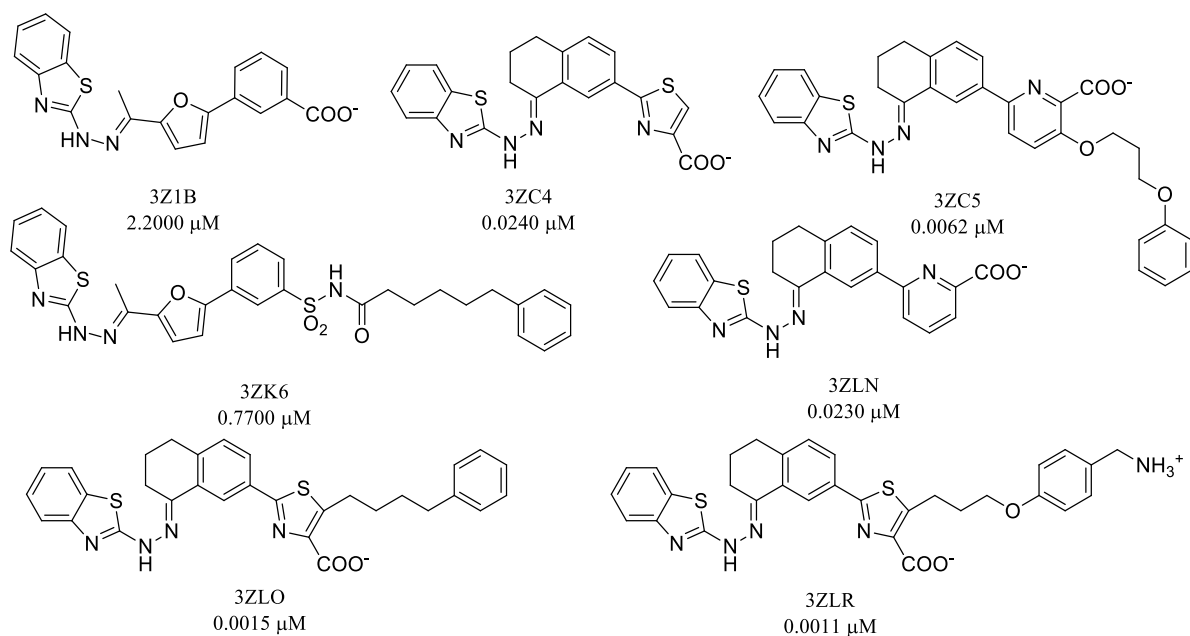Figure S3. BCL-XL ligands with experimental  $IC_{50}$  at the protonation states considered for the analysis.Table S1. HIV1-protease complexes with related mutations and  $k_i$  values (APV= amprenavir, RTV = ritonavir).

| Complex | Mutation  | Ligand | $k_i$ (nM) |
|---------|-----------|--------|------------|
| 3NU3    | Wild type | APV    | 0.150      |
| 3NU4    | V32I      | APV    | 1.500      |
| 3NU5    | I50V      | APV    | 4.500      |
| 3NU6    | I54M      | APV    | 0.500      |
| 3NUJ    | I54V      | APV    | 0.410      |
| 3NU9    | I84V      | APV    | 0.900      |
| 3NUO    | L90M      | APV    | 0.160      |
| 3NDW    | Q7K       | RTV    | 0.055      |
| 3NDX    | Q7K       | RTV    | 0.055      |

Table S2. Compounds used in the AmpC VS. Inactives are labelled as “0”, actives as “1”.

| Lig. # | Name      | Mol                                                       | activity |
|--------|-----------|-----------------------------------------------------------|----------|
| 1      | C05753705 | Clc1c([C@H](C(=O)[O-])CC(=O)[O-])ncc(C(F)(F)F)c1          | 0        |
| 2      | C52292858 | S=C1N([C@H]2[C@@H](C)C2)C(C)=N[N-]1                       | 0        |
| 3      | C45929952 | O=C([O-])c1c(C)c(OC)n(C)n1                                | 0        |
| 4      | C03871852 | O=C([O-])[C@@]1(C)[C@](C(=O)[O-])(C)[C@@H]2O[C@H]1CC2     | 0        |
| 5      | C04785749 | S=C1NC=Ne2c3c([nH]c12)ccc(F)c3                            | 0        |
| 6      | C64693634 | S(Cc1ccc(C)cc1)C1=NC(=O)CC(N)=N1                          | 0        |
| 7      | C71481946 | O=C1[C@]2(NC(=O)N1)c1c(C)cc(C)c1NCC2                      | 0        |
| 8      | C17920592 | Clc1c(N/C=C/2/C(C(F)(F)F)=NN\2=O)cccc1                    | 0        |
| 9      | C49033427 | Clc1c(N=NC2C(c3ncccc3)=NNC2=O)cccc1                       | 0        |
| 10     | C39280606 | S=C1N=C(N)C=2C(S[C@H]3C=2CCC3)=N1                         | 0        |
| 11     | C20581416 | S=C1SC(N[C@@H](C(C)C)C)=NN1                               | 0        |
| 12     | C18140608 | O=C1/C(=C\NCe2ccc(C)cc2)/C(C)=NN1                         | 0        |
| 13     | C53720869 | Clc1cc2c(O[C@H](C(=O)NOC)C2)cc1                           | 0        |
| 14     | C71606243 | S=C1C(F)C(=O)N=C(C)N1                                     | 0        |
| 15     | C65314490 | FC(F)(F)C(=O)/N=C/1\N2C(=NN\1)C=CC=C2                     | 0        |
| 16     | C13597626 | O=C1/C(=C\NCe2cncccc2)/C(C)=NN1                           | 0        |
| 17     | C17950920 | S=C1N=C(COC)CC(=O)N1                                      | 0        |
| 18     | C63110904 | O=C1NC(=O)c2c(C)nn(C)c2N1                                 | 0        |
| 19     | C16957825 | O=C1C=2C(=NN=C(N)NC=2)C[C@@H](C)C1                        | 0        |
| 20     | C34581412 | O=C1[C@@]2(C(=O)Nc3c2cccc3)NC(=O)N1                       | 0        |
| 21     | C21953365 | S(=O)(=O)/N=C/1\C(=O)CC=CN\1)C                            | 0        |
| 22     | C19851744 | ClC(Cl)(Cl)/C(=N/S(=O)(=O)C)/N                            | 0        |
| 23     | C69701096 | O=C(Nc1[nH]c(C(C)C)nn1)c1cn(-c2c(C)cccc2)nc1              | 0        |
| 24     | C41602804 | Fe1ccc(CNc2nc(O)c(Cc3occcc3)nn2)cc1                       | 0        |
| 25     | C17878675 | O=C(OCCCC)CN1C(=O)[C@](O)([C@@H]2C(=O)N=C(N)S2)c2c1cccc2  | 0        |
| 26     | C08726141 | Fe1ccc(-c2[nH]c(NC(=O)c3c(OC)cccc3)nn2)cc1                | 0        |
| 27     | C65044802 | Fe1c(CCC(=O)Nc2[nH]nc(-c3occcc3)n2)cc(F)cc1               | 0        |
| 28     | C67774090 | Fe1ccc(-c2[nH]c(NC(=O)/C(/C#N)=C/c3ccc(C)cc3)nn2)cc1      | 0        |
| 29     | C58510858 | O=C(Nc1[nH]cnn1)/C(/C#N)=C/c1c(C)n(c(C)c1)-c1ccc(C)cc1    | 0        |
| 30     | C66397636 | O=C(N[C@H](C#N)c1ccc(C(C)(C)C)cc1)C=1C(=O)NC(C)=CC=1      | 0        |
| 31     | C67660207 | FC(F)(F)c1[nH]c(NC(=O)/C=C/2oc([C@H]3[C@@H](C)C3)cc2)nn1  | 0        |
| 32     | C08116584 | Fe1ccc(-c2[nH]c(NC(=O)c3ccc(C#N)cc3)nn2)cc1               | 0        |
| 33     | C13409505 | O=C1N(C)c2c(C(=O)C1C=1/C(=C\c3c(O)cccc3)/C(=O)NN=1)cccc2  | 0        |
| 34     | C42605257 | Clc1cc(NC(=O)[C@H](Se2nc(C)[nH]n2)C)c(F)cc1               | 0        |
| 35     | C11340818 | S(CC(=O)N[C@@H](C)c1ccc(F)cc1)c1n[nH]cn1                  | 0        |
| 36     | C69774359 | Clc1n(C)nc(C)c1CSC1=Nc2[nH]ncc2C(=O)N1                    | 0        |
| 37     | C00129398 | S(CC(=O)Nc1c(F)cc(F)cc1)c1[nH]c2ncccc2n1                  | 0        |
| 38     | C05465784 | O=C1/C(=C(/C)c2c(O)ccc(C)c2)/C(=O)NC(=O)N1                | 0        |
| 39     | C65344544 | O=C1C(c2ccc(CO)cc2)=CNC(=O)N1                             | 0        |
| 40     | C44813136 | O=C(Nc1scnn1)[C@@H](C#N)C                                 | 0        |
| 41     | C20064359 | S=C1NC(=O)/C(=C\c2oc(-c3cc(C(=O)[O-])c(O)cc3)cc2)/C(=O)N1 | 0        |

|    |           |                                                                               |   |
|----|-----------|-------------------------------------------------------------------------------|---|
| 42 | C15012796 | Clc1cc(OC)c(O)c/C=C/2\C(=O)NC(=O)N\2)c1                                       | 0 |
| 43 | C71805141 | O=C(Nc1c(O)cccn1)c1cccc1                                                      | 0 |
| 44 | C36882145 | O(C)c1c(O)cc(C2=NC(=O)C=CN2)cc1                                               | 0 |
| 45 | C66322335 | O(C)c1c(O)ccc2N=C(C)NC(=O)c2c1                                                | 0 |
| 46 | C20344738 | O=C([O-])c1cc(C(=O)[O-])cc(-n2c(C)c/C=C\3/C(=O)NC(=O)N/3)cc2C)c1              | 0 |
| 47 | C04398438 | S(Cc1c(F)cccc1)c1n(Cc2ccccc2)c2C(=O)NN=C(O)c2n1                               | 0 |
| 48 | C08618899 | S(CCC(C)C)c1n(Cc2ccccc2)c2C(=O)NN=C(O)c2n1                                    | 0 |
| 49 | C71621468 | O=C(OCC)C1C(=O)N=C(N)S1                                                       | 0 |
| 50 | C06045573 | O=C/1N(c2ccccc2)N=C(O)\C\1=C\c1n(-c2cc3C(=O)NC(=O)c3cc2)ccc1                  | 0 |
| 51 | C62716729 | C(c1se2c([n+H]1)CCCCC2)c1nnn[n-]1                                             | 0 |
| 52 | C49591564 | O=C([O-])/C=C/c1ccc(CN(C(=O)c2[nH]ccc2)C)cc1                                  | 0 |
| 53 | C37657769 | S(=O)(=O)(Nc1cc(C#CCO)ccc1)C(C)C                                              | 0 |
| 54 | C57534217 | S(=O)(=O)(Nc1cc(C)cc(C)c1)CCCO                                                | 0 |
| 55 | C71519308 | S(=O)(=O)(NO)c1c(C)cc(C)c(C)c1                                                | 0 |
| 56 | C00235891 | O=C1C2=N/C(=C\Nc3c(O)cccc3)/C=CC2=CC=C1                                       | 0 |
| 57 | C37552662 | S(=O)(=O)(Nc1c(F)cc(C#CCO)cc1)N1CCCC1                                         | 0 |
| 58 | C41721189 | O=C/N=C\1/SC=C(C(C)C)N/1)/C/C#N)=C\c1ccc(O)cc1                                | 0 |
| 59 | C37577510 | S(=O)(=O)(N=C\1/NOC(C)=C/1)c1c(C#CCO)cc(C)cc1                                 | 0 |
| 60 | C19837149 | Clc1c(O)ccc(C(=O)NCCOC)c1                                                     | 0 |
| 61 | C00249507 | O(C)c1cccc([C@@H]2NN/C(=C\3/C(=O)c4c(C/3=O)cccc4)/C2)cc1                      | 0 |
| 62 | C37549660 | O=C(Nc1sc(C#CCCO)cn1)c1n(CC)ccc1                                              | 0 |
| 63 | C37552353 | S(=O)(=O)(N=C\1\SC(C#CCO)=CN\1)N1[C@H](C)CCCC1                                | 0 |
| 64 | C20709644 | O=[N+](([O-])c1cc([C@H]2Nc3c(C(=O)N(C)C4CCCC4)cccc3[C@H]3[C@@H]2CC=C3)c(O)cc1 | 0 |
| 65 | C36927218 | Clc1c(C)c(N2C(=O)C([O-])=NC2=O)ccc1                                           | 0 |
| 66 | C55303393 | O=C1Oe2c(N1)ccc([C@H](O)[C@H]1OCCOC1)c2                                       | 0 |
| 67 | C49575329 | S=C1SC(NCC[N+H]2CCCCC2)=NN1                                                   | 0 |
| 68 | C54128923 | S=C1SC(NCC[N+H](C(C)C)C)=NN1                                                  | 0 |
| 69 | C65341679 | S(=O)(=O)(Nc1cc(-c2cc(O)c(C#N)cc2)ccc1)C                                      | 0 |
| 70 | C37395041 | O=C(Nc1senn1)C[N+H2]C1CC1                                                     | 0 |
| 71 | C49660525 | O=C1N(CC)c2nc(N)sc2C(=O)N1                                                    | 0 |
| 72 | C11919853 | O=C1NN=C(c2sccc2)c2sc(N)nc12                                                  | 0 |
| 73 | C05211034 | S([C@@H](C(=O)NC1CC1)C)c1nc(-c2ccc(C)cc2)[nH]n1                               | 0 |
| 74 | C67284644 | Clc1cc(Nc2c(C(=O)N3CCSCC3)[nH]nn2)ccc1                                        | 0 |
| 75 | C12506010 | FC(F)(F)[C@]1(O)C(=O)N/C(=C/C(=O)OCC)/C1                                      | 0 |
| 76 | C48505853 | Brc1cc(C/[O-])=N\S(=O)(=O)CCCC[nH]c1                                          | 0 |
| 77 | C69675862 | S(=O)(=O)(N=C\1/NC=C(F)C=C/1)c1c2c([nH]c1)nc2c2                               | 0 |
| 78 | C70131456 | S(=O)(=O)(C([C@H](O)c1cc2OC(=O)Nc2cc1)(C)C)C                                  | 0 |
| 79 | C05999572 | S([C@@H](C(=O)Nc1[nH]cnn1)c1cccc1)c1cccc1                                     | 0 |
| 80 | C63473443 | O(C)c1cccc([C@@H]2NC(=O)c3n[nH]c(-c4sccc4)c23)cc1                             | 0 |
| 81 | C44926420 | O(C)[C@@H]1[C@H]([N+H2])[C@H](C)c2nnn[n-]2)CCCC1                              | 0 |
| 82 | C69582423 | FC(F)(F)c1[nH]c(NC(=O)c2n(C)nc(C(C)C)c2)nn1                                   | 0 |
| 83 | C35739677 | S=C1N([C@H](C)c2occc2)N=N[N-]1                                                | 0 |
| 84 | C39113249 | O=C1[N-]c2onc(C)c2C(=O)C1                                                     | 0 |

|     |           |                                                              |   |
|-----|-----------|--------------------------------------------------------------|---|
| 85  | C21079621 | ClC=1C(=O)/C(=C\NNc2[nH]c(SCCOC)nn2)/C=C(Cl)C=1              | 0 |
| 86  | C00124470 | S(C)C1=C(C#N)[C@@](O)(c2sccc2)N=C(C(F)(F)F)N1                | 0 |
| 87  | C36748156 | S(=O)([O-])(=NNC(=O)CC(C)C)c1cc([N+](=O)[O-])c(O)cc1         | 0 |
| 88  | C22591123 | P(=O)([O-])([O-])[C@@]1(C)P(=O)([O-])Oc2c1cccc2              | 0 |
| 89  | C40176456 | O=C1NC(=O)c2n3C(=O)C=Cc3nc2N1                                | 0 |
| 90  | C61591519 | S=C1N(c2c(C)cccc2)C(=O)[N-][N-]1                             | 0 |
| 91  | C12176818 | S=C1S/C(=C/Nc2sccn2)/C(=O)[N-]1                              | 0 |
| 92  | C17992321 | S=C1NC(=O)/C(=C\c2oc(-c3c(O)ccc([N+](=O)[O-])c3)cc2)/C(=O)N1 | 0 |
| 93  | C43479560 | Clc1c(O)ccc(CNc2c(-n3nccc3)nccc2)c1                          | 0 |
| 94  | C48416362 | O=C(N[C@@H](C)c1cnccc1)c1nnc(O)cc1                           | 0 |
| 95  | C70419275 | Clc1c(NS(=O)(=O)c2nc(CC)[nH]c2)ccc(F)c1                      | 0 |
| 96  | C48733940 | Fe1ccc([C@H](CC(=O)Nc2[nH]cnn2)C)cc1                         | 0 |
| 97  | C68949934 | O=C(Nc1[nH]cnn1)CC[C@@H]1OCCCC1                              | 0 |
| 98  | C03457151 | Clc1ccc(C)c(OCC2=N[N-]C(=S)N2)cc1                            | 0 |
| 99  | C35409733 | Fe1c(O)c(F)c(C(=O)N[C@H](C(=O)[O-])CC)cc1F                   | 0 |
| 100 | C52005052 | O=C([O-])/C=C/C(=O)N[C@@H]1[C@@H](O)CCCC1                    | 0 |
| 101 | C71165866 | O=C([O-])/C(=C(\C(=O)N[C@@]1(CO)C[C@@H](C)CCC1)/C)/C         | 0 |
| 102 | C04784407 | S=C1n2nc(O)cc2N=C(c2c(F)cccc2)N1                             | 0 |
| 103 | C42514979 | O=C(N(CCO)C1CCCC1)C=1N=CC(=O)NC=1                            | 0 |
| 104 | C70886803 | O=C(N[C@@](CO)(CC)C)C=1N=CC(=O)NC=1                          | 0 |
| 105 | C43751384 | Clc1nccc(C(=O)Nc2[nH]c(C(F)(F)F)nn2)c1                       | 0 |
| 106 | C08619782 | S=C1N(c2c(F)cccc2)C(=O)c2c([nH]nc2)N1                        | 0 |
| 107 | C48794375 | Brc1cc(NC(=O)CSc2[nH]cn2)c(C)cc1                             | 0 |
| 108 | C23141138 | O=C(Nc1n[nH]cn1)[C@@H]1Sc2c(cccc2)C1                         | 0 |
| 109 | C71766630 | Clc1c(O/C=C/2)OC([O-])=NN2)ccc(Cl)c1                         | 0 |
| 110 | C45136139 | S=C1N(C[C@H]2C[N+H](C(C)C)CC2)N=N[N-]1                       | 0 |
| 111 | C58332804 | Clc1c(C(=O)Nc2[nH]c(C(C)C)nn2)cc(Cl)s1                       | 0 |
| 112 | C49474190 | S=C1[N-][N+H]=C(c2ccc(C)cc2)N[N-]1                           | 0 |
| 113 | C05945177 | S(SC1=NNC(=S)C=C1)C1=NNC(=S)C=C1                             | 0 |
| 114 | C69055083 | Fe1c(O)c(F)c(C(=O)NOCC(=O)[O-])cc1F                          | 0 |
| 115 | C37405181 | O=C1c2c(NN=C1)cc1OCOc1c2                                     | 0 |
| 116 | C04878981 | O=C([O-])c1c(C(=O)C)c(C)c(C(=O)[O-])[nH]1                    | 0 |
| 117 | C20583359 | S=C1N([C@H]2CS(=O)(=O)CC2)C=N[N-]1                           | 0 |
| 118 | C49450205 | Fe1c(C(=O)Nc2[nH]c(CC)c2)c(O)cc(F)c1                         | 0 |
| 119 | C39334766 | [N+H3][C@H]1[C@@H](c2nnn[n-]2)C2=C(S1)CCCC2                  | 0 |
| 120 | C62716726 | C(c1sc2c([n+H]1)CC[N+H2]C2)c1nnn[n-]1                        | 0 |
| 121 | C71467882 | O=C1n2nc(-c3ccc(C)cc3)cc2N=C(C[N+H3])C1                      | 0 |
| 122 | C51989901 | Clc1c(O)ccc(C(=O)N[C@@H]2[C@@H](O)CCCC2)c1                   | 0 |
| 123 | C66584053 | S(=O)(=O)(Nc1c2[nH]c2c(C)cc1)C1CCCCC1                        | 0 |
| 124 | C26465236 | O=C(NCCCC)/C(=N\O-)/C#N                                      | 0 |
| 125 | C49913910 | S(=O)(=O)(N[C@H](C#N)c1c(C)cccc1)c1c(C)[nH]nc1C              | 0 |
| 126 | C03106116 | O=C([O-])/C(=C/C(=O)NN(C)C)/C                                | 0 |
| 127 | C48996328 | O=C(N1[C@@H](C(=O)[O-])C[C@@H](O)C1)N1CC[N+H](C2CC2)CC1      | 0 |

|     |           |                                                                      |   |
|-----|-----------|----------------------------------------------------------------------|---|
| 128 | C46091078 | O=C(N[C@](C#N)(C(C)C)C)[C@H](C)[N+H]1CCC(CO)CC1                      | 0 |
| 129 | C70416995 | S(=O)(=O)(N1[C@H](c2[nH]ccc2)CCC1)c1nc[nH]c1                         | 0 |
| 130 | C35015891 | O=C1C2([N+H2])[C@H](c3occc3)N1)CCCC2                                 | 0 |
| 131 | C70681329 | S=C1N(C[C@H]2NC(=O)CC2)C=N[N-]1                                      | 0 |
| 132 | C71467902 | O=C1n2nc(-c3occc3)cc2N=C(C[N+H3])C1                                  | 0 |
| 133 | C06073484 | O=C([O-])C1=NC=2N(C(=O)C3=C(N=2)CCC3)N1                              | 0 |
| 134 | C01728517 | S=C(N=N/C=C\1/NC=CC=C/1)N=NCc1cccc1                                  | 0 |
| 135 | C69971460 | O=C(N1C[C@H](C[N+H]2CCOCC2)CCC1)c1c(O)ccc(C(C)C)c1                   | 0 |
| 136 | C17326685 | S=C1NC(=O)C2NC(=O)C(=O)N=C2N1                                        | 0 |
| 137 | C44931991 | Nc1c2c(ccc1)C[N+H]([C@H](C)c1nn[n-]1)C2                              | 0 |
| 138 | C18189761 | N#C/N=C/N[C@H](C(C)(C)C)\Nc1cc[n+H]cc1                               | 0 |
| 139 | C19359254 | O=C([O-])c1oc(C[N+H]2CC[N+H](Cc3oc(C(=O)[O-])cc3)CC2)cc1             | 0 |
| 140 | C17078663 | S(=O)([O-])(=N/[N+H]=C(/C)c1c(O)c2c(cc1)cccc2)c1cc([N+](=O)[O-])ccc1 | 0 |
| 141 | C18124909 | FC(F)(F)/C/[O-]=N\c1[nH]c(-c2[nH]nc(NC(=O)C(F)F)n2)nn1               | 0 |
| 142 | C39302923 | S(=O)(=O)([O-])[C@@]12C(C)(C)[C@@H](CC1=O)CC2                        | 0 |
| 143 | C21993392 | [PH](=O)([O-])CC                                                     | 0 |
| 144 | C04878318 | BrC=1C(=O)NNC=1C                                                     | 0 |
| 145 | C44496437 | S[C@H](C)c1cn(C)nc1                                                  | 0 |
| 146 | C08116500 | Fc1ccc(-c2[nH]c(NC(=O)/C=C/c3occc3)nn2)cc1                           | 0 |
| 147 | C69742907 | Fc1c(C(=O)Nc2[nH]cnn2)ccc(-c2ccc(F)cc2)c1                            | 0 |
| 148 | C62869418 | Brc1cc(O)c(C(=O)N2C[C@](C(=O)[O-])(C)CCC2)cc1                        | 0 |
| 149 | C52266754 | O=C([O-])C(C)(C)[C@@]1(O)[C@H](C)CCCC1                               | 0 |
| 150 | C41291510 | Clc1cc(C)c(OC[C@H](O)CC(=O)[O-])cc1                                  | 0 |
| 151 | C04362873 | SCC(O)CS                                                             | 0 |
| 152 | C26440976 | ClCCCc1c(O)nc(C(F)F)nc1O                                             | 0 |
| 153 | C54930868 | Oc1nnc2c(c1)CSCC2                                                    | 0 |
| 154 | C36533270 | Oc1c2c(n(C)nc2)ccc1                                                  | 0 |
| 155 | C51002199 | Brc1c(O)c(Br)cc(/C=C(\C#N)/c2[nH]c3c(n2)ccc(C)c3)c1                  | 0 |
| 156 | C29546673 | Clc1c(C2=C(C#N)C(=O)NC(c3c(O)cccc3)=C2)cccc1                         | 0 |
| 157 | C38864543 | FC(F)C=1NC(=O)C=CC=1                                                 | 0 |
| 158 | C37154404 | S([C@H]1[C@@H](C#N)CC[C@H](C)C1)c1n[nH]cn1                           | 0 |
| 159 | C04149778 | ClCCCSc1ncnc2nc[nH]c12                                               | 0 |
| 160 | C69947966 | S(=O)(=O)(N1CCSCC1)c1nc[nH]c1                                        | 0 |
| 161 | C41669608 | OCCN(CC)c1nc2c(O)cccc2cc1                                            | 0 |
| 162 | C20233592 | Oc1nc(-c2ccc(-c3[nH]nc3)cc2)nc1                                      | 0 |
| 163 | C28164987 | S(Cc1[nH]nc(O)c1)c1nc(C)nc2sc(CC)cc12                                | 0 |
| 164 | C06094144 | O=C1c2c(O)cc(O)cc2Oc1cc(O)cc2                                        | 0 |
| 165 | C00091681 | S(Cc1[nH]nc(O)c1)c1cccc1                                             | 0 |
| 166 | C64218986 | O=C1[C@H](c2cc(O)c(O)cc2)Oc2c(O)c(C)ccc12                            | 0 |
| 167 | C44496871 | Oc1nnc(-c2cn(C)nc2)cc1                                               | 0 |
| 168 | C20158895 | S=C1N(N)C(=O)C(c2ccc(C)cc2)N=N1                                      | 0 |
| 169 | C41600921 | Oc1nc(N2C[C@H](C)C[C@H](C)C2)nn1                                     | 0 |
| 170 | C51036757 | S(CC(=O)c1c(O)ccc(F)c1)c1ncnc2[nH]cnc12                              | 0 |

|     |           |                                                                       |   |
|-----|-----------|-----------------------------------------------------------------------|---|
| 171 | C18164784 | c1(-c2cnccc2)[nH]c(-c2cnccc2)nn1                                      | 0 |
| 172 | C59457502 | S(C(F)(F)C(=O)[O-])c1[nH]c2c(n1)ccc([N+](=O)[O-])c2                   | 0 |
| 173 | C06493998 | O=C1C(c2cccc2)=CC(C#N)=C([O-])N1                                      | 0 |
| 174 | C06413535 | O=C([O-])[C@@]1(C)C(C)(C)[C@@H](c2[nH]c3c(n2)cc(C)cc3)CC1             | 0 |
| 175 | C50213781 | O=C([O-])c1c(C(C)(C)C)n(CCO)nn1                                       | 0 |
| 176 | C00120763 | S=C1N(c2cc(F)ccc2)C(O)=N[N-]1                                         | 0 |
| 177 | C13126405 | O(C)c1cc(O)c(-c2n[nH]c(-c3cccc3)c2)cc1                                | 0 |
| 178 | C03160614 | O=C1/C(=C/e2c(O)cc(O)cc2)/SC(=O)[N-]1                                 | 0 |
| 179 | C13678569 | P(=O)([O-])([O-])C(P(=O)([O-])([O-])(O)Cc1cc(C2=CNC(=O)C=C2)ccc1      | 0 |
| 180 | C51394017 | S(C[C@H]1O[C@H](C(=O)[O-])CC1)c1n[nH]cn1                              | 0 |
| 181 | C69899369 | O=C([O-])[C@H](C(C)C)[C@@]1(O)C[C@@H](C)OCC1                          | 0 |
| 182 | C17878987 | O=C1N(Cc2sccc2)c2c([C@@]1(O)[C@@H]1C(=O)N=C(N)S1)cccc2                | 0 |
| 183 | C06021875 | S=C1SC(NC(=O)C2CC2)=NN1                                               | 0 |
| 184 | C40258948 | Clc1ccc([C@@H](O)c2cc3OC(=O)Nc3cc2)cc1                                | 0 |
| 185 | C08927444 | Clc1c(Nc2nc(O)c(C)nn2)cccc1                                           | 0 |
| 186 | C41601460 | Oc1c(Cc2sccc2)nnc(NCC)n1                                              | 0 |
| 187 | C37190308 | S(CC=1OC=C(O)C(=O)C=1)c1c(N)ccn1                                      | 0 |
| 188 | C08830348 | O=C1S/C(=C/e2cccc(O)cc2)/C(N)=N1                                      | 0 |
| 189 | C50007182 | O=C(Nc1nc(-c2sc(C)cc2)[nH]n1)Cc1c(C)cccc1                             | 0 |
| 190 | C71289372 | Clc1cc2NC(=S)N(N)C(=O)c2cc1                                           | 0 |
| 191 | C50290339 | O=C([O-])C1(C(=O)NC2CCC(O)CC2)CCCC1                                   | 0 |
| 192 | C50290341 | O=C([O-])C1(C(=O)NC2CCC(O)CC2)CC1                                     | 0 |
| 193 | C19874316 | Oc1c(-c2sc(N)nn2)cc(C)cc1                                             | 0 |
| 194 | C19874341 | Clc1c(O)cccc(-c2sc(N)nn2)c1                                           | 0 |
| 195 | C13647098 | Br1c(O)c(/C=N\NC(=O)C23C[C@@H]4CC(C2)C[C@H](C3)CC4)cc([N+](=O)[O-])c1 | 0 |
| 196 | C65355706 | Fe1cc(O)cc(C=2NC=CC(=O)C=2)c1                                         | 0 |
| 197 | C65589724 | Clc1c(O)cccc(/C=C/e2sc(C(=O)NC)cn2)c1                                 | 0 |
| 198 | C37070726 | Clc1cc(CNc2c(OC)nccc2)c(O)cc1                                         | 0 |
| 199 | C19836520 | Clc1c(O)cccc(C(=O)NCC#C)c1                                            | 0 |
| 200 | C19838389 | O=C(NCCCC)c1ccc(O)cc1                                                 | 0 |
| 201 | C11565189 | O=C1C=C(N[C@@H](CO)CC)CCCC1                                           | 0 |
| 202 | C19885521 | Clc1cc(C[N+H2]CC(=O)OC)c(O)cc1                                        | 0 |
| 203 | C49512110 | Clc1c([C@H](NC(=O)c2c(O)ccn2)C)cccc1                                  | 0 |
| 204 | C32575643 | S(=O)(=O)(N=NCc1[nH]ccc1)c1cc2c(cc1)cccc2                             | 0 |
| 205 | C44490973 | Br1cc(O)c(C(=O)N(CC(=O)NC)CC)cc1                                      | 0 |
| 206 | C54370013 | O=C(N1[C@H](C)C[N+H2]CC1)c1c(O)cc(OC)cc1                              | 0 |
| 207 | C63749024 | O=C(N)CN(C(=O)c1c(O)cc(C(C)C)cc1)C                                    | 0 |
| 208 | C61684500 | S(=O)(=O)(/N=C/1\NOC=C\1)c1ccc(C#CCO)cc1                              | 0 |
| 209 | C41652487 | O=C(C)c1cc(OCC)c(O)c(N)c1                                             | 0 |
| 210 | C56701362 | S=C(N=NCc1c(O)cccc1)NC                                                | 0 |
| 211 | C19205478 | Oc1c(-c2[n+](O-])c(CCCC)c(-c3cccc3)[nH]2)cccc1                        | 0 |
| 212 | C35522837 | S(C(C)C)c1nc(-c2sccc2)[nH]n1                                          | 0 |
| 213 | C12921808 | O=C(Nc1[nH]c(-c2ccc(C)cc2)nn1)C1CC1                                   | 0 |



|     |           |                                                                         |   |
|-----|-----------|-------------------------------------------------------------------------|---|
| 214 | C28681289 | <chem>Fc1ccc(-c2[nH]c(NC(=O)CCC)nn2)cc1</chem>                          | 0 |
| 215 | C20390511 | <chem>Oc1c([C@H]2NN=C(c3oc(C)cc3)C2)ccc(C)c1</chem>                     | 0 |
| 216 | C38007139 | <chem>S(=O)(=O)(NCc1c[nH]nc1)N1CCC(C)CC1</chem>                         | 0 |
| 217 | C65056746 | <chem>O=[N+](([O-])c1c2[nH]c(C(=O)Nc3[nH]c(-c4sccc4)nn3)cc2)ccc1</chem> | 0 |
| 218 | C70713045 | <chem>O=C([O-])[C@@](O)(COC1CCCCC1)C</chem>                             | 0 |
| 219 | C70713125 | <chem>Clc1c(C)cc(OC[C@@](O)(C(=O)[O-])C)cc1</chem>                      | 0 |
| 220 | C15015423 | <chem>S(C)c1nc(O)c(-c2c(N)cccc2)nn1</chem>                              | 0 |
| 221 | C66323443 | <chem>Br1[nH]c2c(Cl)nc(N)nc2c1</chem>                                   | 0 |
| 222 | C35686179 | <chem>Br1c(Br)c(NS(=O)(=O)CC)cc(Br)c1O</chem>                           | 0 |
| 223 | C05444066 | <chem>Br1ccc(CSc2[nH]c(NC(=O)C)nn2)cc1</chem>                           | 0 |
| 224 | C39189859 | <chem>O=NC1=C([O-])CCCC1</chem>                                         | 0 |
| 225 | C21596355 | <chem>S=C(NC(=O)C(C)C)Nc1c(O)cccc1</chem>                               | 0 |
| 226 | C70713271 | <chem>O=C([O-])[C@@](O)(COc1cnc1)C</chem>                               | 0 |
| 227 | C71121726 | <chem>FC(F)(F)c1[nH]c(NC(=O)[C@@H](OC2CCCC2)C)nn1</chem>                | 0 |
| 228 | C69559766 | <chem>Clc1cc(Cl)cc(O[C@@H](C(=O)Nc2[nH]cnn2)C)c1</chem>                 | 0 |
| 229 | C65336480 | <chem>SC=1N=N[C@H](C)C=1</chem>                                         | 0 |
| 230 | C08251247 | <chem>O=C1SCC(=O)C1</chem>                                              | 0 |
| 231 | C32627807 | <chem>[O-]/[N+H]=C/1/[C@H]2[N+H](CC1)CCC2</chem>                        | 0 |
| 232 | C49398945 | <chem>FC(F)(F)c1nc(NC(=O)[C@H]2[C@@H](c3occc3)C2)[nH]n1</chem>          | 0 |
| 233 | C05226028 | <chem>S=C1SC=NN1</chem>                                                 | 0 |
| 234 | C71166685 | <chem>Fc1c(F)cc(-c2[nH]c3c(n2)ccnc3)c(N)c1</chem>                       | 0 |
| 235 | C42013436 | <chem>FC(F)(F)Cc1[nH]c(-c2ccccc2)nn1</chem>                             | 0 |
| 236 | C04311295 | <chem>Br1c([N+](=O)[O-])nc(C)[nH]1</chem>                               | 0 |
| 237 | C26423248 | <chem>S=C1NC=Nc2n(C)nnc12</chem>                                        | 0 |
| 238 | C04730747 | <chem>S=C1NC=2C(=O)N(C)C(=O)NC=2N1</chem>                               | 0 |
| 239 | C57307439 | <chem>FC(F)(F)c1nc(NC(=O)[C@H](OC)C)[nH]n1</chem>                       | 0 |
| 240 | C15924556 | <chem>O=C(C)c1c(O)c([C@@H](CC)C)[nH]c1O</chem>                          | 0 |
| 241 | C06796039 | <chem>S=C(N)N1C(=O)C(N=O)C(C)=N1</chem>                                 | 0 |
| 242 | C01530958 | <chem>ClC(Cl)(Cl)[C@H](P(=O)(OC)OC)O</chem>                             | 0 |
| 243 | C37128358 | <chem>Clc1cc(CNc2ccc(-n3nccn3)cc2)c(O)cc1</chem>                        | 0 |
| 244 | C66054661 | <chem>Br1ccc(-c2c(O)c(C(=O)OCC)n[nH]2)cc1</chem>                        | 0 |
| 245 | C20089055 | <chem>O=C1NN=C(O)c2c1c(NC[C@@H](CC)C)ccc2</chem>                        | 0 |
| 246 | C68880138 | <chem>FC(F)(F)[C@H](O)COc1ccc(CC#N)cc1</chem>                           | 0 |
| 247 | C35201112 | <chem>Clc1c(Cl)cc(C(=O)NCCCO)[nH]1</chem>                               | 0 |
| 248 | C04244998 | <chem>N#C/N=C/Nc1ccc(-c2ccc(N/C=N/C#N)cc2)cc1</chem>                    | 0 |
| 249 | C35279647 | <chem>O=C([O-])[C@]12C(C)(C)[C@](C)(/C(=N\N)/C1)CC2</chem>              | 0 |
| 250 | C16857803 | <chem>S=C1NC(=O)C(N=O)C(=O)N1</chem>                                    | 0 |
| 251 | C05046420 | <chem>ClC[C@H](O)COP(=O)([O-])[O-]</chem>                               | 0 |
| 252 | C55161009 | <chem>O=C1C(O)=CCS1</chem>                                              | 0 |
| 253 | C19690527 | <chem>O=[N+](([O-])c1c(O)cccc1O</chem>                                  | 0 |
| 254 | C43683180 | <chem>S(Cc1sc(C#CCO)cc1)c1n[nH]cn1</chem>                               | 0 |
| 255 | C59649067 | <chem>Clc1c(C=O)cn[nH]1</chem>                                          | 0 |
| 256 | C49181670 | <chem>O=C1O[C@@](O)(C)C=2O[C@H](/C=C/C)[C@@H](O)[C@H](O)C1=2</chem>     | 0 |

|     |           |                                                                           |   |
|-----|-----------|---------------------------------------------------------------------------|---|
| 257 | C14827650 | <chem>O=C1N2C([C@@H](O)CC2)=Nc2c1cc(O)cc2</chem>                          | 0 |
| 258 | C58007344 | <chem>OCc1oc2c(n1)cc(O)cc2</chem>                                         | 0 |
| 259 | C05117309 | <chem>Oc1c(-c2[nH]c3c(n2)cncc3)cccc1</chem>                               | 0 |
| 260 | C40488325 | <chem>Oc1c(-c2[nH]c(CC)nn2)cccc1</chem>                                   | 0 |
| 261 | C37491034 | <chem>S([C@@H]1[C@H](O)CCCC1)c1n[nH]cn1</chem>                            | 0 |
| 262 | C50330892 | <chem>O[C@H]1c2sc(-c3n[nH]cn3)nc2CCC1</chem>                              | 0 |
| 263 | C19886021 | <chem>BrC1c(O)ccc([C@@H](c2c(C)[nH]nc2O)c2c(O)[nH]nc2C)c1</chem>          | 0 |
| 264 | C44713547 | <chem>O=C1NC(C#N)=CC=C1</chem>                                            | 0 |
| 265 | C37191919 | <chem>S(CC=1OC=C(O)C(=O)C=1)c1enc(N)cc1</chem>                            | 0 |
| 266 | C49175419 | <chem>O=C(Nc1[nH]jenn1)c1sc(CC)nc1</chem>                                 | 0 |
| 267 | C58386988 | <chem>O=C(Nc1[nH]jenn1)C(C)n1nccc1</chem>                                 | 0 |
| 268 | C54931059 | <chem>Oc1cc2oc3c(nnc(NC)c3)c2cc1</chem>                                   | 0 |
| 269 | C54930973 | <chem>Oc1cc2oc3c(nnc(N)c3)c2cc1</chem>                                    | 0 |
| 270 | C26252164 | <chem>S(C(C)(C)C)CC(=O)Nc1[nH]c(C(F)(F)F)nn1</chem>                       | 0 |
| 271 | C37336027 | <chem>Fe1cc(C(=O)C[N+H]([C@H](CC)C)C)c(O)cc1</chem>                       | 0 |
| 272 | C04641258 | <chem>O=[N+](([O-])C[C@@H](c1c(-c2c(O)cccc2)[nH]nc1O)c1cccc(OC)cc1</chem> | 0 |
| 273 | C35539829 | <chem>S(CCC)c1[nH]c(N=NCc2c(O)ccc([N+](=O)[O-])c2)nn1</chem>              | 0 |
| 274 | C71023433 | <chem>S=C1N([C@@H]2COCCC2)N=N[N-]1</chem>                                 | 0 |
| 275 | C36047656 | <chem>Clc1nc(C(C)C)[nH]n1</chem>                                          | 0 |
| 276 | C40166094 | <chem>ClC/C(O)=N\N1C(=O)C2(NC1=O)CCCC2</chem>                             | 0 |
| 277 | C21985804 | <chem>BrCC=1NC(=O)C([N+](=O)[O-])=CC=1</chem>                             | 0 |
| 278 | C41894378 | <chem>O=C(NCC#C)c1cc2[nH]nnc2cc1</chem>                                   | 0 |
| 279 | C67348972 | <chem>BrC1enc(Sc2nc(Cc3sccc3)[nH]n2)nc1</chem>                            | 0 |
| 280 | C22016501 | <chem>O=[N+](([O-])c1c(NC)cccc/C=C/2\C(=O)c3c(O)2cc(O)cc3)c1</chem>       | 0 |
| 281 | C20566198 | <chem>S(=O)(=O)(N1CCCCC1)c1cc(N)c(O)cc1</chem>                            | 0 |
| 282 | C26507275 | <chem>O=C1N/C(=N\N=C/e2cc(O)c(O)cc2)/SC1</chem>                           | 0 |
| 283 | C49277952 | <chem>O=C(NC[C@@H]1CC=CCC1)c1nn[nH]c1</chem>                              | 0 |
| 284 | C48941524 | <chem>O=C(N[C@H](C(C)(C)C)c1sccc1)c1nn[nH]c1</chem>                       | 0 |
| 285 | C70227460 | <chem>O=C(N[C@H](CC)C)c1nn[nH]c1</chem>                                   | 0 |
| 286 | C59382120 | <chem>ClC=1C(=O)/C(=C\NN(CC)c2n[nH]cn2)/C=C(Cl)C=1</chem>                 | 0 |
| 287 | C59391068 | <chem>FC(F)(F)c1nn(-c2nc(C)[nH]n2)c(C)c1</chem>                           | 0 |
| 288 | C66339779 | <chem>O=C1NC=Nc2sc(O)cc12</chem>                                          | 0 |
| 289 | C13523790 | <chem>O=C1C(O)=CCC(=O)N1</chem>                                           | 0 |
| 290 | C19921476 | <chem>Oc1c(CNc2c(C#N)cccc2)ccc(O)c1</chem>                                | 0 |
| 291 | C05925899 | <chem>Oc1n(-c2ccc(N)cc2)nc(C)c1</chem>                                    | 0 |
| 292 | C70819542 | <chem>Cc1noc(-c2[nH]c3c(n2)cncc3)c1</chem>                                | 0 |
| 293 | C19265400 | <chem>O=C1N(Cc2c(N)cccc2)N=C(O)C=C1</chem>                                | 0 |
| 294 | C13597953 | <chem>S=C1N2c3c(NC(=O)C2=N[N-]1)cccc3</chem>                              | 0 |
| 295 | C49569665 | <chem>S=C1N([C@@H]2[C@@H]3[N+H](CC2)CCC3)N=N[N-]1</chem>                  | 0 |
| 296 | C57544366 | <chem>S(=O)(=O)(N[C@@H](C#N)C(C)C)c1c(C)[nH]nc1C</chem>                   | 0 |
| 297 | C06863423 | <chem>O=C(Nc1[nH]jenn1)c1nccc1</chem>                                     | 0 |
| 298 | C36164606 | <chem>O=C(Nc1scnn1)c1c[nH]nc1</chem>                                      | 0 |
| 299 | C70801477 | <chem>Nc1cc(-c2[nH]c3c(n2)cncc3)enc1</chem>                               | 0 |

|     |           |                                                                                 |   |
|-----|-----------|---------------------------------------------------------------------------------|---|
| 300 | C04723991 | Br1cc(-c2[nH]c(SCC(=O)N3CCCC3)nn2)c(O)cc1                                       | 0 |
| 301 | C68574043 | BrC(C(F)(F)F)(C(F)(F)F)C(=O)Nc1[nH]cnn1                                         | 0 |
| 302 | C26509211 | S=C1N(N)C(COc2c(C)cccc2)=N[N-]1                                                 | 0 |
| 303 | C53993787 | FC(F)(F)[C@@H]1NC(=O)/C(=C(O))[O-]/CC1                                          | 0 |
| 304 | C50290939 | O=C([O-])C1(C(=O)Nc2c[nH]nc2)CCC1                                               | 0 |
| 305 | C19702731 | Oc1c(C=2Sc3n(c(C)nn3)N=2)ccc(N)c1                                               | 0 |
| 306 | C04831683 | BrC=1[C@H](C)Nc2n(C=1O)nc(SC)n2                                                 | 0 |
| 307 | C32500915 | S(=O)(=O)(N)c1c(C)oc(CO)c1                                                      | 0 |
| 308 | C64354793 | O=[N+](O)c1c(C)[nH]nc1C(=O)NOC                                                  | 0 |
| 309 | C43705044 | O=C([O-])[C@H]1OCC[N+H]([C@H]2[C@H](O)CCCC2)C1                                  | 0 |
| 310 | C62748414 | Fe1cc(O)c([C@H]([N+H2])[C@@H]2C(=O)NCCC2)C)cc1                                  | 0 |
| 311 | C06444995 | O=[N+](O)c1c(-c2ccc(N)cc2)[nH]cn1                                               | 0 |
| 312 | C04552279 | S(C)c1[nH]c2C(=O)NC(=O)Nc2n1                                                    | 0 |
| 313 | C49474272 | S(C)c1nn2C(=N)CC(=O)Nc2n1                                                       | 0 |
| 314 | C49474284 | BrC1C(=N)n2nc(C)nc2NC1=O                                                        | 0 |
| 315 | C40166096 | S=C1N(C)C(=O)c2c(n[nH]c2)N1                                                     | 0 |
| 316 | C14983852 | Fe1cc(C(=O)[O-])c2c(C=O)n[nH]c2c1                                               | 0 |
| 317 | C52813773 | S(c1c(C)cc(N)cn1)c1n[nH]en1                                                     | 0 |
| 318 | C27028316 | S=C1N(NCc2ccc(O)cc2)C(C)=N[N-]1                                                 | 0 |
| 319 | C07601230 | S=C1N(NCc2c(C)cccc2)C=N[N-]1                                                    | 0 |
| 320 | C01086073 | O=[N+](O)c1c2NC(=O)Nc2c[n+H]c1                                                  | 0 |
| 321 | C40887204 | Nc1ccc(-c2nc(-c3[nH]cnn3)sc2)cc1                                                | 0 |
| 322 | C48628234 | S=C1NC([C@H]2COCC2)=N[N-]1                                                      | 0 |
| 323 | C71777422 | S=C1N[C@H](c2occc2)C(C#N)=C(O)N1                                                | 0 |
| 324 | C13303738 | O=NC=1C(OC)(OC)CCCC=1NO                                                         | 0 |
| 325 | C71462807 | O=C(N1CC[N+H2]CC1)c1c(O)c(C)ccc1C                                               | 0 |
| 326 | C19913879 | O=Cc1cc(C[N+H]2CCOCC2)c(O)cc1                                                   | 0 |
| 327 | C71773815 | O=C1C(O)=C(C[N+H]2CCOCC2)OC=C1                                                  | 0 |
| 328 | C06557481 | s1nc2c3[nH]nnc3ccc2n1                                                           | 0 |
| 329 | C70801340 | [N+H2](Cc1[nH]c2c(n1)cncc2)C                                                    | 0 |
| 330 | C08626636 | Clc1nnc(O)c2[nH]cnc12                                                           | 0 |
| 331 | C22135293 | Oc1c(C[N+H]2CCOCC2)ncnc1C                                                       | 0 |
| 332 | C71618367 | O[C@H](CO)[C@]1(O)[C@H](c2ccc(C)cc2)[C@]2(O)[C@@H](O)[C@H](c3ccc(C)cc3)[C@@]12O | 0 |
| 333 | C40906154 | O(C)c1cc(O)c(CNc2c(C)[nH]nc2C)cc1                                               | 0 |
| 334 | C34445516 | ClC1(Cl)[C@@H](O)C(Cl)=C[C@@]1(O)C(=O)[O-]                                      | 0 |
| 335 | C57218752 | O=C1C(=O)c2c3[nH]ncc3cc(C)c2N1                                                  | 0 |
| 336 | C45814453 | O=C1C(=O)Nc2c(N)cc(O)cc2                                                        | 0 |
| 337 | C28760463 | S=C1N(CC2=CNC(=O)C=C2)C=CN1                                                     | 0 |
| 338 | C04095849 | S=C1NC=Ne2[nH]cnc12                                                             | 0 |
| 339 | C18127213 | S=C1NC(=O)c2[nH]cnc2N1                                                          | 0 |
| 340 | C44264492 | Ne1cn(Cc2[nH]c3ncccc3n2)nc1                                                     | 0 |
| 341 | C19933063 | S=C1NC(CCC(=O)[O-])=N[N-]1                                                      | 0 |
| 342 | C68573638 | FC(F)(F)C(/N=C(/[O-])\Nc1[nH]cnn1)(C(F)(F)F)C(F)(F)F                            | 0 |

|     |           |                                                      |   |
|-----|-----------|------------------------------------------------------|---|
| 343 | C32501662 | O=C([O-])Cc1[nH]c(-c2c(O)cccc2)nn1                   | 0 |
| 344 | C16382917 | S([C@@H]1/C(=[N+H]/[O-])/CCCCC1)c1[nH]enn1           | 0 |
| 345 | C43460814 | Br1cnc2[nH]c(C[C@@](C(=O)[O-])(C(C)C)C)[n+H]c2c1     | 0 |
| 346 | C06519447 | S(CC(=O)N)c1nc(CC)[nH]n1                             | 0 |
| 347 | C49474200 | O=C1N2[N+H]=CNN=C2N=C(C)C1                           | 0 |
| 348 | C17173835 | O=C([O-])/C=C/C(=O)N[O-]                             | 0 |
| 349 | C70602579 | O=C(OC1CCCCC1)c1nc(N)[nH]n1                          | 0 |
| 350 | C37921092 | Clc1c(Cl)cc(C(=O)NCc2[nH]enn2)[nH]1                  | 0 |
| 351 | C40290664 | S(c1c(C[N+H3])c(C)c(C)nn1)c1[nH]enn1                 | 0 |
| 352 | C53129360 | O=C([O-])C([N+H2][C@@]1(CO)C[C@H](C)CCC1)(C)C        | 0 |
| 353 | C45655737 | N([C@@H](C)c1nnn[n-]1)[C@@H]1C[N+H](C(C)C)CC1        | 0 |
| 354 | C44926888 | Oc1cc2c([C@@H]([N+H2][C@H](C)c3nnn[n-]3)CCC2)cc1     | 0 |
| 355 | C70841874 | O=C([O-])[C@](NC(=O)c1nn[nH]c1)(C)C1CC1              | 0 |
| 356 | C54931842 | S(c1ncnc2[nH]cnc12)C1C[N+H2]C1                       | 0 |
| 357 | C50845072 | Nc1nc(-c2n[nH]cn2)nc(C)c1                            | 0 |
| 358 | C70251249 | O=C(Nc1ncnc2nc[nH]c12)COC                            | 0 |
| 359 | C39899630 | Cl[C@@H](C(=O)Nc1ncnc2[nH]cnc12)C                    | 0 |
| 360 | C43569657 | S(c1n[nH]en1)c1[n+H]ccc(N)c1                         | 0 |
| 361 | C61712998 | O=C([O-])CCNC(=O)N1C[C@@H](O)CC1                     | 0 |
| 362 | C16383208 | Br1c(O)c(CN=Nc2nn[n-]n2)cc(Cl)c1                     | 0 |
| 363 | C17533368 | O=C([O-])[C@](O)(C[N+H](CC)C)C                       | 0 |
| 364 | C12841401 | P(=O)(Oc1c(CC)c(CO)c[n+H]c1C)([O-])[O-]              | 0 |
| 365 | C08769510 | OCCNc1nc(O)c(C)nn1                                   | 0 |
| 366 | C69948985 | S(=O)(=O)/(N=C/1\NOC=C\1)c1nc[nH]c1                  | 0 |
| 367 | C45220738 | S(C[C@@]([N+H3])(C#N)c1cccc1)c1nc(C)[nH]n1           | 0 |
| 368 | C50330349 | [N+H2](CCC)[C@@H]1c2sc(-c3[nH]enn3)nc2CCC1           | 0 |
| 369 | C61844291 | C([N+H]1Cc2sc(-c3[nH]enn3)nc2CC1)c1cccc1             | 0 |
| 370 | C61171580 | O=C([O-])C([N+H](C)[C@@H]1[C@@H](O)CS(=O)(=O)C1)(C)C | 0 |
| 371 | C69949399 | S(=O)(=O)(N[C@H](C#N)C)c1nc(C)[nH]c1                 | 0 |
| 372 | C13479816 | O=C1N(C[N+H]2CCC(C)CC2)N=C(O)C=C1                    | 0 |
| 373 | C12364126 | O=C(C)N1[C@@H](O)[C@@H](O)N(C(=O)C)C1=O              | 0 |
| 374 | C02383087 | O=CC(O)C=O                                           | 0 |
| 375 | C17957808 | S(Sc1[nH]ncn1)c1[nH]enn1                             | 0 |
| 376 | C02245250 | S=C([O-])CC=1SC(=S)NN=1                              | 0 |
| 377 | C01239139 | S=C1C(C)=N[N-]C(=S)N1                                | 0 |
| 378 | C01599195 | O=C1[N-]C(=O)c2nsnc2[N-]1                            | 0 |
| 379 | C21300171 | [S-]c1c(C(=O)[O-])c([O-])ns1                         | 0 |
| 380 | 103       | S(=O)(=O)(Nc1ccc(S(=O)(=O)N)cc1)c1c(C(=O)[O-])scc1   | 1 |
| 381 | 309       | O=C([O-])c1c(NC(=O)c2c(C)cco2)cccc1                  | 1 |
| 382 | 307       | O=C([O-])CN1C(=O)[C@H](c2cccc2)OC1=O                 | 1 |
| 383 | 205       | O=C([O-])C(Cc1cccc1)N1C(=O)c2c(C1=O)cccc2            | 1 |
| 384 | 101       | S(CCC(=O)[O-])c1sc2c(n1)cccc2                        | 1 |
| 385 | 322       | O=C(Nc1c(C(=O)[O-])ccs1)C                            | 1 |

|     |     |                                                                                  |   |
|-----|-----|----------------------------------------------------------------------------------|---|
| 386 | 306 | <chem>S(=O)(=O)(N)c1c(C(=O)[O-])cccc1</chem>                                     | 1 |
| 387 | 212 | <chem>S(CCC(C(=O)[O-])N1C(=O)c2c(C1=O)ccc(C(=O)[O-])c2)C</chem>                  | 1 |
| 388 | 202 | <chem>O=C([O-])C(Cc1cccc1)N1C(=O)c2c(C1=O)ccc(C(=O)[O-])c2</chem>                | 1 |
| 389 | 211 | <chem>O=C([O-])[C@@H](Cc1c2c(ccc1)cccc2)N1C(=O)c2c(C1=O)ccc(C(=O)[O-])c2</chem>  | 1 |
| 390 | 208 | <chem>O=C([O-])C[C@@H](Cc1c2c(ccc1)cccc2)N1C(=O)c2c(C1=O)ccc(C(=O)[O-])c2</chem> | 1 |
| 391 | 102 | <chem>S(=O)(=O)([O-])CCCSc1sc2c(n1)cccc2</chem>                                  | 1 |
| 392 | 206 | <chem>O=C([O-])c1cc2C(=O)N(CCc3ccc(O)cc3)C(=O)c2cc1</chem>                       | 1 |
| 393 | 304 | <chem>O=C([O-])[C@@H]([C@@H](O)C)N1C(=O)c2c(C1=O)cccc2</chem>                    | 1 |
| 394 | 308 | <chem>O=C([O-])[C@@H]1CN(c2c(O)cccc2)C(=O)C1</chem>                              | 1 |
| 395 | 312 | <chem>O=C([O-])c1[nH]c(-c2cccc2)nc1</chem>                                       | 1 |
| 396 | 317 | <chem>Clc1ccc(-c2c(C(=O)[O-])c(N)on2)cc1</chem>                                  | 1 |
| 397 | 320 | <chem>Sc1[nH]c([C@@H]2[C@H](C(=O)[O-])CCCC2)nn1</chem>                           | 1 |
| 398 | 303 | <chem>O=C1N(c2nnn[n-]2)NC(C)=C1CC</chem>                                         | 1 |
| 399 | 319 | <chem>P(=O)([O-])([O-])c1cc2sc(C)[n+H]c2cc1</chem>                               | 1 |

Table S3. Compounds used in the Rac1 VS. Inactives are labelled as “0”, actives as “1”

| Lig. # | mol                                                                                 | active |
|--------|-------------------------------------------------------------------------------------|--------|
| 1      | <chem>O=C(NN=C1C(=O)Nc2c1cccc2)c1c(C)nc(-c2cccc2)cc1</chem>                         | 0      |
| 2      | <chem>Brc1cc2C(=NNC(=O)c3c(C)nc(-c4ccc(CI)cc4)cc3)C(=O)Nc2cc1</chem>                | 0      |
| 3      | <chem>O=C(C=Cc1cc2OCOc2cc1)c1c(C)nc(-c2cccc2)cc1</chem>                             | 0      |
| 4      | <chem>O=C(NN=C1C(=O)Nc2c1cccc2)c1c(C)nc(-c2ccc(C)cc2)cc1</chem>                     | 0      |
| 5      | <chem>Clc1ccc(-c2ncc(C(=O)NN=C3C(=O)Nc4c3cccc4)cc2)cc1</chem>                       | 0      |
| 6      | <chem>S(=O)(=O)(N1CCCCC1)c1ccc(NC(=O)c2[nH]nc(-c3c(O)c(C)ccc3)c2)cc1</chem>         | 0      |
| 7      | <chem>S(=O)(=O)(N1C[C@@H](C)CCC1)c1ccc(NC(=O)c2[nH]nc(-c3c(O)ccc(C)c3)c2)cc1</chem> | 0      |
| 8      | <chem>Brc1ccc(C2N(c3ccc(S(=O)(=O)N)cc3)N=C(c3ccc(O)ccc3)C2)cc1</chem>               | 0      |
| 9      | <chem>S(=O)(=O)(N)c1ccc(N2C(c3ccc(O)cc3)CC(c3sccc3)=N2)cc1</chem>                   | 0      |
| 10     | <chem>Clc1ccc(-c2nc(C)c(C(=O)NN=Cc3cc4OCOc4cc3)cc2)cc1</chem>                       | 0      |
| 11     | <chem>S(=O)(=O)(N)c1ccc(N2C(c3cc(C)ccc3)CC(c3cccc3)=N2)cc1</chem>                   | 0      |
| 12     | <chem>S(=O)(=O)(N)c1ccc(N2C(c3ccc(OC)cc3)CC(c3cccc3)=N2)cc1</chem>                  | 0      |
| 13     | <chem>S(=O)(=O)(N)c1ccc(N2C(c3ccc(O)cc3)CC(c3sccc3)=N2)cc1</chem>                   | 0      |
| 14     | <chem>S(=O)(=O)(Cc1nccn1)c1ccc(NC(=S)NC(=O)COc2cccc2)cc1</chem>                     | 0      |
| 15     | <chem>[N+][C@H](C(NN=Cc1c2ncnc2cc1)=C)Cc1cccc1</chem>                               | 0      |
| 16     | <chem>S(=O)(=O)(Nc1cccc1)c1ccc(NC(=S)NC(=O)COc2cccc2)cc1</chem>                     | 0      |
| 17     | <chem>S(=O)(=O)(NCCCCC[N+])c1c2c(ccc1)cccc2</chem>                                  | 0      |
| 18     | <chem>Clc1c2c(c(S(=O)(=O)NCCCCC[N+])ccc2)ccc1</chem>                                | 0      |
| 19     | <chem>Brc1cc(C2N(c3ccc(S(=O)(=O)N)cc3)N=C(c3cccc3)C2)ccc1</chem>                    | 0      |
| 20     | <chem>Brc1cc(Cl)c(OCC(=O)NC(=S)Nc2ccc(S(=O)(=O)Nc3nccn3)cc2)cc1</chem>              | 0      |
| 21     | <chem>S(=O)(=O)(N)c1ccc(N2C(c3ccc(C)cc3)CC(c3cccc3)=N2)cc1</chem>                   | 0      |
| 22     | <chem>Brc1cc(C2N(c3ccc(S(=O)(=O)N)cc3)N=C(c3cccc3)C2)ccc1</chem>                    | 0      |
| 23     | <chem>S(=O)(=O)(N)c1ccc(N2C(c3cccc3)CC(c3cccc3)=N2)cc1</chem>                       | 0      |
| 24     | <chem>S(=O)(=O)(N)c1ccc(-n2c(-c3ccc(OC)cc3)cc(-c3cccc3)n2)cc1</chem>                | 0      |
| 25     | <chem>S(=O)(=O)(N)c1ccc(-n2c(-c3ccc(OC)cc3)cc(-c3cc(OC)ccc3)n2)cc1</chem>           | 0      |
| 26     | <chem>O=C(NN=Cc1cc2ncnc2cc1)C([N+])Cc1c2c([nH]c1)cccc2</chem>                       | 0      |
| 27     | <chem>Clc1cc(C2N(c3ccc(S(=O)(=O)N)cc3)N=C(c3cccc3)C2)ccc1</chem>                    | 0      |
| 28     | <chem>S(=O)(=O)(N)c1ccc(N2C(c3ccc(OC)cc3)CC(c3c(OC)cccc3)=N2)cc1</chem>             | 0      |

|    |                                                                                       |   |
|----|---------------------------------------------------------------------------------------|---|
| 29 | <chem>S(=O)(=O)(N)c1ccc(N2C(c3cc(OC)ccc3)CC(c3ccccc3)=N2)cc1</chem>                   | 0 |
| 30 | <chem>O=C(NN=Cc1cc2ncnc2cc1)C([N+])C(C)C</chem>                                       | 0 |
| 31 | <chem>O=C1Oe2c(cccc2)C=2OC(N)=C(C#N)C(c3ccccc3)C1=2</chem>                            | 0 |
| 32 | <chem>S(=O)(=O)(N1CCCC(NC(=O)c2[nH]nc(-c3ccc(C)cc3)c2)CC1)c1ccc(OC)cc1</chem>         | 0 |
| 33 | <chem>S(=O)(=O)(N1[C@H](CC)CCCC1)c1ccc(NC(=O)c2[nH]nc(-c3e(O)cccc3)c2)cc1</chem>      | 0 |
| 34 | <chem>Clc1ccc(C2N(c3ccc(S(=O)(=O)N)cc3)N=C(c3ccccc3)C2)cc1</chem>                     | 0 |
| 35 | <chem>O=C([O-])[C@@H](NC(=O)c1cc2ncnc2cc1)Cc1ccccc1</chem>                            | 0 |
| 36 | <chem>S(=O)(=O)(N1CCCC1)c1c(OC)ccc(C(=O)Nc2c3c(c(N4CCCC4)cc2)ccnc3)c1</chem>          | 0 |
| 37 | <chem>S(=O)(=O)(N1CCCCC1)c1cc(NC(=O)c2[nH]nc(-c3ccccc3)c2)c(OC)cc1</chem>             | 0 |
| 38 | <chem>O=C(NCCCC1[nH]c2c(n1)cc1c(c2)cccc1)c1cc2ncnc2cc1</chem>                         | 0 |
| 39 | <chem>S(=O)(=O)(Nc1ccc(NC(=O)c2ccc(OCc3c(C)onc3C)cc2)cc1)c1ccc(F)cc1</chem>           | 0 |
| 40 | <chem>O=C1Oe2c(cccc2)C2OC(N)=C(C#N)C(c3ccc(O)cc3)C12</chem>                           | 0 |
| 41 | <chem>O=C(NN=Cc1cc2c(cc(O)cc2)cc1)Cc1c2c([nH]c1)cccc2</chem>                          | 0 |
| 42 | <chem>O=[N+][O-]c1ccc([C@H]2C(C#N)=C(N)OC=3c4c(OC(=O)C2=3)cccc4)ccc1</chem>           | 0 |
| 43 | <chem>N(C(=C)CCCc1c2c([nH]c1)cccc2)c1cc2c(nc2)cc1</chem>                              | 0 |
| 44 | <chem>Brc1ccc(C2N(c3ccc(S(=O)(=O)N)cc3)N=C(c3ccccc3)C2)cc1</chem>                     | 0 |
| 45 | <chem>N(CCC[N+])C(OCC1)c1nc(Nc2cc3senc3cc2)cc(C)n1</chem>                             | 0 |
| 46 | <chem>S(=O)(=O)(N1CCCCC1)c1ccc(NC(=O)c2[nH]nc(-c3c(O)c(C)c(C)cc3)c2)cc1</chem>        | 0 |
| 47 | <chem>S(=O)(=O)(N)c1ccc(N2C(c3ccc(OC)cc3)CC(C)=N2)cc1</chem>                          | 0 |
| 48 | <chem>O=C(N(CCO)C)[C@H]([N+])Cc1c2c([nH]c1)cccc2</chem>                               | 0 |
| 49 | <chem>S(=O)(=O)(N1[C@H](C)CCCC1)c1ccc(NC(=O)c2[nH]nc(-c3c(O)cccc3)c2)cc1</chem>       | 0 |
| 50 | <chem>Clc1nc(Nc2cc3nsc3cc2)cc(C)n1</chem>                                             | 0 |
| 51 | <chem>[N+](CCCC(Nc1nc(Nc2ccccc2)cc(C)n1)C)(CC)CC</chem>                               | 0 |
| 52 | <chem>Clc1cc(NC(=O)CSC=2N(C(=O)NN=2)C2CC2)c([N+](=O)[O-])cc1</chem>                   | 0 |
| 53 | <chem>N(CCCC(CC)CC)c1nc(Cc2cc3c([nH]nc3)cc2)ccn1</chem>                               | 0 |
| 54 | <chem>S(=O)(=O)(NC)c1c(C)ccc(NC(=O)c2cc(OCc3c(C)onc3C)ccc2)c1</chem>                  | 0 |
| 55 | <chem>S(=O)(=O)(N1CCC(C)CC1)c1ccc(NC(=O)c2[nH]nc(-c3e(O)ccc(C)c3)c2)cc1</chem>        | 0 |
| 56 | <chem>S(=O)(=O)(N)c1ccc(N2C(c3cc(C)ccc3)CC(c3ccccc3)=N2)cc1</chem>                    | 0 |
| 57 | <chem>S(=O)(=O)(N)c1ccc(N2C(c3ccc(OC)cc3)CC(C(C)(C)C)=N2)cc1</chem>                   | 0 |
| 58 | <chem>Clc1nc(Nc2cc3[nH]c(C(F)(F)F)nc3cc2)ccn1</chem>                                  | 0 |
| 59 | <chem>Clc1nc(Nc2cc3c([nH]nc3)cc2)ccn1</chem>                                          | 0 |
| 60 | <chem>S(=O)(=O)(N1CCCCC1)c1c(OC)ccc(NC(=O)c2ccc(-n3c(C)cc(C)n3)cc2)c1</chem>          | 0 |
| 61 | <chem>FC(F)(F)c1[nH]c2c(n1)cc(Nc1nc(NCCC[N+](CC)CC)nc1)cc2</chem>                     | 0 |
| 62 | <chem>FC(F)(F)c1[nH]c2c(n1)cc(Nc1nc(NC(CCC[N+](CC)C)C)nc1)cc2</chem>                  | 0 |
| 63 | <chem>S(=O)(=O)(N)c1ccc(N2C(c3ccc(OC)cc3)CC(c3ccc(OC)cc3)=N2)cc1</chem>               | 0 |
| 64 | <chem>O=[N+][O-]c1ccc(C2[C@@H](C#N)C([N+])OC3c4c(OCC23)cccc4)cc1</chem>               | 0 |
| 65 | <chem>S(=O)(=O)(N1C[C@@H](C)CCC1)c1ccc(NC(=O)c2[nH]nc(-c3e(O)cccc3)c2)cc1</chem>      | 0 |
| 66 | <chem>N(c1nc(NC2CCCC2)nc1)c1ccccc1</chem>                                             | 0 |
| 67 | <chem>S(=O)(=O)(N1C[C@H](C)CCC1)c1ccc(NC(=O)c2[nH]nc(-c3c(O)ccc(C)c3)c2)cc1</chem>    | 0 |
| 68 | <chem>S(=O)(=O)(N)c1ccc(N2C(c3ccc(C)cc3)CC(c3ccccc3)=N2)cc1</chem>                    | 0 |
| 69 | <chem>S(=O)(=O)(N)c1ccc(N2C(c3ccc(C)cc3)CC(c3ccccc3)=N2)cc1</chem>                    | 0 |
| 70 | <chem>Clc1cc(c(O)cc1)-c1n[nH]c(C(=O)Nc2ccc(S(=O)(=O)N3CCCC3)cc2)c1</chem>             | 0 |
| 71 | <chem>O=C(N(Cc1ccccc1)C)C([N+])Cc1c2c([nH]c1)cccc2</chem>                             | 0 |
| 72 | <chem>S(=O)(=O)(N)c1ccc(N2C(c3cc(F)ccc3)CC(c3ccccc3)=N2)cc1</chem>                    | 0 |
| 73 | <chem>S(=O)(=O)(N1C[C@H](C)CCC1)c1ccc(NC(=O)c2[nH]nc(-c3c(O)c(C)c(C)cc3)c2)cc1</chem> | 0 |
| 74 | <chem>S(=O)(=O)(N)c1ccc(N2C(c3c(OC)cccc3)CC(c3ccccc3)=N2)cc1</chem>                   | 0 |
| 75 | <chem>S(=O)(=O)(Nc1cc(C(F)(F)F)ccc1)c1ccc(NC(=O)c2cc(OCc3c(C)onc3C)ccc2)cc1</chem>    | 0 |

|     |                                                                           |   |
|-----|---------------------------------------------------------------------------|---|
| 76  | S(=O)(=O)(N1CCCCC1)c1ccc(NC(=O)c2[nH]nc(-c3c(O)cc(C)cc3)c2)cc1            | 0 |
| 77  | S(=O)(=O)(N1CCCCC1)c1ccc(NC(=O)c2[nH]nc(-c3c(O)ccc(C)c3)c2)cc1            | 0 |
| 78  | S(=O)(=O)(N1C[C@@H](C)CCC1)c1ccc(NC(=O)c2[nH]nc(-c3c(O)c(C)c(C)cc3)c2)cc1 | 0 |
| 79  | [N+](CCCC(Nc1nc(Nc2cc3c(nc3)cc2)ccn1)C)(CC)CC                             | 0 |
| 80  | S(=O)(=O)(N1CCC(C)CC1)c1ccc(NC(=O)c2[nH]nc(-c3c(O)cc(C)c(C)c3)c2)cc1      | 0 |
| 81  | BrC1ccc(C2N(c3ccc(S(=O)(=O)N)cc3)N=C(c3ccc(OC)cc3)C2)cc1                  | 0 |
| 82  | S(=O)(=O)(N1[C@@H](C)CCC1)c1ccc(NC(=O)c2[nH]nc(-c3c(O)ccc3)c2)cc1         | 0 |
| 83  | S(=O)(=O)(N1C[C@@H](C)CCC1)c1ccc(NC(=O)c2[nH]nc(-c3c(O)c(C)cc(C)c3)c2)cc1 | 0 |
| 84  | O=C1Oc2c(ccc2)C=2OC(N)=C(C#N)C(c3ccc(C#N)cc3)C1=2                         | 0 |
| 85  | S(=O)(=O)(N1C[C@H](C)CCC1)c1ccc(NC(=O)c2[nH]nc(-c3c(O)cc(C)cc3)c2)cc1     | 0 |
| 86  | S(=O)(=O)(N1CCC(C)CC1)c1ccc(NC(=O)c2[nH]nc(-c3c(O)c(C)cc(C)c3)c2)cc1      | 0 |
| 87  | S(=O)(=O)(N)c1ccc(N2C(c3cc(OC)c(OC)cc3)CC(c3ccccc3)=N2)cc1                | 0 |
| 88  | S(=O)(=O)(N)c1ccc(N2C(c3ccc(OC)cc3)CC(c3cc(OC)ccc3)=N2)cc1                | 0 |
| 89  | O=C(NN=Cc1c2c([nH]c1)cccc2)c1c2c(nc(C)c1)cccc2                            | 0 |
| 90  | S(=O)(=O)(N1CCCCC1)c1ccc(NC(=O)c2[nH]nc(-c3c(O)c(C)cc(C)c3)c2)cc1         | 0 |
| 91  | Clc1cc(c(O)cc1)-c1n[nH]c(C(=O)Nc2ccc(S(=O)(=O)N3CCC(C)CC3)cc2)c1          | 0 |
| 92  | S(=O)(=O)(N1CCCCC1)c1ccc(NC(=O)c2[nH]nc(-c3c(O)c(C)c(C)cc3)c2)cc1         | 0 |
| 93  | S(=O)(=O)(N1CCCCC1)c1ccc(NC(=O)c2[nH]nc(-c3c(O)ccc3)c2)cc1                | 0 |
| 94  | S(=O)(=O)(N1CCCCC1)c1ccc(NC(=O)c2[nH]nc(-c3c(O)cc(C)c(C)c3)c2)cc1         | 0 |
| 95  | S(=O)(=O)(N1C[C@H](C)CCC1)c1ccc(NC(=O)c2[nH]nc(-c3c(O)c(C)cc(C)c3)c2)cc1  | 0 |
| 96  | S(=O)(=O)(N1CCCCC1)c1ccc(NC(=O)c2[nH]nc(-c3c(O)ccc(C)c3)c2)cc1            | 0 |
| 97  | S(=O)(=O)(N1C[C@H](C)CCC1)c1ccc(NC(=O)c2[nH]nc(-c3c(O)cc(C)c(C)c3)c2)cc1  | 0 |
| 98  | [N+](CCCNc1nc(Nc2cc3senc3cc2)cc(C)n1)(C)C                                 | 0 |
| 99  | S(=O)(=O)(N1CCCCC1)c1ccc(NC(=O)c2[nH]nc(-c3c(O)cc(C)cc3)c2)cc1            | 0 |
| 100 | S(=O)(=O)(N1C[C@@H](C)CCC1)c1ccc(NC(=O)c2[nH]nc(-c3c(O)cc(C)c(C)c3)c2)cc1 | 0 |
| 101 | Fe1c([N+](=O)[O-])cc(NCC(=O)Nc2ccc(N3CCOCC3)cc2)cc1                       | 0 |
| 102 | S(=O)(=O)(N1[C@@H](CC)CCC1)c1ccc(NC(=O)c2[nH]nc(-c3c(O)ccc3)c2)cc1        | 0 |
| 103 | S(=O)(=O)(N1CCCCC1)c1ccc(NC(=O)c2[nH]nc(-c3c(O)ccc3)c2)cc1                | 0 |
| 104 | Clc1ccc(-c2n[nH]c(C(=O)NC3CCN(S(=O)(=O)c4ccc(OC)cc4)CC3)c2)cc1            | 0 |
| 105 | S(=O)(=O)(N1CCC(C)CC1)c1ccc(NC(=O)c2[nH]nc(-c3c(O)c(C)c(C)cc3)c2)cc1      | 0 |
| 106 | S(=O)(=O)(Nc1c(F)cccc1)c1cc(NC(=O)c2ccc(OCc3c(C)onc3C)cc2)ccc1            | 0 |
| 107 | S(=O)(=O)(N)c1c(C)ccc(NC(=O)c2cc(OCc3c(C)onc3C)ccc2)c1                    | 1 |
| 108 | S(=O)(=O)(Nc1ccc(OC)cc1)c1c(N2CCCC2)ccc(NC(=O)c2n[nH]c3c2cccc3)c1         | 1 |
| 109 | S(=O)(=O)(N1CCCCC1)c1c(OC)ccc(NC(=O)c2n[nH]c3c2cccc3)c1                   | 1 |
| 110 | S(=O)(=O)(NC)c1c(C)ccc(NC(=O)C2ccc(OCc3c(C)onc3C)cc2)c1                   | 1 |
| 111 | S(=O)(=O)(N1C[C@H](C)CCC1)c1ccc(NC(=O)c2[nH]nc(-c3c(O)ccc3)c2)cc1         | 1 |
| 112 | S(=O)(=O)(N1CCCCC1)c1ccc(NC(=O)c2[nH]nc(-c3c(O)cc(C)c(C)c3)c2)cc1         | 1 |
| 113 | S(=O)(=O)(N1CCC(C)CC1)c1ccc(NC(=O)c2[nH]nc(-c3c(O)ccc3)c2)cc1             | 1 |
| 114 | S(=O)(=O)(N1CCC(C)CC1)c1ccc(NC(=O)c2[nH]nc(-c3c(O)c(C)c(C)cc3)c2)cc1      | 1 |
| 115 | S(=O)(=O)(N1CCCCC1)c1ccc(NC(=O)c2[nH]nc(-c3c(O)c(C)c(C)cc3)c2)cc1         | 1 |
| 116 | S(=O)(=O)(N1CCCCC1)c1ccc(NC(=O)c2[nH]nc(-c3c(O)ccc3)c2)cc1                | 1 |

Table S4. Predicted binding energies (kcal/mol) obtained from the analysis of the 1<sup>st</sup> ns of MD simulations run on GPU cards for the penicillopepsin system (RUN 1).

| Cmp  | $\Delta G_{exp}$ | Nwat = 0          |          | Nwat = 10         |          | Nwat = 20         |          | Nwat = 30         |          | Nwat = 40         |          | Nwat = 50         |          |
|------|------------------|-------------------|----------|-------------------|----------|-------------------|----------|-------------------|----------|-------------------|----------|-------------------|----------|
|      |                  | $\Delta G_{bind}$ | $\sigma$ | $\Delta G_{bind}$ | $\sigma$ | $\Delta G_{bind}$ | $\sigma$ | $\Delta G_{bind}$ | $\sigma$ | $\Delta G_{bind}$ | $\sigma$ | $\Delta G_{bind}$ | $\sigma$ |
| 1APT | -12.83           | -52.6             | 6.2      | -73.4             | 7.1      | -84.3             | 7.6      | -92.5             | 6.7      | -97.3             | 6.5      | -98.9             | 6.3      |
| 1APU | -10.51           | -32.3             | 3.7      | -43.0             | 5.4      | -51.2             | 6.2      | -58.2             | 5.7      | -61.6             | 5.5      | -63.3             | 5.5      |
| 1APV | -12.27           | -42.5             | 3.5      | -50.0             | 5.7      | -56.0             | 6.3      | -64.4             | 6.5      | -70.9             | 6.5      | -74.0             | 6.5      |
| 1APW | -10.91           | -30.0             | 4.3      | -38.4             | 6.5      | -46.7             | 6.5      | -57.1             | 6.5      | -64.4             | 7.1      | -68.2             | 7.3      |
| 2WEA | -8.37            | -36.7             | 7.1      | -21.9             | 7.4      | -30.0             | 9.2      | -40.7             | 9.0      | -47.5             | 8.5      | -49.9             | 8.8      |
| 2WEB | -7.03            | -12.5             | 5.4      | -16.0             | 7.1      | -25.1             | 7.1      | -32.8             | 7.2      | -35.4             | 7.6      | -36.0             | 7.9      |
| 2WEC | -6.80            | -39.2             | 6.0      | -28.2             | 8.7      | -34.2             | 9.7      | -44.1             | 10.5     | -52.4             | 11.0     | -57.2             | 11.1     |

Table S5. Predicted binding energies (kcal/mol) obtained from the analysis of the 1<sup>st</sup> ns of MD simulations run on GPU cards for the penicillopepsin system (RUN 2).

| Cmp  | $\Delta G_{exp}$ | Nwat = 0          |          | Nwat = 10         |          | Nwat = 20         |          | Nwat = 30         |          | Nwat = 40         |          | Nwat = 50         |          |
|------|------------------|-------------------|----------|-------------------|----------|-------------------|----------|-------------------|----------|-------------------|----------|-------------------|----------|
|      |                  | $\Delta G_{bind}$ | $\sigma$ | $\Delta G_{bind}$ | $\sigma$ | $\Delta G_{bind}$ | $\sigma$ | $\Delta G_{bind}$ | $\sigma$ | $\Delta G_{bind}$ | $\sigma$ | $\Delta G_{bind}$ | $\sigma$ |
| 1APT | -12.83           | -55.7             | 5.3      | -76.5             | 6.4      | -87.0             | 6.9      | -95.2             | 6.9      | -100.1            | 7.4      | -102.0            | 7.6      |
| 1APU | -10.51           | -41.3             | 3.3      | -47.8             | 6.0      | -56.2             | 6.4      | -63.5             | 7.0      | -67.2             | 8.2      | -68.1             | 8.8      |
| 1APV | -12.27           | -40.8             | 3.8      | -48.8             | 7.1      | -54.8             | 8.1      | -62.1             | 6.8      | -67.3             | 6.9      | -70.8             | 7.3      |
| 1APW | -10.91           | -24.4             | 5.9      | -31.1             | 6.8      | -37.7             | 6.9      | -47.5             | 7.3      | -55.2             | 7.1      | -59.7             | 7.2      |
| 2WEA | -8.37            | -40.7             | 6.5      | -20.4             | 7.3      | -23.8             | 6.9      | -33.4             | 7.0      | -40.4             | 7.6      | -42.6             | 7.5      |
| 2WEB | -7.03            | -10.7             | 5.1      | -14.2             | 7.4      | -22.3             | 8.5      | -29.4             | 8.4      | -32.3             | 8.1      | -32.6             | 8.4      |
| 2WEC | -6.80            | -38.6             | 6.7      | -28.5             | 8.0      | -32.1             | 8.0      | -40.4             | 8.1      | -48.0             | 8.5      | -51.8             | 9.1      |

Table S6. Predicted binding energies (kcal/mol) obtained from the analysis of the 1<sup>st</sup> ns of MD simulations run on GPU cards for the penicillopepsin system (RUN 3).

| Cmp  | $\Delta G_{exp}$ | Nwat = 0          |          | Nwat = 10         |          | Nwat = 20         |          | Nwat = 30         |          | Nwat = 40         |          | Nwat = 50         |          |
|------|------------------|-------------------|----------|-------------------|----------|-------------------|----------|-------------------|----------|-------------------|----------|-------------------|----------|
|      |                  | $\Delta G_{bind}$ | $\sigma$ | $\Delta G_{bind}$ | $\sigma$ | $\Delta G_{bind}$ | $\sigma$ | $\Delta G_{bind}$ | $\sigma$ | $\Delta G_{bind}$ | $\sigma$ | $\Delta G_{bind}$ | $\sigma$ |
| 1APT | -12.83           | -52.3             | 5.2      | -71.9             | 6.8      | -80.1             | 7.3      | -88.1             | 6.8      | -92.9             | 6.9      | -94.8             | 6.9      |
| 1APU | -10.51           | -31.5             | 3.9      | -36.2             | 6.0      | -41.6             | 6.7      | -48.0             | 7.0      | -51.1             | 7.4      | -51.6             | 7.7      |
| 1APV | -12.27           | -37.4             | 4.6      | -50.4             | 6.4      | -57.9             | 6.5      | -66.6             | 7.6      | -73.8             | 8.4      | -78.2             | 7.8      |
| 1APW | -10.91           | -21.2             | 5.1      | -36.6             | 7.6      | -46.2             | 8.4      | -56.9             | 7.8      | -65.7             | 8.1      | -70.3             | 8.5      |
| 2WEA | -8.37            | -39.5             | 6.1      | -24.5             | 7.2      | -31.7             | 7.5      | -42.3             | 7.6      | -50.0             | 8.6      | -53.6             | 9.5      |
| 2WEB | -7.03            | -17.8             | 6.4      | -21.8             | 6.7      | -30.2             | 6.8      | -35.8             | 7.1      | -37.2             | 7.1      | -37.1             | 7.1      |
| 2WEC | -6.80            | -38.8             | 5.9      | -27.1             | 7.8      | -29.6             | 8.3      | -37.5             | 8.7      | -45.5             | 8.7      | -50.7             | 9.2      |



Table S7. Predicted binding energies (kcal/mol) obtained from the analysis of the 1<sup>st</sup> ns of MD simulations run on HPC for the penicillopepsin system (RUN 1).

| Cmp  | $\Delta G_{exp}$ | Nwat = 0          |          | Nwat = 10         |          | Nwat = 20         |          | Nwat = 30         |          | Nwat = 40         |          | Nwat = 50         |          |
|------|------------------|-------------------|----------|-------------------|----------|-------------------|----------|-------------------|----------|-------------------|----------|-------------------|----------|
|      |                  | $\Delta G_{bind}$ | $\Sigma$ | $\Delta G_{bind}$ | $\sigma$ | $\Delta G_{bind}$ | $\sigma$ | $\Delta G_{bind}$ | $\sigma$ | $\Delta G_{bind}$ | $\sigma$ | $\Delta G_{bind}$ | $\sigma$ |
| 1APT | -12.83           | -46.7             | 7.0      | -66.1             | 9.1      | -77.7             | 8.3      | -87.4             | 7.9      | -92.7             | 8.1      | -94.9             | 8.1      |
| 1APU | -10.51           | -33.7             | 6.3      | -50.5             | 6.3      | -57.6             | 6.4      | -64.8             | 7.2      | -70.3             | 9.0      | -72.4             | 10.5     |
| 1APV | -12.27           | -42.7             | 4.4      | -48.0             | 5.3      | -54.6             | 5.6      | -62.6             | 6.0      | -69.4             | 6.0      | -73.9             | 5.7      |
| 1APW | -10.91           | -26.4             | 4.6      | -35.0             | 6.0      | -43.6             | 6.0      | -53.6             | 5.7      | -60.4             | 6.0      | -64.0             | 6.0      |
| 2WEA | -8.37            | -28.3             | 8.0      | -11.2             | 9.5      | -17.2             | 9.6      | -27.5             | 10.1     | -37.7             | 9.2      | -43.5             | 8.6      |
| 2WEB | -7.03            | -13.0             | 4.6      | -14.2             | 7.6      | -23.8             | 7.3      | -32.6             | 7.6      | -37.2             | 8.0      | -38.3             | 8.5      |
| 2WEC | -6.80            | -47.3             | 5.6      | -38.5             | 6.6      | -42.3             | 6.9      | -46.9             | 6.9      | -50.3             | 7.0      | -51.4             | 7.5      |

Table S8. Predicted binding energies (kcal/mol) obtained from the analysis of the 1<sup>st</sup> ns of MD simulations run on HPC for the penicillopepsin system (RUN 2).

| Cmp  | $\Delta G_{exp}$ | Nwat = 0          |          | Nwat = 10         |          | Nwat = 20         |          | Nwat = 30         |          | Nwat = 40         |          | Nwat = 50         |          |
|------|------------------|-------------------|----------|-------------------|----------|-------------------|----------|-------------------|----------|-------------------|----------|-------------------|----------|
|      |                  | $\Delta G_{bind}$ | $\sigma$ | $\Delta G_{bind}$ | $\sigma$ | $\Delta G_{bind}$ | $\sigma$ | $\Delta G_{bind}$ | $\sigma$ | $\Delta G_{bind}$ | $\sigma$ | $\Delta G_{bind}$ | $\sigma$ |
| 1APT | -12.83           | -48.3             | 5.0      | -66.6             | 7.1      | -73.3             | 8.2      | -80.5             | 7.9      | -86.0             | 7.9      | -88.3             | 7.7      |
| 1APU | -10.51           | -28.9             | 3.5      | -43.0             | 5.9      | -50.0             | 6.3      | -55.2             | 6.5      | -58.7             | 6.9      | -59.7             | 6.7      |
| 1APV | -12.27           | -35.2             | 8.1      | -52.0             | 6.5      | -59.0             | 6.8      | -67.1             | 7.0      | -74.8             | 7.2      | -79.4             | 7.6      |
| 1APW | -10.91           | -26.8             | 4.2      | -37.5             | 7.0      | -42.3             | 7.2      | -48.8             | 7.6      | -54.2             | 8.5      | -55.6             | 9.6      |
| 2WEA | -8.37            | -33.2             | 5.9      | -20.2             | 5.9      | -27.7             | 6.7      | -37.7             | 7.2      | -44.3             | 7.1      | -46.0             | 7.2      |
| 2WEB | -7.03            | -12.1             | 5.2      | -16.6             | 5.8      | -26.8             | 6.6      | -33.1             | 6.8      | -34.7             | 6.6      | -35.0             | 6.6      |
| 2WEC | -6.80            | -29.1             | 7.5      | -16.4             | 8.5      | -20.8             | 9.4      | -30.4             | 9.4      | -39.1             | 10.1     | -45.1             | 10.8     |

Table S9. Predicted binding energies (kcal/mol) obtained from the analysis of the 1<sup>st</sup> ns of MD simulations run on HPC for the penicillopepsin system (RUN 3).

| Cmp  | $\Delta G_{exp}$ | Nwat = 0          |          | Nwat = 10         |          | Nwat = 20         |          | Nwat = 30         |          | Nwat = 40         |          | Nwat = 50         |          |
|------|------------------|-------------------|----------|-------------------|----------|-------------------|----------|-------------------|----------|-------------------|----------|-------------------|----------|
|      |                  | $\Delta G_{bind}$ | $\sigma$ | $\Delta G_{bind}$ | $\sigma$ | $\Delta G_{bind}$ | $\sigma$ | $\Delta G_{bind}$ | $\sigma$ | $\Delta G_{bind}$ | $\sigma$ | $\Delta G_{bind}$ | $\sigma$ |
| 1APT | -12.83           | -50.8             | 4.9      | -67.5             | 6.4      | -75.7             | 7.2      | -83.3             | 6.5      | -88.2             | 6.3      | -90.2             | 6.4      |
| 1APU | -10.51           | -34.6             | 2.9      | -50.5             | 6.1      | -57.7             | 6.5      | -64.2             | 7.5      | -68.2             | 8.5      | -69.4             | 9.1      |
| 1APV | -12.27           | -37.8             | 5.8      | -51.1             | 9.7      | -57.7             | 8.8      | -65.9             | 6.6      | -72.6             | 7.0      | -76.4             | 8.0      |
| 1APW | -10.91           | -30.7             | 4.1      | -43.5             | 6.6      | -52.1             | 7.0      | -62.7             | 8.0      | -70.1             | 8.0      | -74.1             | 8.1      |
| 2WEA | -8.37            | -39.2             | 5.5      | -19.1             | 7.7      | -24.3             | 8.6      | -34.1             | 8.6      | -40.2             | 8.8      | -42.1             | 9.3      |
| 2WEB | -7.03            | -12.0             | 4.7      | -14.9             | 6.0      | -24.2             | 6.4      | -31.1             | 6.9      | -33.3             | 6.8      | -33.6             | 6.8      |
| 2WEC | -6.80            | -47.1             | 9.6      | -39.9             | 10.3     | -43.2             | 10.9     | -50.2             | 10.3     | -56.8             | 10.9     | -59.9             | 10.3     |

Table S10. Predicted binding energies (kcal/mol) obtained from the analysis of the 4<sup>th</sup> ns of MD simulations run on GPU cards for the penicillopepsin system (RUN 1).

| Cmp  | $\Delta G_{exp}$ | Nwat = 0          |          | Nwat = 10         |          | Nwat = 20         |          | Nwat = 30         |          | Nwat = 40         |          | Nwat = 50         |          |
|------|------------------|-------------------|----------|-------------------|----------|-------------------|----------|-------------------|----------|-------------------|----------|-------------------|----------|
|      |                  | $\Delta G_{bind}$ | $\sigma$ | $\Delta G_{bind}$ | $\sigma$ | $\Delta G_{bind}$ | $\sigma$ | $\Delta G_{bind}$ | $\sigma$ | $\Delta G_{bind}$ | $\sigma$ | $\Delta G_{bind}$ | $\sigma$ |
| 1APT | -12.83           | -48.8             | 5.0      | -66.7             | 7.8      | -78.8             | 8.3      | -87.1             | 7.4      | -91.8             | 7.1      | -93.6             | 6.8      |
| 1APU | -10.51           | -32.0             | 3.5      | -43.7             | 5.5      | -51.8             | 5.4      | -59.5             | 6.6      | -64.8             | 6.4      | -66.7             | 6.3      |
| 1APV | -12.27           | -43.1             | 3.6      | -50.1             | 4.8      | -54.7             | 5.3      | -62.9             | 6.9      | -70.3             | 7.3      | -75.0             | 7.3      |
| 1APW | -10.91           | -22.8             | 4.7      | -36.9             | 6.9      | -39.3             | 7.3      | -45.0             | 7.3      | -51.4             | 7.5      | -56.3             | 7.2      |
| 2WEA | -8.37            | -42.4             | 4.6      | -31.4             | 8.5      | -39.0             | 8.2      | -45.9             | 8.3      | -48.6             | 8.5      | -49.3             | 9.0      |
| 2WEB | -7.03            | -18.8             | 5.1      | -15.2             | 5.9      | -24.5             | 6.3      | -33.6             | 6.2      | -36.9             | 6.2      | -38.3             | 6.3      |
| 2WEC | -6.80            | -41.7             | 6.0      | -28.3             | 8.4      | -34.7             | 8.8      | -44.6             | 8.2      | -51.7             | 7.6      | -55.8             | 7.6      |

Table S11. Predicted binding energies (kcal/mol) obtained from the analysis of the 4<sup>th</sup> ns of MD simulations run on GPU cards for the penicillopepsin system (RUN 2).

| Cmp  | $\Delta G_{exp}$ | Nwat = 0          |          | Nwat = 10         |          | Nwat = 20         |          | Nwat = 30         |          | Nwat = 40         |          | Nwat = 50         |          |
|------|------------------|-------------------|----------|-------------------|----------|-------------------|----------|-------------------|----------|-------------------|----------|-------------------|----------|
|      |                  | $\Delta G_{bind}$ | $\sigma$ | $\Delta G_{bind}$ | $\sigma$ | $\Delta G_{bind}$ | $\sigma$ | $\Delta G_{bind}$ | $\sigma$ | $\Delta G_{bind}$ | $\sigma$ | $\Delta G_{bind}$ | $\sigma$ |
| 1APT | -12.83           | -42.8             | 4.2      | -70.8             | 6.8      | -80.5             | 7.1      | -91.5             | 7.5      | -100.1            | 7.5      | -105.4            | 7.5      |
| 1APU | -10.51           | -31.9             | 3.1      | -40.9             | 5.2      | -47.4             | 6.2      | -58.9             | 6.8      | -69.8             | 6.4      | -77.5             | 6.7      |
| 1APV | -12.27           | -39.3             | 4.5      | -46.9             | 6.2      | -49.9             | 6.8      | -56.1             | 5.8      | -61.3             | 7.0      | -64.2             | 6.5      |
| 1APW | -10.91           | -22.8             | 3.0      | -41.6             | 5.8      | -46.8             | 7.0      | -55.3             | 6.5      | -64.2             | 7.1      | -70.2             | 7.7      |
| 2WEA | -8.37            | -31.3             | 5.7      | -17.7             | 8.3      | -20.1             | 7.6      | -30.6             | 8.1      | -38.0             | 7.8      | -40.8             | 8.2      |
| 2WEB | -7.03            | -13.4             | 4.8      | -9.1              | 6.2      | -17.9             | 6.9      | -27.2             | 7.6      | -31.1             | 7.6      | -32.3             | 7.6      |
| 2WEC | -6.80            | -41.2             | 7.9      | -26.0             | 8.9      | -30.3             | 8.9      | -40.9             | 8.1      | -51.6             | 8.0      | -59.8             | 8.0      |

Table S12. Predicted binding energies (kcal/mol) obtained from the analysis of the 4<sup>th</sup> ns of MD simulations run on GPU cards for the penicillopepsin system (RUN 3).

| Cmp  | $\Delta G_{exp}$ | Nwat = 0          |          | Nwat = 10         |          | Nwat = 20         |          | Nwat = 30         |          | Nwat = 40         |          | Nwat = 50         |          |
|------|------------------|-------------------|----------|-------------------|----------|-------------------|----------|-------------------|----------|-------------------|----------|-------------------|----------|
|      |                  | $\Delta G_{bind}$ | $\sigma$ | $\Delta G_{bind}$ | $\sigma$ | $\Delta G_{bind}$ | $\sigma$ | $\Delta G_{bind}$ | $\sigma$ | $\Delta G_{bind}$ | $\sigma$ | $\Delta G_{bind}$ | $\sigma$ |
| 1APT | -12.83           | -50.5             | 4.5      | -67.5             | 6.1      | -74.7             | 6.6      | -82.4             | 6.6      | -88.5             | 6.3      | -91.8             | 6.3      |
| 1APU | -10.51           | -35.2             | 3.8      | -39.5             | 5.3      | -46.3             | 5.5      | -52.8             | 5.7      | -55.4             | 5.9      | -55.5             | 6.1      |
| 1APV | -12.27           | -21.3             | 2.6      | -37.7             | 4.6      | -49.1             | 4.0      | -56.5             | 6.4      | -65.5             | 7.2      | -70.3             | 6.8      |
| 1APW | -10.91           | -41.1             | 4.3      | -52.4             | 6.4      | -60.8             | 7.2      | -69.4             | 6.8      | -76.2             | 6.9      | -80.0             | 7.7      |
| 2WEA | -8.37            | -46.9             | 5.0      | -33.8             | 6.8      | -40.7             | 7.8      | -51.1             | 7.9      | -58.6             | 8.1      | -61.4             | 7.8      |
| 2WEB | -7.03            | -14.9             | 4.4      | -14.6             | 6.4      | -24.0             | 6.9      | -33.0             | 6.8      | -38.0             | 6.4      | -39.2             | 6.7      |
| 2WEC | -6.80            | -38.8             | 5.9      | -27.1             | 7.8      | -29.6             | 8.3      | -37.5             | 8.7      | -45.5             | 8.7      | -50.7             | 9.2      |

Table S13. Predicted binding energies (kcal/mol) obtained from the analysis of the 4<sup>th</sup> ns of MD simulations run on HPC for the penicillopepsin system (RUN 1).

| Cmp  | $\Delta G_{exp}$ | Nwat = 0          |          | Nwat = 10         |          | Nwat = 20         |          | Nwat = 30         |          | Nwat = 40         |          | Nwat = 50         |          |
|------|------------------|-------------------|----------|-------------------|----------|-------------------|----------|-------------------|----------|-------------------|----------|-------------------|----------|
|      |                  | $\Delta G_{bind}$ | $\sigma$ | $\Delta G_{bind}$ | $\sigma$ | $\Delta G_{bind}$ | $\sigma$ | $\Delta G_{bind}$ | $\sigma$ | $\Delta G_{bind}$ | $\sigma$ | $\Delta G_{bind}$ | $\sigma$ |
| 1APT | -12.83           | -54.6             | 5.1      | -70.5             | 6.9      | -78.4             | 7.6      | -87.6             | 7.4      | -94.3             | 7.4      | -97.8             | 7.5      |
| 1APU | -10.51           | -26.1             | 4.0      | -44.1             | 6.8      | -51.7             | 7.2      | -61.0             | 7.3      | -70.0             | 7.7      | -75.6             | 7.8      |
| 1APV | -12.27           | -37.0             | 4.2      | -51.4             | 5.5      | -56.1             | 5.6      | -64.5             | 6.2      | -72.0             | 6.5      | -77.4             | 6.7      |
| 1APW | -10.91           | -22.8             | 4.6      | -32.8             | 6.2      | -41.6             | 6.5      | -52.6             | 6.7      | -59.6             | 7.1      | -63.1             | 7.7      |
| 2WEA | -8.37            | -21.5             | 3.7      | -3.1              | 7.5      | -8.2              | 7.5      | -19.4             | 7.9      | -28.3             | 8.1      | -34.0             | 8.3      |
| 2WEB | -7.03            | -5.9              | 5.5      | -3.2              | 6.2      | -11.4             | 6.4      | -20.2             | 6.6      | -25.3             | 6.8      | -27.4             | 6.7      |
| 2WEC | -6.80            | -45.1             | 5.3      | -38.1             | 8.4      | -43.9             | 8.6      | -52.6             | 8.4      | -58.0             | 8.9      | -59.7             | 9.1      |

Table S14. Predicted binding energies (kcal/mol) obtained from the analysis of the 4<sup>th</sup> ns of MD simulations run on HPC for the penicillopepsin system (RUN 2).

| Cmp | $\Delta G_{exp}$ | Nwat = 0          |          | Nwat = 10         |          | Nwat = 20         |          | Nwat = 30         |          | Nwat = 40         |          | Nwat = 50         |          |
|-----|------------------|-------------------|----------|-------------------|----------|-------------------|----------|-------------------|----------|-------------------|----------|-------------------|----------|
|     |                  | $\Delta G_{bind}$ | $\sigma$ | $\Delta G_{bind}$ | $\sigma$ | $\Delta G_{bind}$ | $\sigma$ | $\Delta G_{bind}$ | $\sigma$ | $\Delta G_{bind}$ | $\sigma$ | $\Delta G_{bind}$ | $\sigma$ |
| APT | -12.83           | -35.5             | 3.9      | -65.6             | 7.0      | -71.8             | 7.1      | -79.7             | 7.8      | -86.2             | 8.3      | -89.7             | 8.3      |
| APU | -10.51           | -28.9             | 4.8      | -42.3             | 5.4      | -47.8             | 5.5      | -54.4             | 5.5      | -60.1             | 5.7      | -63.1             | 5.6      |
| APV | -12.27           | -20.8             | 3.8      | -43.6             | 5.8      | -49.6             | 6.4      | -58.3             | 6.5      | -67.3             | 7.2      | -74.0             | 6.2      |
| APW | -10.91           | -19.4             | 4.3      | -39.2             | 6.5      | -46.0             | 7.2      | -55.4             | 6.2      | -64.2             | 7.5      | -69.6             | 8.1      |
| WEA | -8.37            | -49.3             | 4.6      | -32.1             | 7.6      | -38.8             | 8.4      | -49.1             | 8.6      | -56.3             | 8.6      | -60.7             | 8.3      |
| WEB | -7.03            | -10.5             | 5.6      | -9.8              | 7.0      | -17.9             | 7.1      | -27.2             | 7.6      | -31.6             | 7.6      | -32.5             | 7.6      |
| WEC | -6.80            | -32.6             | 6.6      | -19.6             | 8.7      | -25.7             | 10.6     | -36.3             | 10.5     | -44.6             | 11.2     | -48.3             | 11.6     |

Table S15. Predicted binding energies (kcal/mol) obtained from the analysis of the 4<sup>th</sup> ns of MD simulations run on HPC for the penicillopepsin system (RUN 3).

| Cmp  | $\Delta G_{exp}$ | Nwat = 0          |          | Nwat = 10         |          | Nwat = 20         |          | Nwat = 30         |          | Nwat = 40         |          | Nwat = 50         |          |
|------|------------------|-------------------|----------|-------------------|----------|-------------------|----------|-------------------|----------|-------------------|----------|-------------------|----------|
|      |                  | $\Delta G_{bind}$ | $\sigma$ | $\Delta G_{bind}$ | $\sigma$ | $\Delta G_{bind}$ | $\sigma$ | $\Delta G_{bind}$ | $\sigma$ | $\Delta G_{bind}$ | $\sigma$ | $\Delta G_{bind}$ | $\sigma$ |
| 1APT | -12.83           | -32.9             | 5.6      | -53.4             | 6.8      | -64.1             | 7.7      | -74.4             | 7.2      | -81.4             | 6.3      | -85.3             | 6.2      |
| 1APU | -10.51           | -26.8             | 2.9      | -50.1             | 5.6      | -58.7             | 6.0      | -69.6             | 6.6      | -78.4             | 6.8      | -83.2             | 6.8      |
| 1APV | -12.27           | -22.3             | 4.2      | -46.6             | 6.7      | -51.9             | 7.6      | -59.5             | 7.3      | -67.1             | 7.3      | -73.0             | 7.0      |
| 1APW | -10.91           | -24.3             | 4.4      | -41.1             | 7.3      | -50.2             | 7.3      | -60.0             | 7.0      | -68.1             | 7.0      | -73.7             | 7.0      |
| 2WEA | -8.37            | -41.9             | 4.0      | -27.8             | 6.0      | -33.8             | 6.6      | -44.2             | 6.8      | -51.8             | 7.3      | -54.5             | 6.7      |
| 2WEB | -7.03            | -15.7             | 5.1      | -10.0             | 6.0      | -18.5             | 7.0      | -28.2             | 6.9      | -33.3             | 6.6      | -34.1             | 6.9      |
| 2WEC | -6.80            | -28.5             | 4.7      | -17.5             | 8.4      | -19.5             | 8.4      | -31.9             | 8.6      | -45.0             | 8.7      | -55.7             | 9.3      |

Table S16. Predicted binding energies (kcal/mol) obtained from the analysis of the 1<sup>st</sup> ns of MD simulations run on GPU cards for the HIV1-protease system (RUN 1).

| Cmp  | ln(k <sub>i</sub> ) | Nwat = 0                 |          | Nwat = 10                |          | Nwat = 20                |          | Nwat = 30                |          | Nwat = 40                |          | Nwat = 50                |          | Nwat = 60                |          | Nwat = 70                |          |
|------|---------------------|--------------------------|----------|--------------------------|----------|--------------------------|----------|--------------------------|----------|--------------------------|----------|--------------------------|----------|--------------------------|----------|--------------------------|----------|
|      |                     | $\Delta G_{\text{bind}}$ | $\sigma$ | $\Delta G_{\text{bind}}$ | $\sigma$ | $\Delta G_{\text{bind}}$ | $\sigma$ | $\Delta G_{\text{bind}}$ | $\sigma$ | $\Delta G_{\text{bind}}$ | $\sigma$ | $\Delta G_{\text{bind}}$ | $\sigma$ | $\Delta G_{\text{bind}}$ | $\sigma$ | $\Delta G_{\text{bind}}$ | $\sigma$ |
| 3NDW | -2.81               | -54.2                    | 4.4      | -63.5                    | 5.8      | -69.3                    | 6.1      | -76.4                    | 6.0      | -80.8                    | 6.0      | -83.1                    | 6.2      | -84.4                    | 6.2      | -85.0                    | 6.1      |
| 3NDX | -2.81               | -55.6                    | 4.5      | -65.1                    | 5.9      | -71.4                    | 6.4      | -78.0                    | 6.6      | -81.4                    | 6.3      | -83.1                    | 6.3      | -84.0                    | 6.3      | -84.2                    | 6.3      |
| 3NU3 | -1.90               | -46.6                    | 4.1      | -59.7                    | 5.7      | -67.6                    | 5.8      | -68.9                    | 5.7      | -69.1                    | 5.7      | -69.1                    | 5.8      | -59.7                    | 5.7      | -67.6                    | 5.8      |
| 3NU4 | 0.41                | -45.9                    | 6.1      | -62.4                    | 5.4      | -69.1                    | 5.4      | -70.0                    | 5.6      | -70.1                    | 5.7      | -70.1                    | 5.7      | -62.4                    | 5.4      | -69.1                    | 5.4      |
| 3NU5 | 1.50                | -51.3                    | 4.7      | -62.1                    | 5.6      | -67.5                    | 5.6      | -68.4                    | 5.5      | -68.4                    | 5.7      | -68.2                    | 5.7      | -62.1                    | 5.6      | -67.5                    | 5.6      |
| 3NU6 | -0.69               | -48.7                    | 6.0      | -64.3                    | 5.5      | -69.4                    | 6.0      | -69.8                    | 5.9      | -69.8                    | 6.0      | -69.8                    | 5.9      | -64.3                    | 5.5      | -69.4                    | 6.0      |
| 3NU9 | -0.11               | -51.4                    | 4.4      | -62.4                    | 4.9      | -67.6                    | 5.0      | -68.1                    | 5.1      | -67.9                    | 5.2      | -67.9                    | 5.1      | -62.4                    | 4.9      | -67.6                    | 5.0      |
| 3NUJ | -0.89               | -50.2                    | 5.0      | -67.1                    | 6.0      | -74.6                    | 5.2      | -76.4                    | 5.0      | -76.6                    | 5.1      | -76.5                    | 5.0      | -67.1                    | 6.0      | -74.6                    | 5.2      |
| 3NUO | -1.83               | -59.0                    | 4.7      | -72.5                    | 5.3      | -76.2                    | 4.9      | -76.7                    | 4.9      | -76.8                    | 4.9      | -77.1                    | 5.0      | -72.5                    | 5.3      | -76.2                    | 4.9      |

Table S17. Predicted binding energies (kcal/mol) obtained from the analysis of the 1<sup>st</sup> ns of MD simulations run on GPU cards for the HIV1-protease system (RUN 2).

| Cmp  | ln(k <sub>i</sub> ) | Nwat = 0                 |          | Nwat = 10                |          | Nwat = 20                |          | Nwat = 30                |          | Nwat = 40                |          | Nwat = 50                |          | Nwat = 60                |          | Nwat = 70                |          |
|------|---------------------|--------------------------|----------|--------------------------|----------|--------------------------|----------|--------------------------|----------|--------------------------|----------|--------------------------|----------|--------------------------|----------|--------------------------|----------|
|      |                     | $\Delta G_{\text{bind}}$ | $\sigma$ | $\Delta G_{\text{bind}}$ | $\sigma$ | $\Delta G_{\text{bind}}$ | $\sigma$ | $\Delta G_{\text{bind}}$ | $\sigma$ | $\Delta G_{\text{bind}}$ | $\sigma$ | $\Delta G_{\text{bind}}$ | $\sigma$ | $\Delta G_{\text{bind}}$ | $\sigma$ | $\Delta G_{\text{bind}}$ | $\sigma$ |
| 3NDW | -2.81               | -54.8                    | 4.7      | -64.5                    | 6.0      | -71.3                    | 6.2      | -77.7                    | 6.8      | -80.9                    | 6.6      | -82.6                    | 6.6      | -83.4                    | 6.6      | -83.5                    | 6.7      |
| 3NDX | -2.81               | -52.2                    | 4.1      | -61.3                    | 6.1      | -66.5                    | 6.2      | -73.5                    | 6.0      | -78.1                    | 6.0      | -80.6                    | 6.1      | -81.8                    | 6.1      | -82.3                    | 6.0      |
| 3NU3 | -1.90               | -45.3                    | 5.5      | -65.1                    | 6.1      | -73.5                    | 6.7      | -75.1                    | 6.7      | -75.0                    | 6.7      | -74.8                    | 6.8      | -74.8                    | 6.8      | -74.6                    | 6.8      |
| 3NU4 | 0.41                | -50.3                    | 5.6      | -62.3                    | 6.5      | -67.2                    | 6.3      | -67.9                    | 6.3      | -67.9                    | 6.3      | -67.8                    | 6.2      | -67.8                    | 6.2      | -67.7                    | 6.2      |
| 3NU5 | 1.50                | -52.0                    | 4.2      | -62.9                    | 4.8      | -67.8                    | 4.7      | -68.4                    | 4.8      | -68.4                    | 4.8      | -68.3                    | 4.9      | -68.2                    | 4.9      | -68.1                    | 5.0      |
| 3NU6 | -0.69               | -51.2                    | 4.6      | -64.3                    | 5.9      | -70.3                    | 6.7      | -71.1                    | 6.7      | -71.1                    | 6.6      | -70.9                    | 6.6      | -70.8                    | 6.6      | -70.6                    | 6.7      |
| 3NU9 | -0.11               | -47.5                    | 6.2      | -64.6                    | 6.4      | -69.4                    | 6.7      | -69.5                    | 6.4      | -69.5                    | 6.4      | -69.5                    | 6.5      | -69.3                    | 6.5      | -69.2                    | 6.6      |
| 3NUJ | -0.89               | -52.5                    | 4.9      | -68.9                    | 6.8      | -76.1                    | 5.7      | -78.0                    | 5.7      | -78.3                    | 5.8      | -78.2                    | 5.7      | -78.1                    | 5.7      | -78.0                    | 5.7      |
| 3NUO | -1.83               | -56.3                    | 4.4      | -71.2                    | 5.2      | -75.2                    | 5.4      | -75.6                    | 5.5      | -75.8                    | 5.6      | -76.0                    | 5.7      | -76.2                    | 5.7      | -76.2                    | 5.7      |

Table S18. Predicted binding energies (kcal/mol) obtained from the analysis of the 1<sup>st</sup> ns of MD simulations run on GPU cards for the HIV1-protease system (RUN 3).

| Cmp  | ln(k <sub>i</sub> ) | Nwat = 0                 |          | Nwat = 10                |          | Nwat = 20                |          | Nwat = 30                |          | Nwat = 40                |          | Nwat = 50                |          | Nwat = 60                |          | Nwat = 70                |          |
|------|---------------------|--------------------------|----------|--------------------------|----------|--------------------------|----------|--------------------------|----------|--------------------------|----------|--------------------------|----------|--------------------------|----------|--------------------------|----------|
|      |                     | $\Delta G_{\text{bind}}$ | $\sigma$ | $\Delta G_{\text{bind}}$ | $\sigma$ | $\Delta G_{\text{bind}}$ | $\sigma$ | $\Delta G_{\text{bind}}$ | $\sigma$ | $\Delta G_{\text{bind}}$ | $\sigma$ | $\Delta G_{\text{bind}}$ | $\sigma$ | $\Delta G_{\text{bind}}$ | $\sigma$ | $\Delta G_{\text{bind}}$ | $\sigma$ |
| 3NDW | -2.81               | -50.5                    | 3.8      | -62.8                    | 5.5      | -68.8                    | 5.8      | -74.8                    | 6.1      | -77.6                    | 6.4      | -79.1                    | 6.5      | -79.8                    | 6.5      | -80.0                    | 6.4      |
| 3NDX | -2.81               | -52.7                    | 5.0      | -63.9                    | 5.7      | -69.4                    | 6.1      | -76.2                    | 6.3      | -80.4                    | 6.2      | -82.4                    | 6.1      | -83.5                    | 6.0      | -84.0                    | 6.0      |
| 3NU3 | -1.90               | -53.0                    | 5.0      | -68.6                    | 5.7      | -72.4                    | 6.0      | -73.0                    | 5.9      | -73.3                    | 6.1      | -73.4                    | 6.1      | -73.4                    | 6.1      | -73.4                    | 6.1      |
| 3NU4 | 0.41                | -49.7                    | 5.1      | -62.1                    | 5.8      | -67.1                    | 5.9      | -67.7                    | 5.9      | -67.6                    | 6.0      | -67.7                    | 6.0      | -67.6                    | 6.0      | -67.5                    | 6.0      |
| 3NU5 | 1.50                | -52.9                    | 4.6      | -62.9                    | 5.9      | -68.7                    | 5.9      | -69.5                    | 6.0      | -69.5                    | 6.1      | -69.4                    | 6.2      | -69.2                    | 6.2      | -69.0                    | 6.2      |
| 3NU6 | -0.69               | -52.8                    | 3.9      | -64.4                    | 5.0      | -69.3                    | 5.1      | -70.3                    | 5.1      | -70.2                    | 5.0      | -70.1                    | 5.0      | -70.0                    | 5.0      | -69.9                    | 5.0      |
| 3NU9 | -0.11               | -52.1                    | 4.8      | -64.7                    | 6.2      | -69.5                    | 6.1      | -70.0                    | 6.1      | -70.0                    | 6.1      | -70.0                    | 6.1      | -69.9                    | 6.1      | -69.9                    | 6.1      |
| 3NUJ | -0.89               | -53.7                    | 5.3      | -66.2                    | 6.0      | -73.6                    | 5.1      | -75.6                    | 4.9      | -75.8                    | 4.8      | -75.7                    | 4.8      | -75.5                    | 4.8      | -75.3                    | 4.9      |
| 3NUO | -1.83               | -57.4                    | 4.8      | -69.4                    | 6.1      | -74.0                    | 5.9      | -74.4                    | 5.9      | -74.2                    | 5.8      | -74.4                    | 5.8      | -74.4                    | 5.8      | -74.3                    | 5.8      |

Table S19. Predicted binding energies (kcal/mol) obtained from the analysis of the 1<sup>st</sup> ns of MD simulations run on HPC for the HIV1-protease system (RUN 1).

| Cmp  | ln(k <sub>i</sub> ) | Nwat = 0                 |          | Nwat = 10                |          | Nwat = 20                |          | Nwat = 30                |          | Nwat = 40                |          | Nwat = 50                |          | Nwat = 60                |          | Nwat = 70                |          |
|------|---------------------|--------------------------|----------|--------------------------|----------|--------------------------|----------|--------------------------|----------|--------------------------|----------|--------------------------|----------|--------------------------|----------|--------------------------|----------|
|      |                     | $\Delta G_{\text{bind}}$ | $\sigma$ | $\Delta G_{\text{bind}}$ | $\sigma$ | $\Delta G_{\text{bind}}$ | $\sigma$ | $\Delta G_{\text{bind}}$ | $\sigma$ | $\Delta G_{\text{bind}}$ | $\sigma$ | $\Delta G_{\text{bind}}$ | $\sigma$ | $\Delta G_{\text{bind}}$ | $\sigma$ | $\Delta G_{\text{bind}}$ | $\sigma$ |
| 3NDW | -2.81               | -59.6                    | 5.0      | -66.5                    | 4.8      | -73.2                    | 5.4      | -77.2                    | 5.5      | -79.3                    | 5.7      | -80.3                    | 5.7      | -80.7                    | 5.8      | -80.7                    | 5.8      |
| 3NDX | -2.81               | -49.3                    | 3.4      | -60.0                    | 5.3      | -68.9                    | 5.7      | -76.9                    | 5.4      | -82.6                    | 5.4      | -84.7                    | 5.6      | -85.6                    | 5.7      | -86.0                    | 5.6      |
| 3NU3 | -1.90               | -52.7                    | 5.1      | -67.8                    | 5.7      | -72.5                    | 5.3      | -72.9                    | 5.1      | -73.0                    | 5.1      | -73.1                    | 5.2      | -73.1                    | 5.2      | -73.0                    | 5.2      |
| 3NU4 | 0.41                | -49.0                    | 4.7      | -66.5                    | 5.7      | -72.2                    | 5.9      | -72.8                    | 6.0      | -72.8                    | 6.0      | -72.7                    | 6.0      | -72.6                    | 6.0      | -72.5                    | 6.0      |
| 3NU5 | 1.50                | -51.8                    | 4.5      | -62.9                    | 5.2      | -68.3                    | 4.7      | -69.3                    | 4.8      | -69.5                    | 4.9      | -69.5                    | 4.9      | -69.5                    | 4.9      | -69.3                    | 5.0      |
| 3NU6 | -0.69               | -41.7                    | 4.0      | -61.6                    | 5.0      | -68.8                    | 5.0      | -69.4                    | 5.1      | -69.3                    | 5.1      | -69.2                    | 5.2      | -69.1                    | 5.2      | -68.9                    | 5.2      |
| 3NU9 | -0.11               | -40.4                    | 4.7      | -58.5                    | 5.9      | -64.6                    | 6.1      | -65.4                    | 6.1      | -65.5                    | 5.9      | -65.6                    | 6.0      | -65.7                    | 5.9      | -65.6                    | 5.9      |
| 3NUJ | -0.89               | -54.0                    | 3.7      | -69.1                    | 5.1      | -74.7                    | 5.0      | -75.7                    | 4.9      | -75.7                    | 4.9      | -75.4                    | 4.9      | -75.3                    | 5.0      | -75.1                    | 5.0      |
| 3NUO | -1.83               | -54.7                    | 4.2      | -68.9                    | 5.0      | -74.3                    | 4.9      | -75.0                    | 5.0      | -75.0                    | 5.1      | -75.0                    | 4.9      | -75.1                    | 5.0      | -75.0                    | 5.1      |

Table S20. Predicted binding energies (kcal/mol) obtained from the analysis of the 1st ns of MD simulations run on HPC for the HIV1-protease system (RUN 2).

| Cmp  | ln(k <sub>i</sub> ) | Nwat = 0                 |          | Nwat = 10                |          | Nwat = 20                |          | Nwat = 30                |          | Nwat = 40                |          | Nwat = 50                |          | Nwat = 60                |          | Nwat = 70                |          |
|------|---------------------|--------------------------|----------|--------------------------|----------|--------------------------|----------|--------------------------|----------|--------------------------|----------|--------------------------|----------|--------------------------|----------|--------------------------|----------|
|      |                     | $\Delta G_{\text{bind}}$ | $\sigma$ | $\Delta G_{\text{bind}}$ | $\sigma$ | $\Delta G_{\text{bind}}$ | $\sigma$ | $\Delta G_{\text{bind}}$ | $\sigma$ | $\Delta G_{\text{bind}}$ | $\sigma$ | $\Delta G_{\text{bind}}$ | $\sigma$ | $\Delta G_{\text{bind}}$ | $\sigma$ | $\Delta G_{\text{bind}}$ | $\sigma$ |
| 3NDW | -2.81               | -47.3                    | 3.6      | -66.5                    | 5.8      | -74.3                    | 6.1      | -80.4                    | 5.9      | -83.5                    | 5.7      | -84.9                    | 5.5      | -85.5                    | 5.6      | -85.6                    | 5.6      |
| 3NDX | -2.81               | -44.6                    | 3.3      | -58.7                    | 7.1      | -63.4                    | 6.5      | -70.2                    | 6.2      | -76.9                    | 6.4      | -81.3                    | 6.1      | -83.5                    | 6.0      | -84.7                    | 6.0      |
| 3NU3 | -1.90               | -49.6                    | 3.8      | -69.1                    | 5.3      | -75.1                    | 5.2      | -76.1                    | 5.3      | -76.3                    | 5.4      | -76.3                    | 5.4      | -76.1                    | 5.4      | -76.0                    | 5.4      |
| 3NU4 | 0.41                | -49.8                    | 4.7      | -66.5                    | 5.6      | -71.0                    | 5.7      | -71.2                    | 5.6      | -71.0                    | 5.7      | -70.8                    | 5.7      | -70.7                    | 5.7      | -70.6                    | 5.7      |
| 3NU5 | 1.50                | -52.0                    | 4.7      | -62.8                    | 5.4      | -67.9                    | 5.5      | -68.6                    | 5.3      | -68.7                    | 5.3      | -68.8                    | 5.3      | -68.8                    | 5.3      | -68.8                    | 5.3      |
| 3NU6 | -0.69               | -46.0                    | 6.5      | -60.2                    | 5.8      | -65.9                    | 5.6      | -67.0                    | 5.4      | -66.9                    | 5.3      | -66.7                    | 5.3      | -66.6                    | 5.3      | -66.5                    | 5.3      |
| 3NU9 | -0.11               | -51.6                    | 4.6      | -63.5                    | 5.2      | -68.1                    | 4.7      | -68.5                    | 4.8      | -68.7                    | 4.8      | -68.6                    | 4.9      | -68.6                    | 4.9      | -68.5                    | 5.0      |
| 3NUJ | -0.89               | -59.1                    | 4.2      | -70.2                    | 5.4      | -75.7                    | 5.5      | -76.9                    | 5.4      | -76.9                    | 5.4      | -76.8                    | 5.3      | -76.7                    | 5.4      | -76.6                    | 5.4      |
| 3NUO | -1.83               | -56.8                    | 5.1      | -71.1                    | 6.6      | -77.5                    | 6.5      | -78.2                    | 6.4      | -78.2                    | 6.4      | -78.3                    | 6.3      | -78.3                    | 6.3      | -78.2                    | 6.3      |

Table S21. Predicted binding energies (kcal/mol) obtained from the analysis of the 1<sup>st</sup> ns of MD simulations run on HPC for the HIV1-protease system (RUN 3).

| Cmp  | ln(k <sub>i</sub> ) | Nwat = 0                 |          | Nwat = 10                |          | Nwat = 20                |          | Nwat = 30                |          | Nwat = 40                |          | Nwat = 50                |          | Nwat = 60                |          | Nwat = 70                |          |
|------|---------------------|--------------------------|----------|--------------------------|----------|--------------------------|----------|--------------------------|----------|--------------------------|----------|--------------------------|----------|--------------------------|----------|--------------------------|----------|
|      |                     | $\Delta G_{\text{bind}}$ | $\sigma$ | $\Delta G_{\text{bind}}$ | $\sigma$ | $\Delta G_{\text{bind}}$ | $\sigma$ | $\Delta G_{\text{bind}}$ | $\sigma$ | $\Delta G_{\text{bind}}$ | $\sigma$ | $\Delta G_{\text{bind}}$ | $\sigma$ | $\Delta G_{\text{bind}}$ | $\sigma$ | $\Delta G_{\text{bind}}$ | $\sigma$ |
| 3NDW | -2.81               | -52.3                    | 4.7      | -67.1                    | 5.3      | -73.8                    | 5.3      | -79.3                    | 5.5      | -82.0                    | 5.4      | -83.3                    | 5.5      | -84.1                    | 5.5      | -84.3                    | 5.5      |
| 3NDX | -2.81               | -48.2                    | 3.6      | -61.8                    | 5.9      | -68.5                    | 5.9      | -76.8                    | 6.2      | -82.3                    | 5.8      | -84.9                    | 5.8      | -86.2                    | 5.6      | -86.7                    | 5.7      |
| 3NU3 | -1.90               | -49.2                    | 4.5      | -70.4                    | 5.9      | -76.0                    | 6.0      | -77.0                    | 6.2      | -77.3                    | 6.2      | -77.3                    | 6.2      | -77.3                    | 6.2      | -77.2                    | 6.2      |
| 3NU4 | 0.41                | -42.5                    | 4.1      | -61.4                    | 6.1      | -70.0                    | 6.8      | -71.8                    | 6.7      | -71.6                    | 6.6      | -71.5                    | 6.7      | -71.3                    | 6.6      | -71.0                    | 6.6      |
| 3NU5 | 1.50                | -53.9                    | 4.6      | -64.3                    | 5.4      | -69.7                    | 5.2      | -70.8                    | 5.1      | -70.8                    | 5.2      | -70.7                    | 5.3      | -70.6                    | 5.3      | -70.5                    | 5.3      |
| 3NU6 | -0.69               | -43.7                    | 4.3      | -61.2                    | 6.1      | -71.5                    | 5.7      | -76.5                    | 5.8      | -77.6                    | 6.1      | -77.7                    | 5.9      | -77.5                    | 5.8      | -77.1                    | 5.8      |
| 3NU9 | -0.11               | -47.9                    | 4.3      | -61.5                    | 6.6      | -67.9                    | 6.2      | -69.0                    | 5.7      | -69.1                    | 5.7      | -69.1                    | 5.7      | -69.2                    | 5.8      | -69.0                    | 5.9      |
| 3NUJ | -0.89               | -52.3                    | 3.7      | -70.1                    | 5.4      | -76.5                    | 5.1      | -77.2                    | 4.9      | -77.3                    | 4.9      | -77.3                    | 4.9      | -77.2                    | 5.0      | -77.2                    | 5.0      |
| 3NUO | -1.83               | -56.0                    | 4.3      | -68.2                    | 5.3      | -73.2                    | 5.2      | -74.1                    | 5.3      | -74.1                    | 5.3      | -74.2                    | 5.3      | -74.2                    | 5.4      | -74.1                    | 5.5      |

Table S22. Predicted binding energies (kcal/mol) obtained from the analysis of the 4<sup>th</sup> ns of MD simulations run on GPU for the HIV1-protease system (RUN 1).

| Cmp  | ln(k <sub>i</sub> ) | Nwat = 0                 |          | Nwat = 10                |          | Nwat = 20                |          | Nwat = 30                |          | Nwat = 40                |          | Nwat = 50                |          | Nwat = 60                |          | Nwat = 70                |          |
|------|---------------------|--------------------------|----------|--------------------------|----------|--------------------------|----------|--------------------------|----------|--------------------------|----------|--------------------------|----------|--------------------------|----------|--------------------------|----------|
|      |                     | $\Delta G_{\text{bind}}$ | $\sigma$ | $\Delta G_{\text{bind}}$ | $\sigma$ | $\Delta G_{\text{bind}}$ | $\sigma$ | $\Delta G_{\text{bind}}$ | $\sigma$ | $\Delta G_{\text{bind}}$ | $\sigma$ | $\Delta G_{\text{bind}}$ | $\sigma$ | $\Delta G_{\text{bind}}$ | $\sigma$ | $\Delta G_{\text{bind}}$ | $\sigma$ |
| 3NDW | -2.81               | -61.1                    | 3.9      | -70.6                    | 5.3      | -77.8                    | 5.1      | -84.3                    | 5.2      | -87.0                    | 5.2      | -88.5                    | 5.5      | -89.1                    | 5.6      | -89.3                    | 5.6      |
| 3NDX | -2.81               | -54.1                    | 3.9      | -70.9                    | 5.6      | -76.4                    | 5.7      | -83.6                    | 5.9      | -88.1                    | 6.0      | -89.9                    | 5.9      | -90.9                    | 6.0      | -91.5                    | 6.1      |
| 3NU3 | -1.90               | -40.2                    | 3.9      | -65.0                    | 6.2      | -76.3                    | 6.1      | -78.9                    | 6.0      | -79.6                    | 6.1      | -79.9                    | 6.2      | -79.9                    | 6.2      | -79.8                    | 6.3      |
| 3NU4 | 0.41                | -41.9                    | 3.6      | -60.8                    | 5.2      | -71.5                    | 5.7      | -74.6                    | 5.4      | -75.4                    | 5.2      | -75.9                    | 5.2      | -75.9                    | 5.2      | -75.9                    | 5.2      |
| 3NU5 | 1.50                | -52.6                    | 4.3      | -65.0                    | 4.9      | -69.1                    | 4.8      | -69.5                    | 4.9      | -69.7                    | 5.0      | -69.9                    | 4.9      | -69.9                    | 5.0      | -69.9                    | 5.0      |
| 3NU6 | -0.69               | -33.5                    | 3.1      | -44.8                    | 5.1      | -55.0                    | 4.9      | -63.6                    | 4.8      | -67.1                    | 4.8      | -68.0                    | 4.6      | -67.6                    | 4.5      | -67.0                    | 4.5      |
| 3NU9 | -0.11               | -48.4                    | 3.8      | -68.7                    | 5.2      | -73.8                    | 5.0      | -74.0                    | 5.2      | -73.8                    | 5.2      | -73.8                    | 5.2      | -73.9                    | 5.3      | -73.9                    | 5.3      |
| 3NUJ | -0.89               | -49.7                    | 3.6      | -68.1                    | 5.3      | -76.4                    | 5.0      | -78.3                    | 5.3      | -78.4                    | 5.4      | -78.3                    | 5.4      | -78.2                    | 5.4      | -78.1                    | 5.4      |
| 3NUO | -1.83               | -57.3                    | 3.7      | -71.7                    | 4.9      | -76.3                    | 5.1      | -76.9                    | 4.9      | -76.9                    | 4.9      | -77.0                    | 4.9      | -77.1                    | 4.9      | -77.1                    | 4.9      |

Table S23. Predicted binding energies (kcal/mol) obtained from the analysis of the 4<sup>th</sup> ns of MD simulations run on GPU for the HIV1-protease system (RUN 2).

| Cmp  | ln(k <sub>i</sub> ) | Nwat = 0                 |          | Nwat = 10                |          | Nwat = 20                |          | Nwat = 30                |          | Nwat = 40                |          | Nwat = 50                |          | Nwat = 60                |          | Nwat = 70                |          |
|------|---------------------|--------------------------|----------|--------------------------|----------|--------------------------|----------|--------------------------|----------|--------------------------|----------|--------------------------|----------|--------------------------|----------|--------------------------|----------|
|      |                     | $\Delta G_{\text{bind}}$ | $\sigma$ | $\Delta G_{\text{bind}}$ | $\sigma$ | $\Delta G_{\text{bind}}$ | $\sigma$ | $\Delta G_{\text{bind}}$ | $\sigma$ | $\Delta G_{\text{bind}}$ | $\sigma$ | $\Delta G_{\text{bind}}$ | $\sigma$ | $\Delta G_{\text{bind}}$ | $\sigma$ | $\Delta G_{\text{bind}}$ | $\sigma$ |
| 3NDW | -2.81               | -47.3                    | 3.0      | -64.0                    | 5.1      | -74.2                    | 6.2      | -83.1                    | 6.3      | -88.0                    | 6.0      | -89.9                    | 6.0      | -90.9                    | 5.9      | -91.3                    | 5.9      |
| 3NDX | -2.81               | -44.6                    | 3.6      | -56.8                    | 5.5      | -63.4                    | 5.8      | -70.4                    | 6.1      | -75.8                    | 6.2      | -78.1                    | 6.2      | -78.8                    | 6.2      | -79.4                    | 6.3      |
| 3NU3 | -1.90               | -48.7                    | 3.9      | -71.4                    | 5.4      | -78.8                    | 5.6      | -79.7                    | 5.5      | -80.0                    | 5.4      | -80.1                    | 5.4      | -80.2                    | 5.4      | -80.2                    | 5.4      |
| 3NU4 | 0.41                | -40.9                    | 3.6      | -62.3                    | 5.9      | -72.2                    | 6.0      | -74.2                    | 5.9      | -74.9                    | 6.2      | -74.9                    | 6.2      | -74.7                    | 6.3      | -74.5                    | 6.3      |
| 3NU5 | 1.50                | -55.5                    | 3.6      | -66.6                    | 4.1      | -71.1                    | 4.2      | -71.7                    | 4.3      | -71.8                    | 4.3      | -71.8                    | 4.2      | -71.8                    | 4.3      | -71.7                    | 4.3      |
| 3NU6 | -0.69               | -47.8                    | 4.1      | -64.5                    | 5.4      | -71.7                    | 5.6      | -72.5                    | 5.5      | -72.6                    | 5.5      | -72.4                    | 5.5      | -72.3                    | 5.6      | -72.2                    | 5.5      |
| 3NU9 | -0.11               | -46.0                    | 4.7      | -64.9                    | 5.6      | -70.3                    | 5.4      | -70.7                    | 5.5      | -70.6                    | 5.5      | -70.5                    | 5.5      | -70.4                    | 5.7      | -70.4                    | 5.7      |
| 3NUJ | -0.89               | -50.6                    | 3.2      | -65.8                    | 5.0      | -76.4                    | 4.9      | -78.7                    | 5.1      | -78.9                    | 5.1      | -78.8                    | 5.1      | -78.6                    | 5.1      | -78.5                    | 5.0      |
| 3NUO | -1.83               | -55.0                    | 3.9      | -77.3                    | 5.4      | -84.8                    | 5.4      | -85.4                    | 5.3      | -85.2                    | 5.4      | -85.3                    | 5.3      | -85.4                    | 5.4      | -85.5                    | 5.4      |

Table S24. Predicted binding energies (kcal/mol) obtained from the analysis of the 4<sup>th</sup> ns of MD simulations run on GPU for the HIV1-protease system (RUN 3).

| Cmp  | ln(k <sub>i</sub> ) | Nwat = 0          |          | Nwat = 10         |          | Nwat = 20         |          | Nwat = 30         |          | Nwat = 40         |          | Nwat = 50         |          | Nwat = 60         |          | Nwat = 70         |          |
|------|---------------------|-------------------|----------|-------------------|----------|-------------------|----------|-------------------|----------|-------------------|----------|-------------------|----------|-------------------|----------|-------------------|----------|
|      |                     | $\Delta G_{bind}$ | $\sigma$ | $\Delta G_{bind}$ | $\sigma$ | $\Delta G_{bind}$ | $\sigma$ | $\Delta G_{bind}$ | $\sigma$ | $\Delta G_{bind}$ | $\sigma$ | $\Delta G_{bind}$ | $\sigma$ | $\Delta G_{bind}$ | $\sigma$ | $\Delta G_{bind}$ | $\sigma$ |
| 3NDW | -2.81               | -48.2             | 3.9      | -68.0             | 5.4      | -75.6             | 5.5      | -82.3             | 5.6      | -85.7             | 5.6      | -87.1             | 5.6      | -87.7             | 5.7      | -87.9             | -87.7    |
| 3NDX | -2.81               | -49.5             | 4.2      | -62.5             | 5.4      | -68.4             | 6.2      | -76.1             | 5.8      | -82.0             | 5.6      | -84.8             | 5.3      | -86.2             | 5.3      | -87.0             | -86.2    |
| 3NU3 | -1.90               | -37.7             | 5.1      | -56.4             | 5.4      | -67.8             | 5.6      | -70.9             | 5.8      | -71.2             | 5.7      | -71.0             | 5.5      | -70.8             | 5.6      | -70.7             | -70.8    |
| 3NU4 | 0.41                | -43.1             | 5.1      | -64.2             | 7.4      | -75.5             | 7.2      | -79.4             | 6.1      | -80.0             | 5.9      | -80.0             | 5.9      | -79.9             | 5.9      | -79.6             | -79.9    |
| 3NU5 | 1.50                | -50.5             | 4.7      | -61.9             | 6.1      | -67.3             | 5.7      | -67.9             | 5.6      | -67.8             | 5.7      | -67.7             | 5.8      | -67.7             | 5.9      | -67.8             | -67.7    |
| 3NU6 | -0.69               | -54.8             | 4.7      | -68.1             | 5.8      | -72.9             | 5.8      | -73.4             | 5.7      | -73.2             | 5.6      | -73.1             | 5.6      | -73.2             | 5.6      | -73.1             | -73.2    |
| 3NU9 | -0.11               | -44.5             | 5.3      | -62.0             | 6.2      | -72.1             | 5.3      | -75.0             | 5.3      | -74.8             | 5.2      | -74.4             | 5.1      | -74.1             | 5.1      | -73.8             | -74.1    |
| 3NUJ | -0.89               | -53.8             | 3.9      | -66.2             | 5.6      | -75.9             | 5.4      | -79.2             | 5.8      | -79.6             | 5.7      | -79.5             | 5.9      | -79.2             | 5.8      | -79.0             | -79.2    |
| 3NUO | -1.83               | -51.2             | 4.4      | -70.1             | 6.5      | -76.8             | 6.0      | -77.9             | 6.1      | -77.8             | 6.0      | -77.7             | 6.1      | -77.7             | 6.1      | -77.7             | -77.7    |

Table S25. Predicted binding energies (kcal/mol) obtained from the analysis of the 4<sup>th</sup> ns of MD simulations run on HPC for the HIV1-protease system (RUN 1).

| Cmp  | ln(k <sub>i</sub> ) | Nwat = 0          |          | Nwat = 10         |          | Nwat = 20         |          | Nwat = 30         |          | Nwat = 40         |          | Nwat = 50         |          | Nwat = 60         |          | Nwat = 70         |          |
|------|---------------------|-------------------|----------|-------------------|----------|-------------------|----------|-------------------|----------|-------------------|----------|-------------------|----------|-------------------|----------|-------------------|----------|
|      |                     | $\Delta G_{bind}$ | $\sigma$ | $\Delta G_{bind}$ | $\sigma$ | $\Delta G_{bind}$ | $\sigma$ | $\Delta G_{bind}$ | $\sigma$ | $\Delta G_{bind}$ | $\sigma$ | $\Delta G_{bind}$ | $\sigma$ | $\Delta G_{bind}$ | $\sigma$ | $\Delta G_{bind}$ | $\sigma$ |
| 3NDW | -2.81               | -52.9             | 3.2      | -67.1             | 5.7      | -76.0             | 5.3      | -82.5             | 5.1      | -85.7             | 5.1      | -87.4             | 5.0      | -88.4             | 5.1      | -88.7             | 5.0      |
| 3NDX | -2.81               | -43.0             | 3.2      | -61.2             | 7.2      | -68.9             | 7.5      | -78.0             | 7.2      | -84.3             | 6.6      | -86.6             | 6.2      | -87.6             | 6.1      | -88.1             | 6.1      |
| 3NU3 | -1.90               | -48.3             | 3.6      | -70.3             | 5.9      | -78.6             | 5.9      | -80.9             | 6.0      | -81.1             | 6.0      | -81.0             | 5.9      | -80.9             | 6.0      | -80.8             | 6.0      |
| 3NU4 | 0.41                | -49.9             | 3.9      | -65.7             | 5.6      | -71.4             | 5.6      | -72.1             | 5.5      | -71.9             | 5.7      | -71.7             | 5.6      | -71.7             | 5.6      | -71.5             | 5.7      |
| 3NU5 | 1.50                | -31.3             | 4.2      | -50.5             | 7.1      | -63.0             | 7.1      | -71.3             | 6.9      | -74.2             | 6.6      | -74.2             | 6.4      | -73.4             | 6.5      | -72.7             | 6.4      |
| 3NU6 | -0.69               | -44.8             | 4.5      | -64.9             | 6.1      | -73.6             | 5.5      | -75.1             | 5.5      | -75.2             | 5.4      | -75.0             | 5.5      | -74.8             | 5.6      | -74.6             | 5.6      |
| 3NU9 | -0.11               | -37.4             | 2.8      | -53.6             | 5.5      | -64.0             | 5.8      | -71.7             | 5.8      | -74.2             | 5.7      | -74.8             | 5.5      | -74.8             | 5.5      | -74.5             | 5.3      |
| 3NUJ | -0.89               | -53.6             | 3.7      | -68.6             | 5.2      | -74.8             | 5.2      | -76.2             | 5.3      | -76.3             | 5.3      | -76.2             | 5.4      | -76.0             | 5.4      | -75.9             | 5.4      |
| 3NUO | -1.83               | -56.6             | 4.3      | -71.2             | 5.7      | -76.2             | 5.4      | -76.8             | 5.3      | -76.9             | 5.3      | -77.1             | 5.3      | -77.1             | 5.4      | -77.1             | 5.5      |



Table S26. Predicted binding energies (kcal/mol) obtained from the analysis of the 4<sup>th</sup> ns of MD simulations run on HPC for the HIV1-protease system (RUN 2).

| Cmp  | ln(k <sub>i</sub> ) | Nwat = 0          |          | Nwat = 10         |          | Nwat = 20         |          | Nwat = 30         |          | Nwat = 40         |          | Nwat = 50         |          | Nwat = 60         |          | Nwat = 70         |          |
|------|---------------------|-------------------|----------|-------------------|----------|-------------------|----------|-------------------|----------|-------------------|----------|-------------------|----------|-------------------|----------|-------------------|----------|
|      |                     | $\Delta G_{bind}$ | $\sigma$ | $\Delta G_{bind}$ | $\sigma$ | $\Delta G_{bind}$ | $\sigma$ | $\Delta G_{bind}$ | $\sigma$ | $\Delta G_{bind}$ | $\sigma$ | $\Delta G_{bind}$ | $\sigma$ | $\Delta G_{bind}$ | $\sigma$ | $\Delta G_{bind}$ | $\sigma$ |
| 3NDW | -2.81               | -48.7             | 3.6      | -68.7             | 6.0      | -76.0             | 6.0      | -81.9             | 6.0      | -84.8             | 6.1      | -86.1             | 6.2      | -86.6             | 6.1      | -86.7             | 6.1      |
| 3NDX | -2.81               | -40.5             | 3.9      | -61.0             | 5.9      | -67.5             | 6.7      | -75.3             | 6.7      | -82.1             | 6.1      | -86.0             | 5.5      | -87.7             | 5.6      | -88.6             | 5.6      |
| 3NU3 | -1.90               | -47.3             | 4.1      | -70.3             | 5.4      | -76.4             | 5.4      | -77.4             | 5.5      | -77.8             | 5.4      | -77.9             | 5.5      | -77.8             | 5.5      | -77.6             | 5.5      |
| 3NU4 | 0.41                | -42.7             | 5.6      | -60.0             | 6.8      | -67.0             | 5.4      | -67.8             | 5.4      | -67.6             | 5.5      | -67.5             | 5.6      | -67.5             | 5.6      | -67.4             | 5.7      |
| 3NU5 | 1.50                | -45.1             | 4.5      | -61.4             | 6.1      | -72.7             | 5.8      | -75.4             | 5.6      | -75.8             | 5.6      | -75.8             | 5.7      | -75.8             | 5.7      | -75.7             | 5.7      |
| 3NU6 | -0.69               | -46.4             | 4.8      | -63.8             | 6.1      | -69.7             | 6.1      | -70.4             | 6.2      | -70.3             | 6.3      | -70.2             | 6.3      | -70.0             | 6.3      | -69.9             | 6.3      |
| 3NU9 | -0.11               | -48.4             | 3.8      | -67.4             | 5.7      | -72.7             | 5.5      | -73.0             | 5.5      | -72.7             | 5.5      | -72.8             | 5.5      | -72.9             | 5.5      | -72.8             | 5.5      |
| 3NUJ | -0.89               | -58.4             | 4.2      | -69.7             | 5.8      | -77.6             | 5.8      | -79.9             | 5.9      | -80.3             | 5.9      | -80.3             | 5.8      | -80.0             | 5.8      | -79.8             | 5.9      |
| 3NUO | -1.83               | -56.5             | 4.0      | -69.4             | 5.1      | -77.7             | 4.9      | -79.3             | 4.8      | -79.5             | 5.0      | -79.4             | 4.9      | -79.3             | 5.0      | -79.2             | 5.0      |

Table S27. Predicted binding energies (kcal/mol) obtained from the analysis of the 4<sup>th</sup> ns of MD simulations run on HPC for the HIV1-protease system (RUN 3).

| Cmp  | ln(k <sub>i</sub> ) | Nwat = 0          |          | Nwat = 10         |          | Nwat = 20         |          | Nwat = 30         |          | Nwat = 40         |          | Nwat = 50         |          | Nwat = 60         |          | Nwat = 70         |          |
|------|---------------------|-------------------|----------|-------------------|----------|-------------------|----------|-------------------|----------|-------------------|----------|-------------------|----------|-------------------|----------|-------------------|----------|
|      |                     | $\Delta G_{bind}$ | $\sigma$ | $\Delta G_{bind}$ | $\sigma$ | $\Delta G_{bind}$ | $\sigma$ | $\Delta G_{bind}$ | $\sigma$ | $\Delta G_{bind}$ | $\sigma$ | $\Delta G_{bind}$ | $\sigma$ | $\Delta G_{bind}$ | $\sigma$ | $\Delta G_{bind}$ | $\sigma$ |
| 3NDW | -2.81               | -50.2             | 3.6      | -67.6             | 4.9      | -74.1             | 5.3      | -80.6             | 5.2      | -83.3             | 5.3      | -84.9             | 5.4      | -85.5             | 5.4      | -85.8             | 5.3      |
| 3NDX | -2.81               | -44.4             | 2.6      | -56.2             | 5.9      | -62.1             | 5.8      | -71.4             | 6.3      | -78.8             | 6.2      | -82.9             | 6.2      | -84.8             | 6.1      | -85.4             | 6.2      |
| 3NU3 | -1.90               | -42.5             | 2.9      | -62.5             | 4.6      | -71.2             | 4.4      | -72.7             | 4.4      | -74.0             | 4.4      | -74.4             | 4.4      | -74.4             | 4.4      | -74.3             | 4.5      |
| 3NU4 | 0.41                | -38.2             | 3.1      | -57.1             | 6.0      | -70.6             | 6.3      | -77.6             | 5.8      | -79.3             | 5.9      | -79.5             | 5.8      | -79.4             | 5.8      | -79.1             | 5.7      |
| 3NU5 | 1.50                | -53.6             | 4.6      | -64.2             | 5.3      | -69.7             | 5.6      | -70.2             | 5.6      | -70.4             | 5.7      | -70.3             | 5.6      | -70.2             | 5.5      | -70.0             | 5.5      |
| 3NU6 | -0.69               | -37.9             | 3.6      | -54.6             | 5.3      | -65.4             | 5.2      | -71.4             | 5.0      | -72.6             | 5.4      | -72.4             | 5.4      | -72.1             | 5.3      | -71.7             | 5.2      |
| 3NU9 | -0.11               | -39.4             | 3.3      | -48.4             | 5.5      | -61.5             | 6.1      | -67.3             | 6.0      | -68.0             | 5.9      | -67.8             | 5.9      | -67.7             | 5.9      | -67.9             | 5.8      |
| 3NUJ | -0.89               | -51.6             | 3.6      | -68.0             | 5.2      | -75.7             | 5.1      | -77.4             | 5.2      | -77.6             | 5.1      | -77.7             | 5.2      | -77.5             | 5.2      | -77.4             | 5.3      |
| 3NUO | -1.83               | -56.4             | 5.2      | -71.3             | 5.8      | -75.5             | 5.6      | -75.8             | 5.5      | -75.9             | 5.6      | -76.1             | 5.6      | -76.2             | 5.6      | -76.2             | 5.6      |

Table S28. Predicted binding energies (kcal/mol) obtained from the analysis of the 1<sup>st</sup> ns of MD simulations run on GPU for the BCL-X<sub>L</sub> system (RUN 1).

| Cmp  | log(IC <sub>50</sub> ) | Nwat = 0                 |          | Nwat = 10                |          | Nwat = 20                |          | Nwat = 30                |          | Nwat = 40                |          | Nwat = 50                |          |
|------|------------------------|--------------------------|----------|--------------------------|----------|--------------------------|----------|--------------------------|----------|--------------------------|----------|--------------------------|----------|
|      |                        | $\Delta G_{\text{bind}}$ | $\sigma$ | $\Delta G_{\text{bind}}$ | $\sigma$ | $\Delta G_{\text{bind}}$ | $\sigma$ | $\Delta G_{\text{bind}}$ | $\sigma$ | $\Delta G_{\text{bind}}$ | $\sigma$ | $\Delta G_{\text{bind}}$ | $\sigma$ |
| 3Z1B | 0.3                    | -48.0                    | 4.1      | -68.7                    | 5.6      | -73.9                    | 5.7      | -77.3                    | 5.8      | -79.3                    | 5.9      | -80.6                    | 6.0      |
| 3ZC4 | -1.6                   | -48.9                    | 4.4      | -68.6                    | 6.7      | -73.7                    | 6.6      | -77.4                    | 6.4      | -79.7                    | 6.5      | -81.3                    | 6.7      |
| 3ZC5 | -2.2                   | -67.2                    | 3.5      | -86.1                    | 5.6      | -91.0                    | 5.8      | -95.8                    | 6.0      | -98.7                    | 6.3      | -100.7                   | 6.3      |
| 3ZK6 | -0.1                   | -46.5                    | 3.2      | -51.5                    | 4.3      | -51.8                    | 4.7      | -54.2                    | 4.7      | -57.3                    | 4.8      | -60.1                    | 4.8      |
| 3ZLN | -1.6                   | -52.1                    | 2.5      | -72.5                    | 5.0      | -78.6                    | 5.1      | -82.2                    | 5.4      | -84.6                    | 5.5      | -86.5                    | 5.6      |
| 3ZLO | -2.8                   | -68.2                    | 4.2      | -87.3                    | 6.2      | -91.8                    | 6.3      | -95.8                    | 6.5      | -98.2                    | 6.5      | -100.0                   | 6.8      |
| 3ZLR | -3.0                   | -68.2                    | 4.2      | -87.3                    | 6.2      | -91.8                    | 6.3      | -95.8                    | 6.5      | -98.2                    | 6.6      | -100.0                   | 6.8      |

Table S29. Predicted binding energies (kcal/mol) obtained from the analysis of the 1<sup>st</sup> ns of MD simulations run on GPU for the BCL-X<sub>L</sub> system (RUN 2).

| Cmp  | log(IC <sub>50</sub> ) | Nwat = 0                 |          | Nwat = 10                |          | Nwat = 20                |          | Nwat = 30                |          | Nwat = 40                |          | Nwat = 50                |          |
|------|------------------------|--------------------------|----------|--------------------------|----------|--------------------------|----------|--------------------------|----------|--------------------------|----------|--------------------------|----------|
|      |                        | $\Delta G_{\text{bind}}$ | $\sigma$ | $\Delta G_{\text{bind}}$ | $\sigma$ | $\Delta G_{\text{bind}}$ | $\sigma$ | $\Delta G_{\text{bind}}$ | $\sigma$ | $\Delta G_{\text{bind}}$ | $\sigma$ | $\Delta G_{\text{bind}}$ | $\sigma$ |
| 3Z1B | 0.3                    | -42.9                    | 2.9      | -57.8                    | 5.0      | -66.0                    | 5.6      | -72.0                    | 6.3      | -74.9                    | 6.7      | -76.3                    | 6.9      |
| 3ZC4 | -1.6                   | -44.9                    | 3.4      | -59.5                    | 4.9      | -67.9                    | 5.5      | -74.2                    | 6.6      | -77.2                    | 7.2      | -78.5                    | 7.4      |
| 3ZC5 | -2.2                   | -59.1                    | 3.2      | -71.8                    | 5.1      | -80.9                    | 5.6      | -90.2                    | 6.3      | -97.5                    | 7.0      | -102.0                   | 7.3      |
| 3ZK6 | -0.1                   | -39.6                    | 3.6      | -39.9                    | 6.0      | -45.3                    | 6.5      | -55.4                    | 6.7      | -65.7                    | 6.3      | -73.5                    | 6.3      |
| 3ZLN | -1.6                   | -43.7                    | 2.9      | -58.3                    | 5.1      | -66.9                    | 5.4      | -74.6                    | 6.4      | -78.7                    | 6.9      | -80.8                    | 7.2      |
| 3ZLO | -2.8                   | -60.0                    | 3.3      | -73.3                    | 5.3      | -82.6                    | 5.7      | -91.5                    | 6.0      | -97.1                    | 6.0      | -100.2                   | 6.7      |
| 3ZLR | -3.0                   | -59.2                    | 3.7      | -86.9                    | 5.4      | -98.7                    | 6.3      | -109.6                   | 7.2      | -117.7                   | 7.8      | -122.2                   | 8.1      |

Table S30. Predicted binding energies (kcal/mol) obtained from the analysis of the 1<sup>st</sup> ns of MD simulations run on GPU for the BCL-X<sub>L</sub> system (RUN 3).

| Cmp  | log(IC <sub>50</sub> ) | Nwat = 0                 |          | Nwat = 10                |          | Nwat = 20                |          | Nwat = 30                |          | Nwat = 40                |          | Nwat = 50                |          |
|------|------------------------|--------------------------|----------|--------------------------|----------|--------------------------|----------|--------------------------|----------|--------------------------|----------|--------------------------|----------|
|      |                        | $\Delta G_{\text{bind}}$ | $\sigma$ | $\Delta G_{\text{bind}}$ | $\sigma$ | $\Delta G_{\text{bind}}$ | $\sigma$ | $\Delta G_{\text{bind}}$ | $\sigma$ | $\Delta G_{\text{bind}}$ | $\sigma$ | $\Delta G_{\text{bind}}$ | $\sigma$ |
| 3Z1B | 0.3                    | -49.0                    | 2.9      | -68.1                    | 5.3      | -73.0                    | 5.7      | -76.3                    | 6.1      | -78.4                    | 6.3      | -80.1                    | 6.4      |
| 3ZC4 | -1.6                   | -54.2                    | 4.0      | -73.5                    | 5.5      | -78.9                    | 5.4      | -81.8                    | 5.5      | -84.0                    | 5.7      | -85.6                    | 5.8      |
| 3ZC5 | -2.2                   | -69.5                    | 4.0      | -88.6                    | 6.1      | -93.9                    | 6.3      | -97.9                    | 6.4      | -100.5                   | 6.3      | -102.5                   | 6.4      |
| 3ZK6 | -0.1                   | -49.5                    | 3.4      | -54.0                    | 5.1      | -54.5                    | 5.2      | -57.2                    | 5.4      | -60.3                    | 5.7      | -62.4                    | 5.8      |
| 3ZLN | -1.6                   | -55.6                    | 3.0      | -72.9                    | 4.9      | -78.0                    | 5.0      | -81.2                    | 5.4      | -83.3                    | 5.5      | -85.1                    | 5.7      |
| 3ZLO | -2.8                   | -65.3                    | 4.1      | -84.1                    | 5.7      | -88.5                    | 6.0      | -92.6                    | 6.0      | -95.2                    | 6.0      | -97.0                    | 6.2      |
| 3ZLR | -3.0                   | -75.4                    | 3.8      | -104.5                   | 6.5      | -111.7                   | 6.7      | -117.3                   | 6.7      | -120.6                   | 6.8      | -122.7                   | 7.0      |

Table S31. Predicted binding energies (kcal/mol) obtained from the analysis of the 1<sup>st</sup> ns of MD simulations run on HPC for the BCL-X<sub>L</sub> system (RUN 1).

| Cmp  | log(IC <sub>50</sub> ) | Nwat = 0                 |          | Nwat = 10                |          | Nwat = 20                |          | Nwat = 30                |          | Nwat = 40                |          | Nwat = 50                |          |
|------|------------------------|--------------------------|----------|--------------------------|----------|--------------------------|----------|--------------------------|----------|--------------------------|----------|--------------------------|----------|
|      |                        | $\Delta G_{\text{bind}}$ | $\sigma$ | $\Delta G_{\text{bind}}$ | $\sigma$ | $\Delta G_{\text{bind}}$ | $\sigma$ | $\Delta G_{\text{bind}}$ | $\sigma$ | $\Delta G_{\text{bind}}$ | $\sigma$ | $\Delta G_{\text{bind}}$ | $\sigma$ |
| 3Z1B | 0.3                    | -42.5                    | 2.8      | -56.2                    | 4.9      | -64.6                    | 5.2      | -71.6                    | 6.1      | -75.2                    | 6.4      | -77.1                    | 6.5      |
| 3ZC4 | -1.6                   | -44.7                    | 3.0      | -58.6                    | 4.2      | -67.6                    | 5.2      | -75.0                    | 6.4      | -78.1                    | 6.6      | -79.6                    | 6.9      |
| 3ZC5 | -2.2                   | -61.3                    | 3.3      | -74.2                    | 5.6      | -84.0                    | 5.9      | -92.8                    | 6.6      | -98.9                    | 7.2      | -102.2                   | 7.3      |
| 3ZK6 | -0.1                   | -43.7                    | 4.0      | -45.6                    | 6.0      | -51.0                    | 7.0      | -61.2                    | 7.6      | -71.1                    | 7.3      | -78.3                    | 6.4      |
| 3ZLN | -1.6                   | -44.4                    | 3.0      | -59.5                    | 5.5      | -68.8                    | 5.7      | -75.8                    | 6.1      | -79.8                    | 6.4      | -81.7                    | 6.7      |
| 3ZLO | -2.8                   | -61.4                    | 3.6      | -75.0                    | 6.2      | -84.0                    | 6.7      | -92.2                    | 7.3      | -97.5                    | 7.3      | -100.5                   | 7.3      |
| 3ZLR | -3.0                   | -60.7                    | 4.3      | -88.6                    | 6.3      | -100.4                   | 6.5      | -111.6                   | 6.8      | -120.0                   | 7.4      | -124.5                   | 7.8      |

Table S32. Predicted binding energies (kcal/mol) obtained from the analysis of the 1<sup>st</sup> ns of MD simulations run on HPC for the BCL-X<sub>L</sub> system (RUN 2).

| Cmp  | log(IC <sub>50</sub> ) | Nwat = 0                 |          | Nwat = 10                |          | Nwat = 20                |          | Nwat = 30                |          | Nwat = 40                |          | Nwat = 50                |          |
|------|------------------------|--------------------------|----------|--------------------------|----------|--------------------------|----------|--------------------------|----------|--------------------------|----------|--------------------------|----------|
|      |                        | $\Delta G_{\text{bind}}$ | $\sigma$ | $\Delta G_{\text{bind}}$ | $\sigma$ | $\Delta G_{\text{bind}}$ | $\sigma$ | $\Delta G_{\text{bind}}$ | $\sigma$ | $\Delta G_{\text{bind}}$ | $\sigma$ | $\Delta G_{\text{bind}}$ | $\sigma$ |
| 3Z1B | 0.3                    | -42.5                    | 2.8      | -56.8                    | 4.5      | -65.5                    | 5.4      | -71.8                    | 5.9      | -75.7                    | 6.5      | -77.3                    | 6.8      |
| 3ZC4 | -1.6                   | -45.5                    | 3.4      | -60.1                    | 4.8      | -68.6                    | 5.8      | -74.8                    | 6.9      | -77.7                    | 7.3      | -79.2                    | 7.6      |
| 3ZC5 | -2.2                   | -62.0                    | 3.2      | -75.8                    | 5.2      | -85.9                    | 5.4      | -94.5                    | 6.4      | -100.1                   | 6.4      | -103.0                   | 6.8      |
| 3ZK6 | -0.1                   | -37.1                    | 3.6      | -37.9                    | 6.1      | -41.9                    | 7.3      | -52.0                    | 6.9      | -62.2                    | 6.6      | -70.9                    | 6.4      |
| 3ZLN | -1.6                   | -44.3                    | 3.2      | -59.5                    | 5.2      | -68.1                    | 5.4      | -75.6                    | 5.9      | -79.7                    | 6.3      | -81.8                    | 6.5      |
| 3ZLO | -2.8                   | -60.8                    | 3.6      | -74.7                    | 5.0      | -84.2                    | 5.6      | -92.5                    | 6.1      | -98.4                    | 6.1      | -101.1                   | 6.7      |
| 3ZLR | -3.0                   | -60.8                    | 3.3      | -89.1                    | 6.0      | -102.3                   | 6.3      | -114.0                   | 7.0      | -123.1                   | 7.4      | -127.4                   | 7.6      |

Table S33. Predicted binding energies (kcal/mol) obtained from the analysis of the 1<sup>st</sup> ns of MD simulations run on HPC for the BCL-X<sub>L</sub> system (RUN 3).

| Cmp  | log(IC <sub>50</sub> ) | Nwat = 0                 |          | Nwat = 10                |          | Nwat = 20                |          | Nwat = 30                |          | Nwat = 40                |          | Nwat = 50                |          |
|------|------------------------|--------------------------|----------|--------------------------|----------|--------------------------|----------|--------------------------|----------|--------------------------|----------|--------------------------|----------|
|      |                        | $\Delta G_{\text{bind}}$ | $\sigma$ | $\Delta G_{\text{bind}}$ | $\sigma$ | $\Delta G_{\text{bind}}$ | $\sigma$ | $\Delta G_{\text{bind}}$ | $\sigma$ | $\Delta G_{\text{bind}}$ | $\sigma$ | $\Delta G_{\text{bind}}$ | $\sigma$ |
| 3Z1B | 0.3                    | -43.8                    | 2.6      | -58.4                    | 5.0      | -66.6                    | 5.7      | -73.3                    | 6.6      | -76.3                    | 6.9      | -77.9                    | 7.2      |
| 3ZC4 | -1.6                   | -44.5                    | 3.7      | -56.4                    | 7.2      | -61.6                    | 11.2     | -66.3                    | 13.3     | -68.7                    | 14.0     | -69.8                    | 14.2     |
| 3ZC5 | -2.2                   | -61.6                    | 3.7      | -74.2                    | 5.8      | -83.5                    | 5.8      | -92.2                    | 6.7      | -97.7                    | 7.2      | -100.9                   | 7.4      |
| 3ZK6 | -0.1                   | -39.1                    | 3.4      | -38.4                    | 6.6      | -42.5                    | 7.1      | -52.6                    | 7.4      | -63.2                    | 7.0      | -71.7                    | 7.0      |
| 3ZLN | -1.6                   | -46.6                    | 2.6      | -60.5                    | 4.3      | -68.8                    | 5.2      | -75.5                    | 5.9      | -79.4                    | 6.4      | -81.3                    | 6.6      |
| 3ZLO | -2.8                   | -60.3                    | 3.3      | -72.6                    | 4.9      | -82.3                    | 5.3      | -90.5                    | 5.8      | -96.3                    | 5.8      | -99.4                    | 6.6      |
| 3ZLR | -3.0                   | -66.3                    | 4.0      | -91.6                    | 6.6      | -103.5                   | 7.1      | -113.5                   | 7.7      | -120.2                   | 8.1      | -123.4                   | 8.3      |

Table S34. Predicted binding energies (kcal/mol) obtained from the analysis of the 4<sup>th</sup> ns of MD simulations run on GPU for the BCL-X<sub>L</sub> system (RUN 1).

| Cmp  | log(IC <sub>50</sub> ) | Nwat = 0                 |          | Nwat = 10                |          | Nwat = 20                |          | Nwat = 30                |          | Nwat = 40                |          | Nwat = 50                |          |
|------|------------------------|--------------------------|----------|--------------------------|----------|--------------------------|----------|--------------------------|----------|--------------------------|----------|--------------------------|----------|
|      |                        | $\Delta G_{\text{bind}}$ | $\sigma$ | $\Delta G_{\text{bind}}$ | $\sigma$ | $\Delta G_{\text{bind}}$ | $\sigma$ | $\Delta G_{\text{bind}}$ | $\sigma$ | $\Delta G_{\text{bind}}$ | $\sigma$ | $\Delta G_{\text{bind}}$ | $\sigma$ |
| 3Z1B | 0.3                    | -41.3                    | 3.0      | -57.3                    | 4.3      | -66.4                    | 5.4      | -74.1                    | 6.5      | -78.0                    | 7.1      | -79.7                    | 7.3      |
| 3ZC4 | -1.6                   | -39.8                    | 2.5      | -55.4                    | 4.7      | -64.3                    | 5.5      | -72.4                    | 6.5      | -77.8                    | 7.2      | -80.1                    | 7.5      |
| 3ZC5 | -2.2                   | -59.4                    | 3.8      | -72.6                    | 5.4      | -81.6                    | 5.8      | -91.3                    | 6.7      | -99.2                    | 7.4      | -103.6                   | 7.5      |
| 3ZK6 | -0.1                   | -39.6                    | 3.2      | -39.5                    | 5.7      | -43.3                    | 6.0      | -53.1                    | 6.2      | -64.3                    | 6.3      | -74.0                    | 6.0      |
| 3ZLN | -1.6                   | -39.7                    | 2.5      | -55.1                    | 4.8      | -65.4                    | 5.1      | -73.9                    | 5.6      | -79.3                    | 6.0      | -82.0                    | 6.2      |
| 3ZLO | -2.8                   | -60.8                    | 2.9      | -74.1                    | 5.5      | -83.7                    | 5.7      | -91.7                    | 6.4      | -96.9                    | 6.4      | -99.4                    | 6.8      |
| 3ZLR | -3.0                   | -64.9                    | 4.3      | -90.0                    | 6.2      | -100.8                   | 5.9      | -111.7                   | 6.4      | -119.4                   | 6.8      | -123.2                   | 7.0      |

Table S35. Predicted binding energies (kcal/mol) obtained from the analysis of the 4<sup>th</sup> ns of MD simulations run on GPU for the BCL-X<sub>L</sub> system (RUN 2).

| Cmp  | log(IC <sub>50</sub> ) | Nwat = 0                 |          | Nwat = 10                |          | Nwat = 20                |          | Nwat = 30                |          | Nwat = 40                |          | Nwat = 50                |          |
|------|------------------------|--------------------------|----------|--------------------------|----------|--------------------------|----------|--------------------------|----------|--------------------------|----------|--------------------------|----------|
|      |                        | $\Delta G_{\text{bind}}$ | $\sigma$ | $\Delta G_{\text{bind}}$ | $\sigma$ | $\Delta G_{\text{bind}}$ | $\sigma$ | $\Delta G_{\text{bind}}$ | $\sigma$ | $\Delta G_{\text{bind}}$ | $\sigma$ | $\Delta G_{\text{bind}}$ | $\sigma$ |
| 3Z1B | 0.3                    | -41.9                    | 2.9      | -55.1                    | 5.0      | -63.9                    | 5.3      | -70.7                    | 6.1      | -74.2                    | 6.5      | -75.9                    | 6.8      |
| 3ZC4 | -1.6                   | -44.2                    | 3.3      | -58.7                    | 4.3      | -67.4                    | 5.1      | -74.0                    | 6.0      | -77.5                    | 6.4      | -79.2                    | 6.6      |
| 3ZC5 | -2.2                   | -58.1                    | 3.9      | -72.7                    | 5.8      | -82.2                    | 6.2      | -91.8                    | 6.5      | -98.8                    | 6.9      | -102.4                   | 7.0      |
| 3ZK6 | -0.1                   | -41.8                    | 3.5      | -43.5                    | 6.0      | -49.8                    | 7.0      | -60.0                    | 6.9      | -69.3                    | 6.6      | -76.1                    | 6.3      |
| 3ZLN | -1.6                   | -44.3                    | 2.6      | -60.2                    | 4.8      | -69.1                    | 5.2      | -76.2                    | 6.1      | -80.4                    | 6.5      | -82.5                    | 6.7      |
| 3ZLO | -2.8                   | -60.8                    | 3.4      | -73.9                    | 5.6      | -82.7                    | 6.2      | -90.5                    | 6.8      | -95.5                    | 6.8      | -98.4                    | 7.4      |
| 3ZLR | -3.0                   | -64.4                    | 3.8      | -89.5                    | 6.8      | -100.6                   | 6.4      | -110.8                   | 7.1      | -118.0                   | 7.3      | -121.8                   | 7.6      |

Table S36. Predicted binding energies (kcal/mol) obtained from the analysis of the 4<sup>th</sup> ns of MD simulations run on GPU for the BCL-X<sub>L</sub> system (RUN 3).

| Cmp  | log(IC <sub>50</sub> ) | Nwat = 0                 |          | Nwat = 10                |          | Nwat = 20                |          | Nwat = 30                |          | Nwat = 40                |          | Nwat = 50                |          |
|------|------------------------|--------------------------|----------|--------------------------|----------|--------------------------|----------|--------------------------|----------|--------------------------|----------|--------------------------|----------|
|      |                        | $\Delta G_{\text{bind}}$ | $\sigma$ | $\Delta G_{\text{bind}}$ | $\sigma$ | $\Delta G_{\text{bind}}$ | $\sigma$ | $\Delta G_{\text{bind}}$ | $\sigma$ | $\Delta G_{\text{bind}}$ | $\sigma$ | $\Delta G_{\text{bind}}$ | $\sigma$ |
| 3Z1B | 0.3                    | -48.5                    | 3.0      | -66.6                    | 5.7      | -71.2                    | 6.1      | -74.2                    | 6.4      | -76.4                    | 6.5      | -77.9                    | 6.6      |
| 3ZC4 | -1.6                   | -53.4                    | 3.7      | -73.3                    | 5.3      | -78.5                    | 5.4      | -81.6                    | 5.4      | -83.9                    | 5.6      | -85.5                    | 5.8      |
| 3ZC5 | -2.2                   | -71.2                    | 3.4      | -91.4                    | 5.7      | -97.6                    | 5.7      | -101.8                   | 5.9      | -104.3                   | 6.1      | -106.2                   | 6.0      |
| 3ZK6 | -0.1                   | -50.8                    | 3.4      | -56.1                    | 4.6      | -57.3                    | 4.8      | -60.3                    | 5.0      | -63.1                    | 5.0      | -65.1                    | 5.0      |
| 3ZLN | -1.6                   | -55.1                    | 3.3      | -73.7                    | 5.9      | -78.5                    | 5.9      | -81.6                    | 6.1      | -83.9                    | 6.4      | -85.8                    | 6.4      |
| 3ZLO | -2.8                   | -65.8                    | 4.2      | -84.3                    | 6.8      | -88.3                    | 6.4      | -92.3                    | 6.4      | -94.8                    | 6.4      | -96.7                    | 6.5      |
| 3ZLR | -3.0                   | -75.5                    | 3.4      | -105.9                   | 5.9      | -112.7                   | 6.1      | -118.3                   | 6.3      | -121.3                   | 6.5      | -123.4                   | 6.8      |

Table S37. Predicted binding energies (kcal/mol) obtained from the analysis of the 4<sup>th</sup> ns of MD simulations run on HPC for the BCL-X<sub>L</sub> system (RUN 1).

| Cmp  | log(IC <sub>50</sub> ) | Nwat = 0                 |          | Nwat = 10                |          | Nwat = 20                |          | Nwat = 30                |          | Nwat = 40                |          | Nwat = 50                |          |
|------|------------------------|--------------------------|----------|--------------------------|----------|--------------------------|----------|--------------------------|----------|--------------------------|----------|--------------------------|----------|
|      |                        | $\Delta G_{\text{bind}}$ | $\sigma$ | $\Delta G_{\text{bind}}$ | $\sigma$ | $\Delta G_{\text{bind}}$ | $\sigma$ | $\Delta G_{\text{bind}}$ | $\sigma$ | $\Delta G_{\text{bind}}$ | $\sigma$ | $\Delta G_{\text{bind}}$ | $\sigma$ |
| 3Z1B | 0.3                    | -42.1                    | 3.2      | -54.4                    | 4.9      | -62.9                    | 5.4      | -69.3                    | 5.9      | -73.0                    | 6.5      | -74.8                    | 6.9      |
| 3ZC4 | -1.6                   | -40.1                    | 2.6      | -55.7                    | 5.1      | -64.8                    | 5.5      | -73.3                    | 6.4      | -78.5                    | 7.0      | -80.6                    | 7.4      |
| 3ZC5 | -2.2                   | -60.7                    | 3.0      | -74.1                    | 4.9      | -83.7                    | 5.7      | -92.6                    | 6.2      | -98.6                    | 6.3      | -102.2                   | 6.6      |
| 3ZK6 | -0.1                   | -42.5                    | 3.9      | -44.0                    | 6.3      | -49.2                    | 6.8      | -58.7                    | 7.0      | -69.0                    | 6.7      | -76.7                    | 6.6      |
| 3ZLN | -1.6                   | -45.3                    | 3.0      | -59.6                    | 4.6      | -67.9                    | 5.1      | -74.9                    | 6.0      | -79.1                    | 6.4      | -81.1                    | 6.8      |
| 3ZLO | -2.8                   | -61.6                    | 3.5      | -74.8                    | 5.5      | -83.5                    | 5.9      | -91.8                    | 6.7      | -97.0                    | 7.2      | -100.0                   | 7.2      |
| 3ZLR | -3.0                   | -59.8                    | 3.2      | -88.1                    | 5.7      | -100.5                   | 5.6      | -112.0                   | 6.3      | -119.8                   | 6.4      | -124.1                   | 6.9      |

Table S38. Predicted binding energies (kcal/mol) obtained from the analysis of the 4<sup>th</sup> ns of MD simulations run on HPC for the BCL-X<sub>L</sub> system (RUN 2).

| Cmp  | log(IC <sub>50</sub> ) | Nwat = 0                 |          | Nwat = 10                |          | Nwat = 20                |          | Nwat = 30                |          | Nwat = 40                |          | Nwat = 50                |          |
|------|------------------------|--------------------------|----------|--------------------------|----------|--------------------------|----------|--------------------------|----------|--------------------------|----------|--------------------------|----------|
|      |                        | $\Delta G_{\text{bind}}$ | $\sigma$ | $\Delta G_{\text{bind}}$ | $\sigma$ | $\Delta G_{\text{bind}}$ | $\sigma$ | $\Delta G_{\text{bind}}$ | $\sigma$ | $\Delta G_{\text{bind}}$ | $\sigma$ | $\Delta G_{\text{bind}}$ | $\sigma$ |
| 3Z1B | 0.3                    | -42.7                    | 3.2      | -57.7                    | 5.5      | -65.8                    | 5.5      | -72.1                    | 6.2      | -75.3                    | 6.3      | -76.8                    | 6.5      |
| 3ZC4 | -1.6                   | -45.6                    | 3.5      | -59.7                    | 4.4      | -68.2                    | 4.9      | -74.6                    | 5.8      | -77.8                    | 6.1      | -79.3                    | 6.2      |
| 3ZC5 | -2.2                   | -60.9                    | 3.4      | -73.4                    | 5.0      | -83.3                    | 5.4      | -92.9                    | 6.0      | -99.5                    | 6.4      | -103.3                   | 6.7      |
| 3ZK6 | -0.1                   | -39.4                    | 3.3      | -40.3                    | 5.2      | -44.7                    | 6.1      | -54.3                    | 6.3      | -64.4                    | 5.8      | -72.0                    | 5.7      |
| 3ZLN | -1.6                   | -46.5                    | 2.5      | -59.1                    | 4.8      | -67.3                    | 5.0      | -74.2                    | 6.1      | -78.1                    | 6.7      | -80.0                    | 7.1      |
| 3ZLO | -2.8                   | -57.7                    | 3.5      | -70.0                    | 5.8      | -78.3                    | 6.2      | -86.8                    | 6.5      | -93.2                    | 6.5      | -97.2                    | 7.3      |
| 3ZLR | -3.0                   | -66.4                    | 4.0      | -90.6                    | 7.0      | -101.9                   | 7.2      | -112.2                   | 8.0      | -119.3                   | 8.5      | -122.8                   | 8.8      |

Table S39. Predicted binding energies (kcal/mol) obtained from the analysis of the 4<sup>th</sup> ns of MD simulations run on HPC for the BCL-X<sub>L</sub> system (RUN 3).

| Cmp  | log(IC <sub>50</sub> ) | Nwat = 0                 |          | Nwat = 10                |          | Nwat = 20                |          | Nwat = 30                |          | Nwat = 40                |          | Nwat = 50                |          |
|------|------------------------|--------------------------|----------|--------------------------|----------|--------------------------|----------|--------------------------|----------|--------------------------|----------|--------------------------|----------|
|      |                        | $\Delta G_{\text{bind}}$ | $\sigma$ | $\Delta G_{\text{bind}}$ | $\sigma$ | $\Delta G_{\text{bind}}$ | $\sigma$ | $\Delta G_{\text{bind}}$ | $\sigma$ | $\Delta G_{\text{bind}}$ | $\sigma$ | $\Delta G_{\text{bind}}$ | $\sigma$ |
| 3Z1B | 0.3                    | -41.6                    | 2.7      | -58.2                    | 4.9      | -68.8                    | 5.5      | -76.1                    | 6.5      | -80.1                    | 6.7      | -82.1                    | 6.8      |
| 3ZC4 | -1.6                   | -42.1                    | 3.2      | -59.0                    | 4.4      | -68.3                    | 5.0      | -75.9                    | 6.1      | -79.5                    | 6.1      | -81.3                    | 6.2      |
| 3ZC5 | -2.2                   | -62.4                    | 3.5      | -75.1                    | 5.3      | -84.9                    | 5.6      | -93.3                    | 6.2      | -98.9                    | 6.8      | -102.0                   | 7.1      |
| 3ZK6 | -0.1                   | -40.3                    | 3.4      | -41.1                    | 5.9      | -46.1                    | 6.9      | -56.4                    | 7.6      | -66.0                    | 7.0      | -73.7                    | 6.6      |
| 3ZLN | -1.6                   | -45.2                    | 2.7      | -60.8                    | 5.1      | -70.3                    | 5.6      | -77.0                    | 6.2      | -80.4                    | 6.7      | -82.0                    | 6.9      |
| 3ZLO | -2.8                   | -60.4                    | 3.4      | -73.9                    | 4.5      | -82.9                    | 5.1      | -91.2                    | 5.7      | -96.9                    | 5.7      | -99.7                    | 5.9      |
| 3ZLR | -3.0                   | -60.0                    | 3.6      | -86.7                    | 5.6      | -97.3                    | 5.9      | -108.9                   | 7.1      | -117.5                   | 8.0      | -122.6                   | 8.3      |

Table S40. Correlation values between experimental data and predicted binding energies obtained for the penicillopepsin system.

| GPU, 1 ns | RUN 1 | RUN 2 | RUN 3 |      |         | HPC, 1 ns | RUN 1 | RUN 2 | RUN 3 |      |         |
|-----------|-------|-------|-------|------|---------|-----------|-------|-------|-------|------|---------|
| NWAT      | $r^2$ | $r^2$ | $r^2$ | Avg  | St. Dev |           | $r^2$ | $r^2$ | $r^2$ | Avg  | St. Dev |
| 0         | 0.38  | 0.31  | 0.17  | 0.29 | 0.11    |           | 0.18  | 0.50  | 0.15  | 0.28 | 0.19    |
| 10        | 0.8   | 0.71  | 0.77  | 0.76 | 0.05    |           | 0.57  | 0.93  | 0.67  | 0.72 | 0.19    |
| 20        | 0.8   | 0.71  | 0.81  | 0.77 | 0.06    |           | 0.61  | 0.91  | 0.72  | 0.75 | 0.15    |
| 30        | 0.79  | 0.72  | 0.83  | 0.78 | 0.06    |           | 0.69  | 0.91  | 0.76  | 0.79 | 0.11    |
| 40        | 0.78  | 0.73  | 0.82  | 0.78 | 0.05    |           | 0.76  | 0.91  | 0.76  | 0.81 | 0.09    |
| 50        | 0.76  | 0.74  | 0.79  | 0.76 | 0.03    |           | 0.82  | 0.87  | 0.75  | 0.81 | 0.06    |
| GPU, 4 ns |       |       |       |      |         | HPC, 4 ns |       |       |       |      |         |
| 0         | 0.13  | 0.17  | 0.06  | 0.12 | 0.06    |           | 0.23  | 0.00  | 0.00  | 0.08 | 0.13    |
| 10        | 0.83  | 0.82  | 0.70  | 0.78 | 0.07    |           | 0.59  | 0.85  | 0.89  | 0.78 | 0.16    |
| 20        | 0.73  | 0.78  | 0.80  | 0.77 | 0.04    |           | 0.59  | 0.86  | 0.89  | 0.78 | 0.17    |
| 30        | 0.68  | 0.73  | 0.77  | 0.73 | 0.05    |           | 0.61  | 0.84  | 0.86  | 0.77 | 0.14    |
| 40        | 0.70  | 0.67  | 0.75  | 0.71 | 0.04    |           | 0.64  | 0.84  | 0.81  | 0.76 | 0.11    |
| 50        | 0.73  | 0.61  | 0.72  | 0.69 | 0.07    |           | 0.68  | 0.84  | 0.74  | 0.75 | 0.08    |

Table S41. Correlation values between experimental data and predicted binding energies obtained for the HIV1-protease system.

| GPU, 1 ns | RUN 1 | RUN 2 | RUN 3 |      |         | HPC, 1 ns | RUN 1 | RUN 2 | RUN 3 |      |         |
|-----------|-------|-------|-------|------|---------|-----------|-------|-------|-------|------|---------|
| NWAT      | $r^2$ | $r^2$ | $r^2$ | Avg  | St. Dev |           | $r^2$ | $r^2$ | $r^2$ | Avg  | St. Dev |
| 0         | 0.22  | 0.06  | 0.03  | 0.10 | 0.10    |           | 0.17  | 0.07  | 0.03  | 0.09 | 0.07    |
| 10        | 0.08  | 0.03  | 0.12  | 0.08 | 0.05    |           | 0.04  | 0.01  | 0.12  | 0.06 | 0.06    |
| 20        | 0.13  | 0.09  | 0.12  | 0.11 | 0.02    |           | 0.15  | 0.05  | 0.13  | 0.11 | 0.05    |
| 30        | 0.52  | 0.60  | 0.68  | 0.60 | 0.08    |           | 0.51  | 0.36  | 0.61  | 0.49 | 0.13    |
| 40        | 0.60  | 0.77  | 0.74  | 0.70 | 0.09    |           | 0.58  | 0.64  | 0.71  | 0.64 | 0.07    |
| 50        | 0.62  | 0.80  | 0.74  | 0.72 | 0.09    |           | 0.59  | 0.72  | 0.72  | 0.68 | 0.08    |
| 60        | 0.66  | 0.80  | 0.74  | 0.73 | 0.07    |           | 0.60  | 0.73  | 0.72  | 0.68 | 0.07    |
| 70        | 0.64  | 0.80  | 0.74  | 0.73 | 0.08    |           | 0.60  | 0.73  | 0.72  | 0.68 | 0.07    |
| GPU, 4 ns |       |       |       |      |         | HPC, 4 ns |       |       |       |      |         |
| 0         | 0.12  | -0.02 | 0.00  | 0.03 | 0.08    |           | 0.34  | 0.01  | 0.01  | 0.12 | 0.19    |
| 10        | 0.13  | 0.00  | 0.03  | 0.05 | 0.07    |           | 0.37  | 0.19  | 0.07  | 0.21 | 0.15    |
| 20        | 0.19  | 0.01  | 0.02  | 0.07 | 0.10    |           | 0.4   | 0.06  | 0.01  | 0.16 | 0.21    |
| 30        | 0.53  | 0.24  | 0.23  | 0.33 | 0.17    |           | 0.8   | 0.32  | 0.13  | 0.42 | 0.35    |
| 40        | 0.65  | 0.50  | 0.40  | 0.52 | 0.13    |           | 0.77  | 0.52  | 0.36  | 0.55 | 0.21    |
| 50        | 0.67  | 0.58  | 0.45  | 0.57 | 0.11    |           | 0.76  | 0.57  | 0.45  | 0.59 | 0.16    |
| 60        | 0.66  | 0.60  | 0.47  | 0.58 | 0.10    |           | 0.77  | 0.58  | 0.48  | 0.61 | 0.15    |
| 70        | 0.64  | 0.62  | 0.48  | 0.58 | 0.09    |           | 0.79  | 0.58  | 0.51  | 0.63 | 0.15    |

Table S42. Correlation values between experimental data and predicted binding energies obtained for the BCL-X<sub>L</sub> system.

| GPU, 1 ns | RUN 1 | RUN 2 | RUN 3 |      |         | HPC, 1 ns | RUN 1 | RUN 2 | RUN 3 |      |         |
|-----------|-------|-------|-------|------|---------|-----------|-------|-------|-------|------|---------|
| NWAT      | $r^2$ | $r^2$ | $r^2$ | Avg  | St. Dev |           | $r^2$ | $r^2$ | $r^2$ | Avg  | St. Dev |
| 0         | 0.75  | 0.73  | 0.79  | 0.76 | 0.03    |           | 0.7   | 0.75  | 0.74  | 0.73 | 0.03    |
| 10        | 0.71  | 0.69  | 0.72  | 0.71 | 0.02    |           | 0.75  | 0.72  | 0.65  | 0.71 | 0.05    |
| 20        | 0.67  | 0.68  | 0.69  | 0.68 | 0.01    |           | 0.74  | 0.69  | 0.62  | 0.68 | 0.06    |
| 30        | 0.67  | 0.71  | 0.69  | 0.69 | 0.02    |           | 0.73  | 0.71  | 0.62  | 0.69 | 0.06    |
| 40        | 0.68  | 0.71  | 0.69  | 0.69 | 0.02    |           | 0.69  | 0.7   | 0.61  | 0.67 | 0.05    |
| 50        | 0.69  | 0.69  | 0.69  | 0.69 | 0.00    |           | 0.65  | 0.68  | 0.58  | 0.64 | 0.05    |
| GPU, 4 ns |       |       |       |      |         | HPC, 4 ns |       |       |       |      |         |
| 0         | 0.63  | 0.76  | 0.75  | 0.71 | 0.07    |           | 0.64  | 0.7   | 0.76  | 0.67 | 0.04    |
| 10        | 0.65  | 0.75  | 0.74  | 0.71 | 0.06    |           | 0.75  | 0.7   | 0.65  | 0.73 | 0.04    |
| 20        | 0.65  | 0.74  | 0.72  | 0.70 | 0.05    |           | 0.73  | 0.66  | 0.64  | 0.70 | 0.05    |
| 30        | 0.65  | 0.73  | 0.71  | 0.70 | 0.04    |           | 0.74  | 0.66  | 0.65  | 0.70 | 0.06    |
| 40        | 0.66  | 0.71  | 0.71  | 0.69 | 0.03    |           | 0.73  | 0.66  | 0.66  | 0.70 | 0.05    |
| 50        | 0.65  | 0.68  | 0.71  | 0.68 | 0.03    |           | 0.69  | 0.63  | 0.66  | 0.66 | 0.04    |

Table S43. Two-tailed t test ( $p < 0.05$ ) between the  $r^2$  values for Nwat = 0 ( $r_{avg,0}^2$ ) and for each Nwat ( $r_{avg,x}^2$ ) at any simulation condition and for all the systems (Ho: the two average  $r^2$  are not significantly different).

| <b>Penicillopepsin</b>                       |               |        |                   |                                              |        |                   |  |
|----------------------------------------------|---------------|--------|-------------------|----------------------------------------------|--------|-------------------|--|
| GPU 1 ns                                     |               |        |                   | HPC 1 ns                                     |        |                   |  |
| Nwat = 0 $r_{avg,0}^2 = 0.29$ , Var = 0.0114 |               |        |                   | Nwat = 0 $r_{avg,0}^2 = 0.28$ , Var = 0.0376 |        |                   |  |
| Nwat                                         | $r_{avg,x}^2$ | Varx   | P(T<=t) two tails | $r_{avg,x}^2$                                | Varx   | P(T<=t) two tails |  |
| 10                                           | 0.76          | 0.0021 | 0.0059            | 0.72                                         | 0.0345 | 0.0450            |  |
| 20                                           | 0.77          | 0.003  | 0.0060            | 0.75                                         | 0.023  | 0.0298            |  |
| 30                                           | 0.78          | 0.0031 | 0.0058            | 0.79                                         | 0.0126 | 0.0291            |  |
| 40                                           | 0.78          | 0.002  | 0.0053            | 0.81                                         | 0.0075 | 0.0225            |  |
| 50                                           | 0.76          | 0.0006 | 0.0172            | 0.81                                         | 0.0036 | 0.0446            |  |
| GPU 4 ns                                     |               |        |                   | HPC 4 ns                                     |        |                   |  |
| Nwat = 0 $r_{avg,0}^2 = 0.12$ , Var = 0.0031 |               |        |                   | Nwat = 0 $r_{avg,0}^2 = 0.08$ , Var = 0.0176 |        |                   |  |
| Nwat                                         | $r_{avg,x}^2$ | Varx   | P(T<=t) two tails | $r_{avg,x}^2$                                | Varx   | P(T<=t) two tails |  |
| 10                                           | 0.78          | 0.0052 | 0.0002            | 0.78                                         | 0.0265 | 0.0045            |  |
| 20                                           | 0.77          | 0.0013 | 0.0004            | 0.78                                         | 0.0273 | 0.0045            |  |
| 30                                           | 0.73          | 0.002  | 0.0001            | 0.77                                         | 0.0193 | 0.0033            |  |
| 40                                           | 0.71          | 0.0016 | 0.0001            | 0.76                                         | 0.0116 | 0.0022            |  |
| 50                                           | 0.69          | 0.0044 | 0.0003            | 0.75                                         | 0.0065 | 0.0048            |  |
| <b>HIV1-Protease</b>                         |               |        |                   |                                              |        |                   |  |
| GPU 1 ns                                     |               |        |                   | HPC 1 ns                                     |        |                   |  |
| Nwat = 0 $r_{avg,0}^2 = 0.10$ , Var = 0.0104 |               |        |                   | Nwat = 0 $r_{avg,0}^2 = 0.09$ , Var = 0.0052 |        |                   |  |
| Nwat                                         | $r_{avg,x}^2$ | Varx   | P(T<=t) two tails | $r_{avg,x}^2$                                | Varx   | P(T<=t) two tails |  |
| 10                                           | 0.08          | 0.002  | 0.7069            | 0.06                                         | 0.0032 | 0.5637            |  |
| 20                                           | 0.11          | 0.0004 | 0.8833            | 0.11                                         | 0.0028 | 0.7182            |  |
| 30                                           | 0.60          | 0.0064 | 0.0027            | 0.49                                         | 0.0158 | 0.0170            |  |
| 40                                           | 0.7           | 0.0082 | 0.0016            | 0.64                                         | 0.0042 | 0.0006            |  |
| 50                                           | 0.72          | 0.0084 | 0.0015            | 0.68                                         | 0.0056 | 0.0006            |  |
| 60                                           | 0.73          | 0.0049 | 0.0009            | 0.68                                         | 0.0052 | 0.0005            |  |
| GPU 4 ns                                     |               |        |                   | HPC 4 ns                                     |        |                   |  |
| Nwat = 0 $r_{avg,0}^2 = 0.03$ , Var = 0.0057 |               |        |                   | Nwat = 0 $r_{avg,0}^2 = 0.12$ , Var = 0.0363 |        |                   |  |
| Nwat                                         | $r_{avg,x}^2$ | Varx   | P(T<=t) two tails | $r_{avg,x}^2$                                | Varx   | P(T<=t) two tails |  |
| 10                                           | 0.05          | 0.0046 | 0.7508            | 0.21                                         | 0.0228 | 0.5563            |  |
| 20                                           | 0.07          | 0.0102 | 0.6126            | 0.16                                         | 0.045  | 0.8347            |  |
| 30                                           | 0.33          | 0.029  | 0.0686            | 0.42                                         | 0.1192 | 0.2836            |  |
| 40                                           | 0.52          | 0.0158 | 0.0107            | 0.55                                         | 0.0427 | 0.0570            |  |
| 50                                           | 0.57          | 0.0122 | 0.0023            | 0.59                                         | 0.0244 | 0.0292            |  |
| 60                                           | 0.58          | 0.0094 | 0.0016            | 0.61                                         | 0.0217 | 0.0244            |  |



| <b>BCL-X<sub>L</sub></b>                     |               |        |                   |                                              |        |                   |
|----------------------------------------------|---------------|--------|-------------------|----------------------------------------------|--------|-------------------|
| GPU 1 ns                                     |               |        |                   | HPC 1 ns                                     |        |                   |
| Nwat = 0 $r_{avg,0}^2 = 0.76$ , Var = 0.0009 |               |        |                   | Nwat = 0 $r_{avg,0}^2 = 0.73$ , Var = 0.0007 |        |                   |
| Nwat                                         | $r_{avg,x}^2$ | Varx   | P(T<=t) two tails | $r_{avg,x}^2$                                | Varx   | P(T<=t) two tails |
| 10                                           | 0.71          | 0.0002 | 0.0850            | 0.71                                         | 0.0026 | 0.5343            |
| 20                                           | 0.68          | 0.0001 | 0.0539            | 0.68                                         | 0.0036 | 0.3070            |
| 30                                           | 0.69          | 0.0004 | 0.0508            | 0.69                                         | 0.0034 | 0.3274            |
| 40                                           | 0.69          | 0.0002 | 0.0489            | 0.67                                         | 0.0024 | 0.1449            |
| 50                                           | 0.69          | 0.0000 | 0.0634            | 0.64                                         | 0.0026 | 0.0678            |
| GPU 4 ns                                     |               |        |                   | HPC 4 ns                                     |        |                   |
| Nwat = 0 $r_{avg,0}^2 = 0.71$ , Var = 0.0052 |               |        |                   | Nwat = 0 $r_{avg,0}^2 = 0.70$ , Var = 0.0036 |        |                   |
| Nwat                                         | $r_{avg,x}^2$ | Varx   | P(T<=t) two tails | $r_{avg,x}^2$                                | Varx   | P(T<=t) two tails |
| 10                                           | 0.71          | 0.0030 | 1.0000            | 0.70                                         | 0.0025 | 1.0000            |
| 20                                           | 0.70          | 0.0022 | 0.8540            | 0.68                                         | 0.0022 | 0.6247            |
| 30                                           | 0.70          | 0.0017 | 0.7523            | 0.68                                         | 0.0024 | 0.7290            |
| 40                                           | 0.69          | 0.0008 | 0.6866            | 0.68                                         | 0.0016 | 0.7102            |
| 50                                           | 0.68          | 0.0009 | 0.5144            | 0.66                                         | 0.0009 | 0.3777            |

Table S44. Water-mediated H-bonds with occupancy &gt; 20% detected from the analysis of a CPU MD simulation of 3NUO. Water-mediated H-bonds involving amprenavir are reported in bold.

| Nwat = 10              |             | Nwat = 70              |             |
|------------------------|-------------|------------------------|-------------|
| Residues involved      | occ%        | Residues involved      | occ%        |
| <b>31:ASP 203:AMP</b>  | <b>58.0</b> | <b>31:ASP 203:AMP</b>  | <b>58.0</b> |
| 90:LEU 91:MET          | 54.0        | 129:GLY 131:ASP        | 56.0        |
| 129:GLY 131:ASP        | 51.0        | 90:LEU 91:MET          | 54.0        |
| <b>132:ASP 203:AMP</b> | <b>47.0</b> | 80:PRO 152:ILE         | 54.0        |
| 191:LEU 192:MET        | 41.0        | <b>132:ASP 203:AMP</b> | <b>47.0</b> |
|                        |             | 191:LEU 192:MET        | 41.0        |
|                        |             | 27:THR 28:GLY          | 34.0        |
|                        |             | 52:GLY 181:PRO         | 30.0        |
|                        |             | 30:ASP 31:ASP          | 28.0        |
|                        |             | 31:ASP 46:LYS          | 21.0        |
|                        |             | 128:THR 129:GLY        | 20.0        |

Table S45. Water-mediated H-bonds with occupancy &gt; 20% detected from the analysis of a CPU MD simulation of 3NDW. The water-mediated H-bonds involving ritonavir are reported in bold.

| Nwat = 10              |             | Nwat = 70              |             |
|------------------------|-------------|------------------------|-------------|
| Residues involved      | occ%        | Residues involved      | occ%        |
| 191:LEU 192:LEU        | 73.0        | 26:ASP 127:ASP         | 86.0        |
| 26:ASP 127:ASP         | 70.0        | 191:LEU 192:LEU        | 73.0        |
| <b>132:ASP 203:RIT</b> | <b>54.0</b> | <b>132:ASP 203:RIT</b> | <b>54.0</b> |
| 90:LEU 91:LEU          | 53.0        | 90:LEU 91:LEU          | 53.0        |
| 176:THR 177:VAL        | 36.0        | 28:GLY 30:ASP          | 38.0        |
|                        |             | 176:THR 177:VAL        | 36.0        |

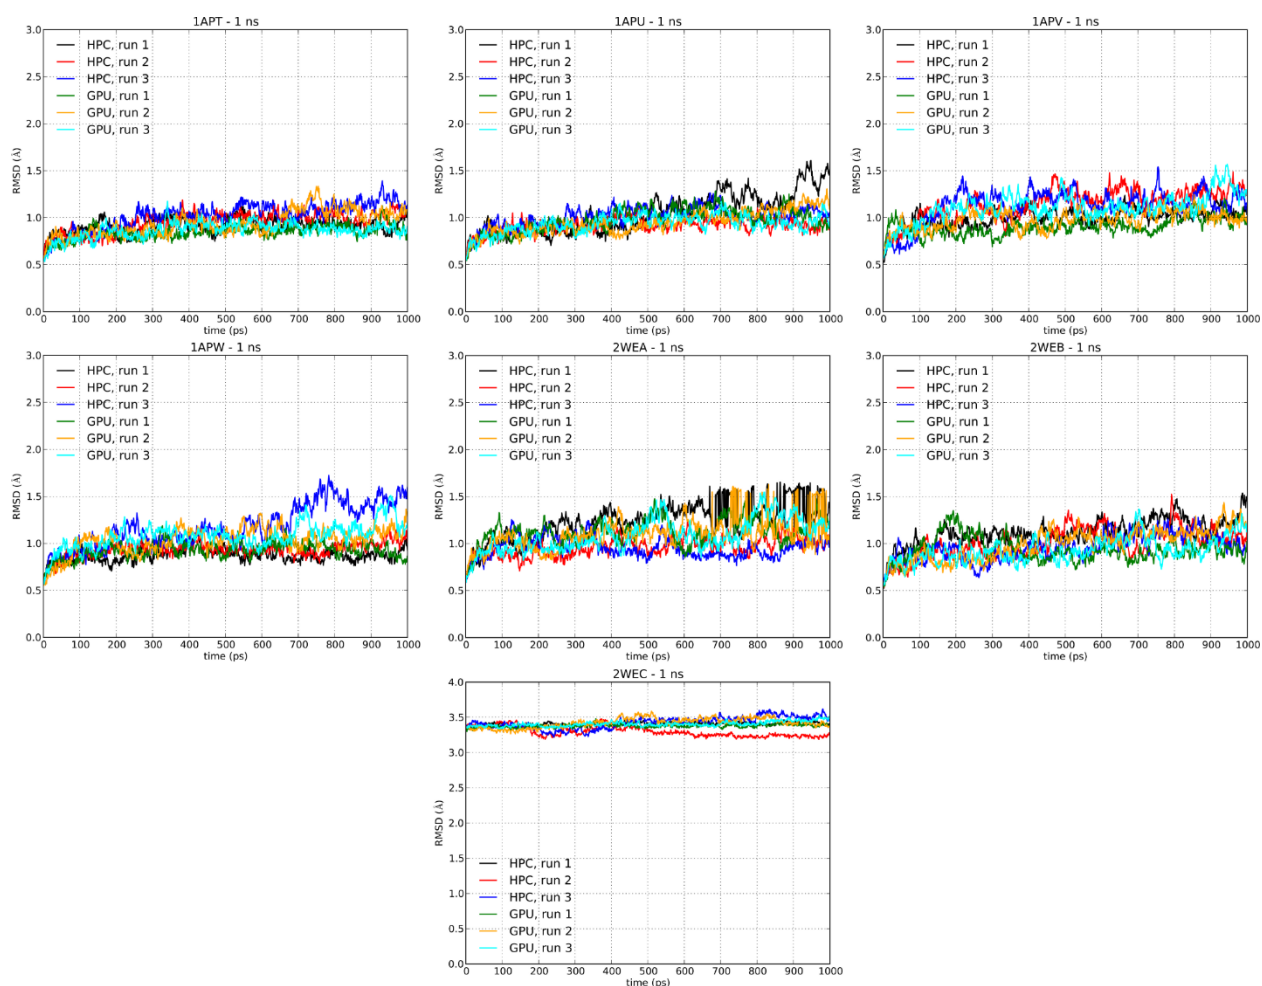

Figure S4. Comparison of RMSD values of the 1<sup>st</sup> ns of MD simulations of the penicillopepsin system obtained by using GPU or CPU hardware.

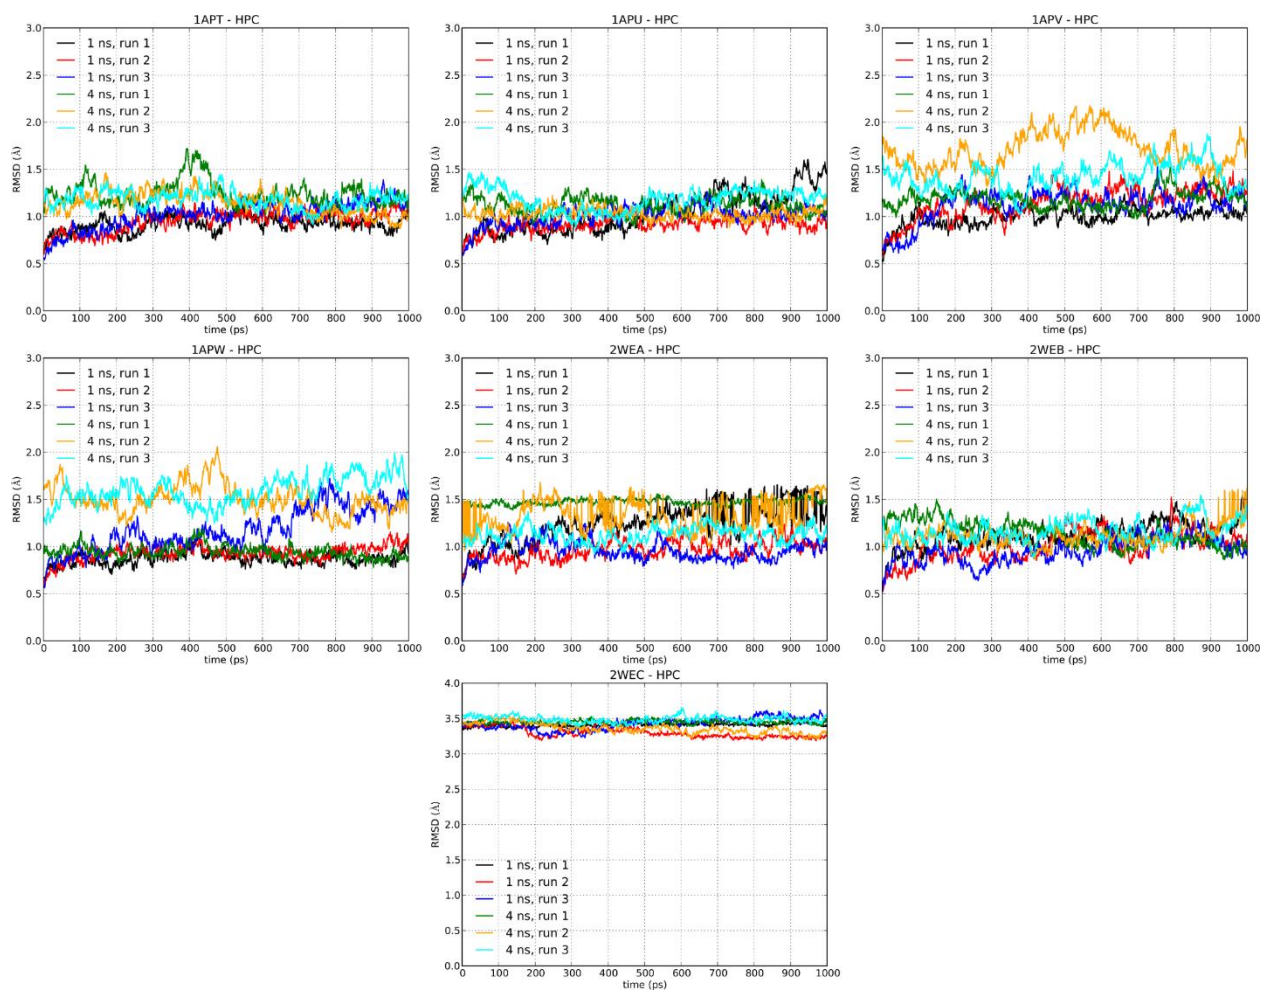

Figure S5. Comparison of RMSD values of the 1<sup>st</sup> ns and 4<sup>th</sup> of GPU MD simulations of the penicillopepsin system.

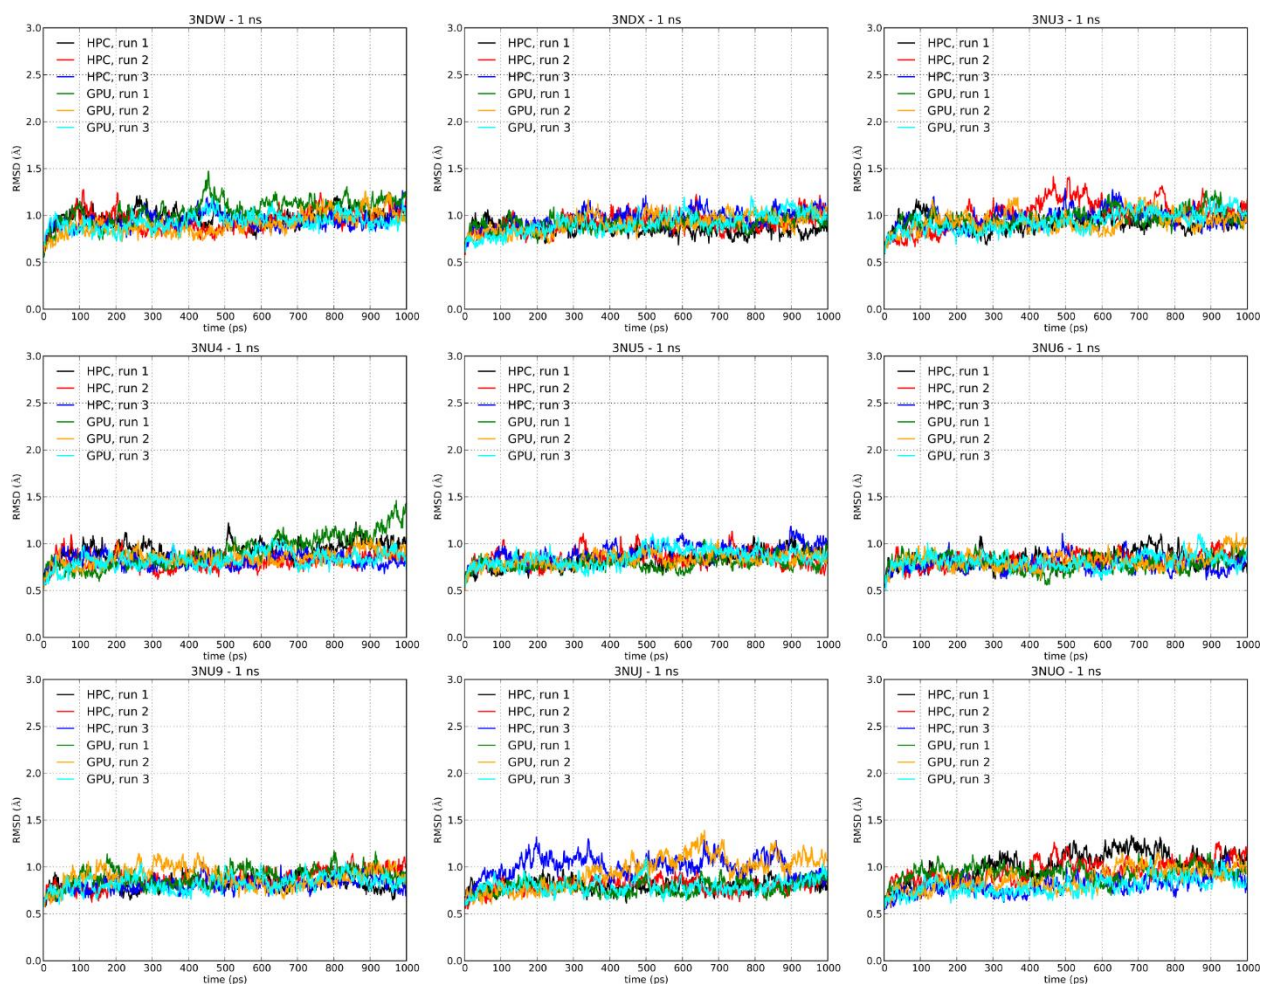

Figure S6. Comparison of RMSD values of the 1<sup>st</sup> ns of MD simulations of the HIV1-protease system obtained by using GPU or CPU hardware.

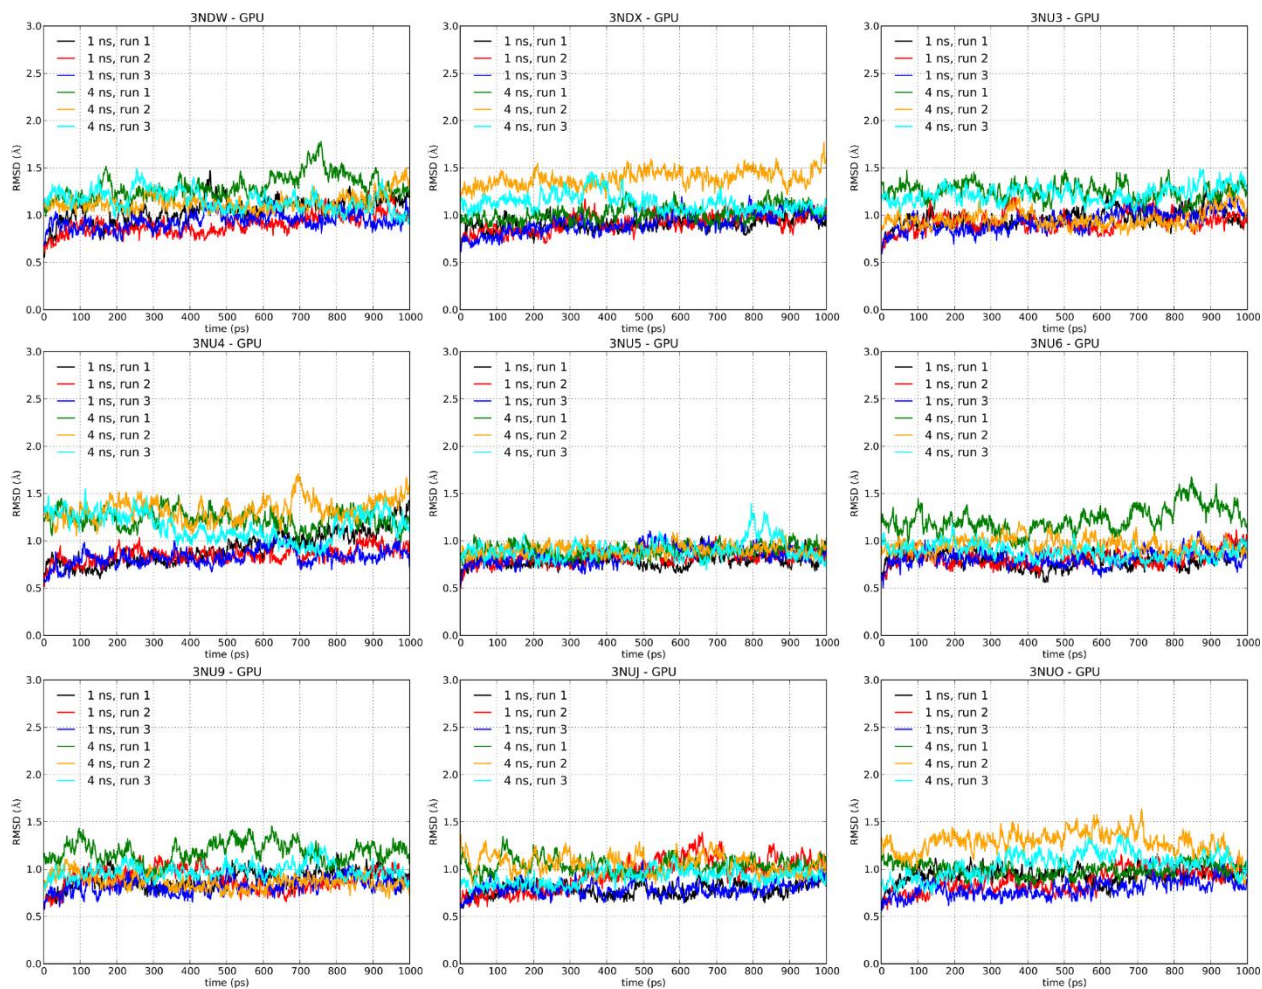

Figure S7. Comparison of RMSD values of the 1<sup>st</sup> ns and 4<sup>th</sup> of GPU MD simulations of the HIV1-protease system.



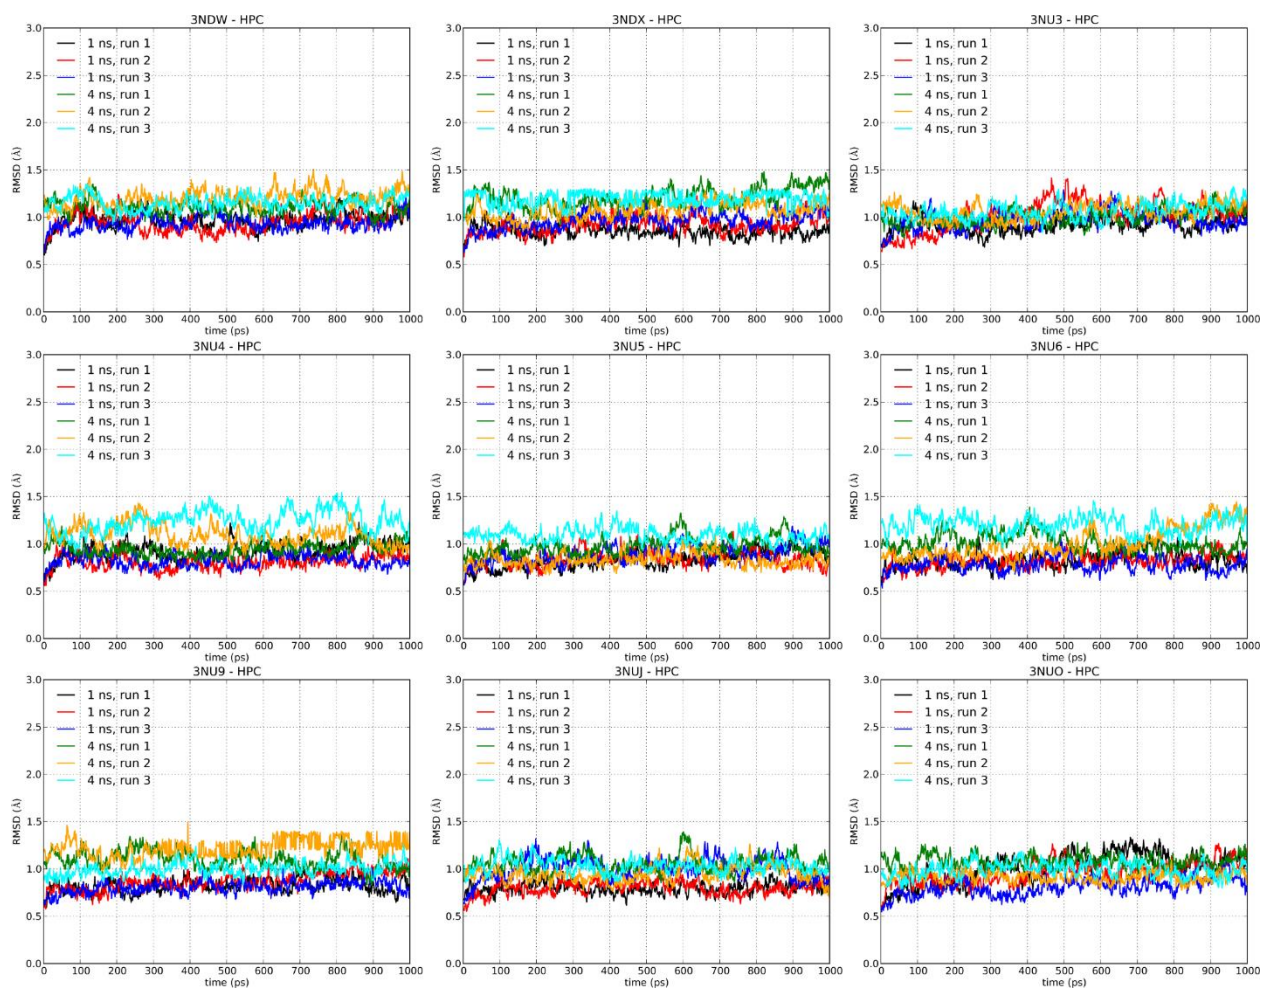

Figure S8. Comparison of RMSD values of the 1<sup>st</sup> ns and 4<sup>th</sup> of HPC MD simulations of the HIV1-protease system.

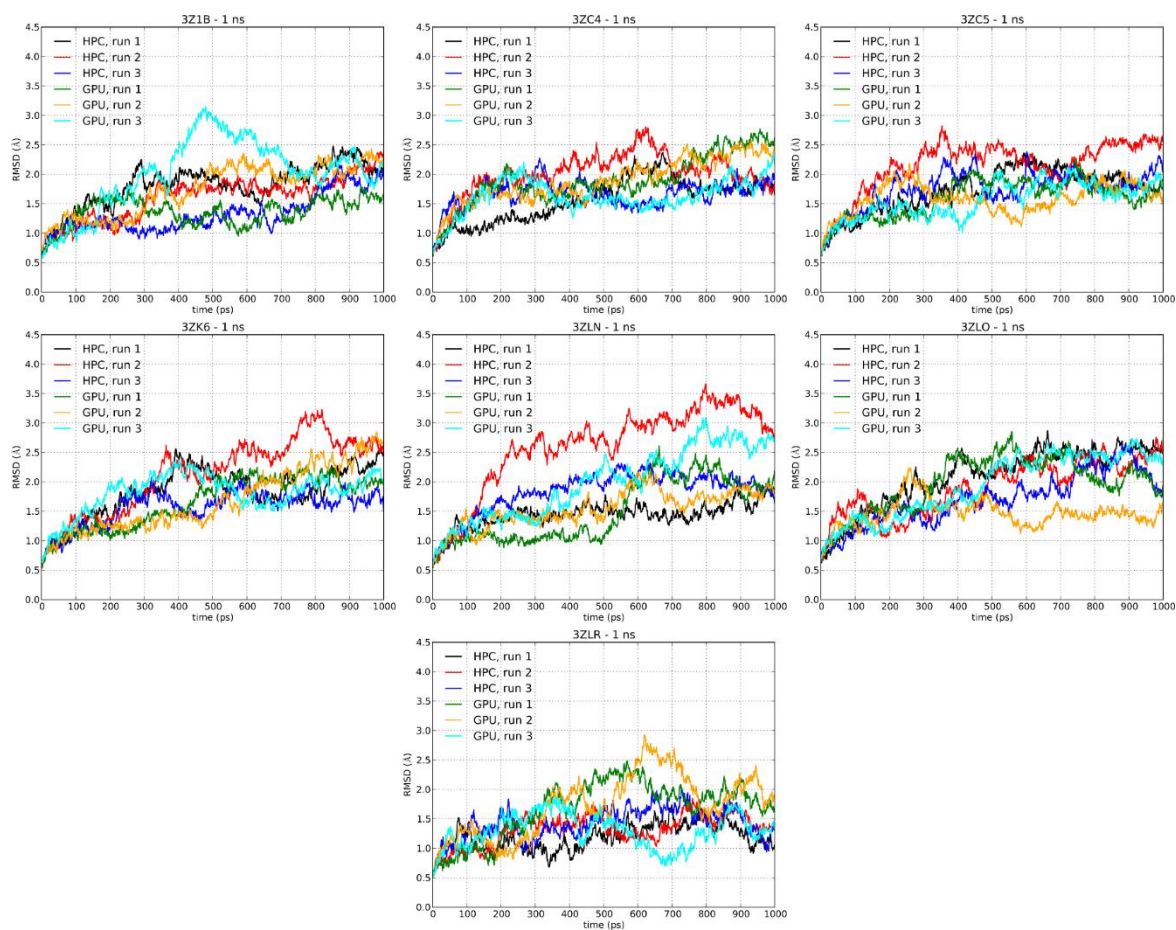

Figure S9. Comparison of RMSD values of the 1<sup>st</sup> ns of MD simulations of the Bcl-XL system obtained by using GPU or CPU hardware.



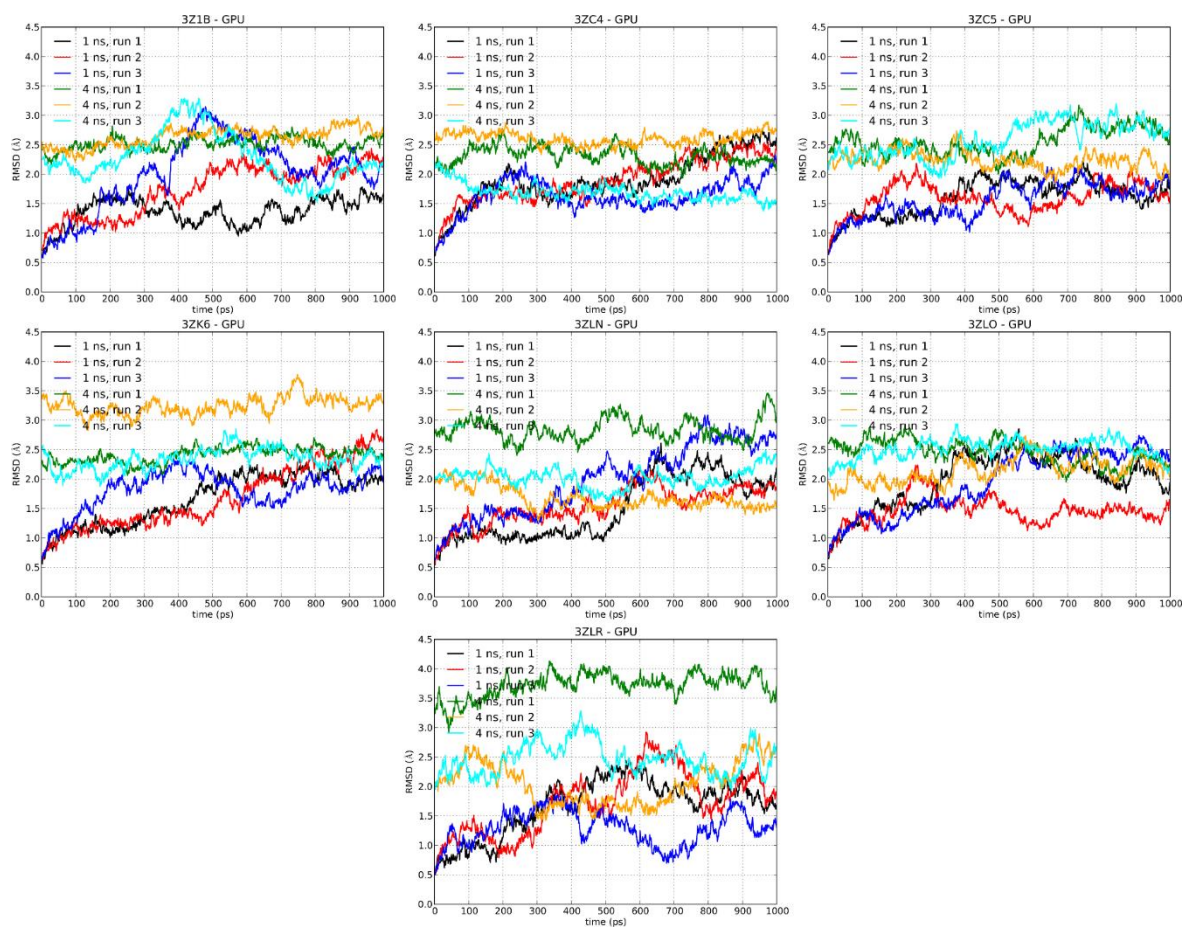

Figure S10. Comparison of RMSD values of the 1<sup>st</sup> ns and 4<sup>th</sup> of GPU MD simulations of the Bcl-XL system.

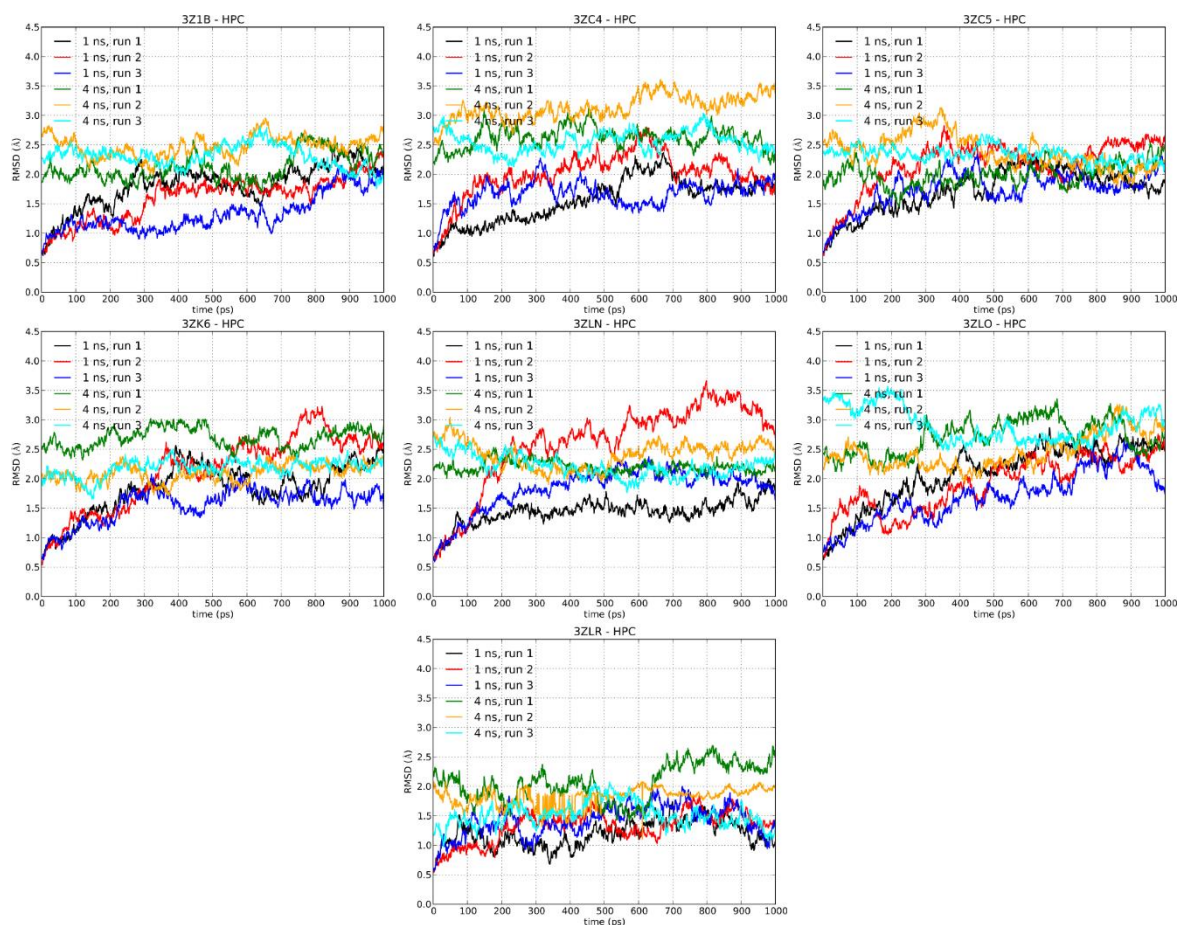

Figure S11. Comparison of RMSD values of the 1<sup>st</sup> ns and 4<sup>th</sup> of GPU MD simulations of the Bcl-X<sub>L</sub> system.

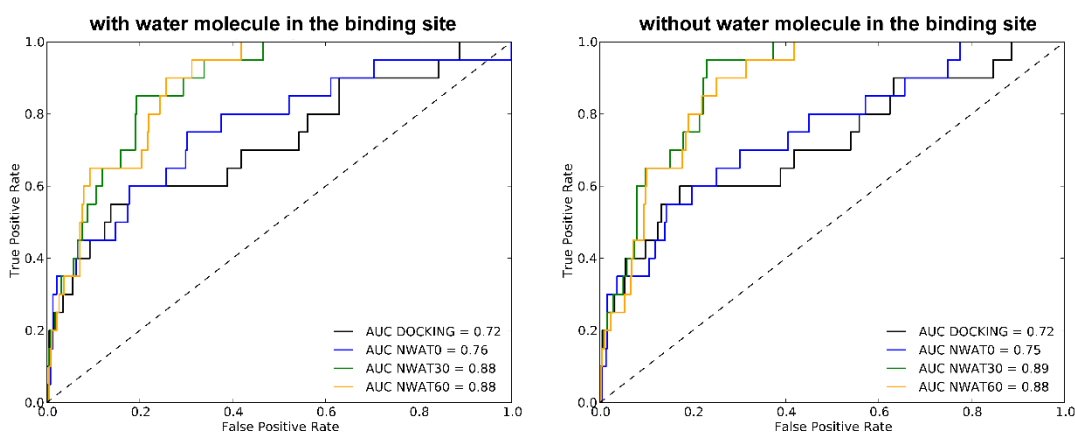

Figure S12. AUC of the ROC curves obtained from the docking experiments on AmpC by including (left) or not including (right) a water molecule in the binding site (x,y,z coordinates of the water oxygen: 77.0600, 4.2040, 24.8570)

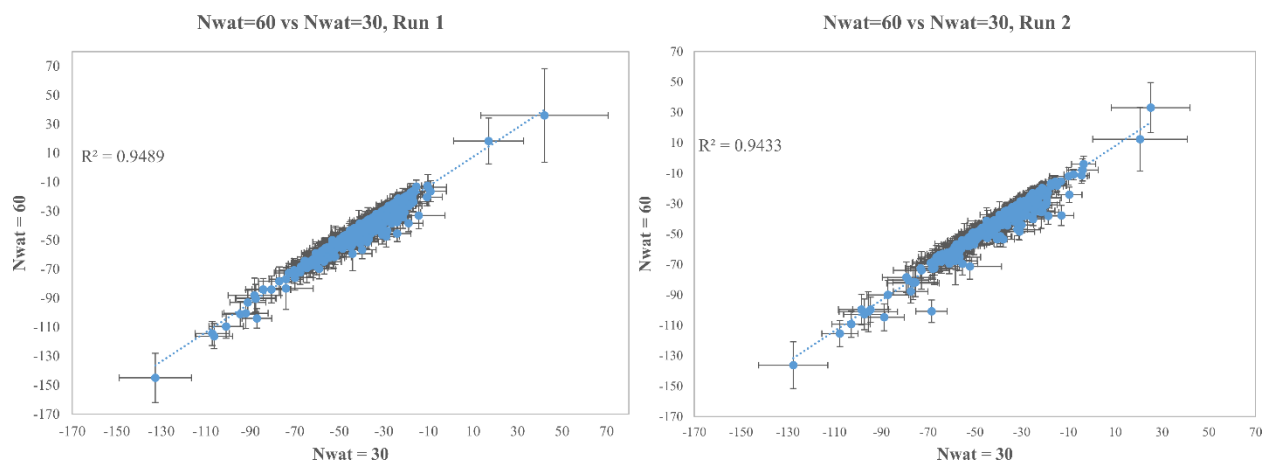

Figure S13. Ligand-to-ligand inter-method correlation between Nwat = 60 and 30 (results from two repetitions)

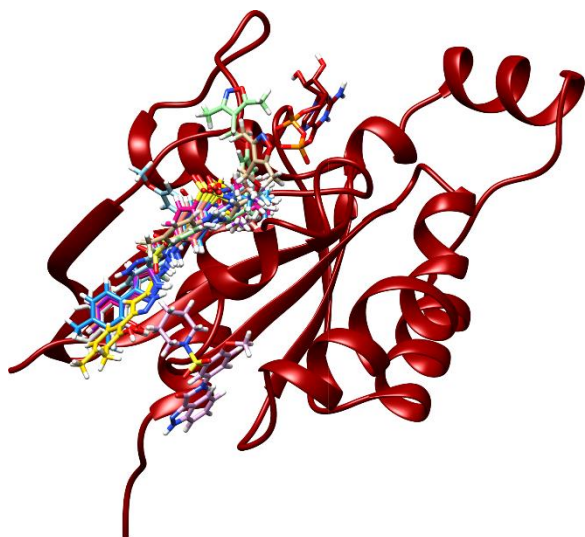

Figure S14. Docked poses of the active ligands from the docking.

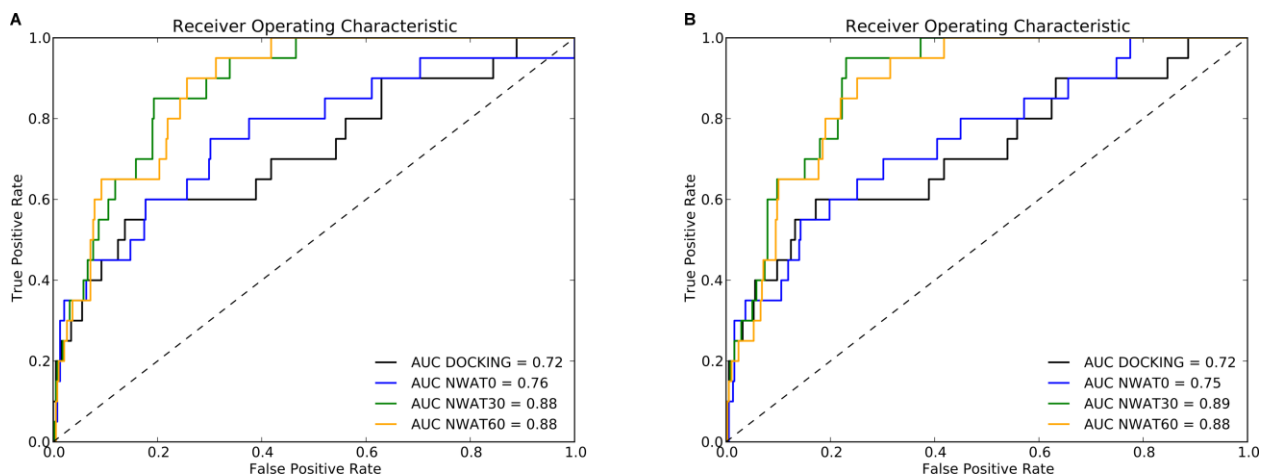

Figure S15. ROC AUCs obtained from the two repetitions of the AmpC VS

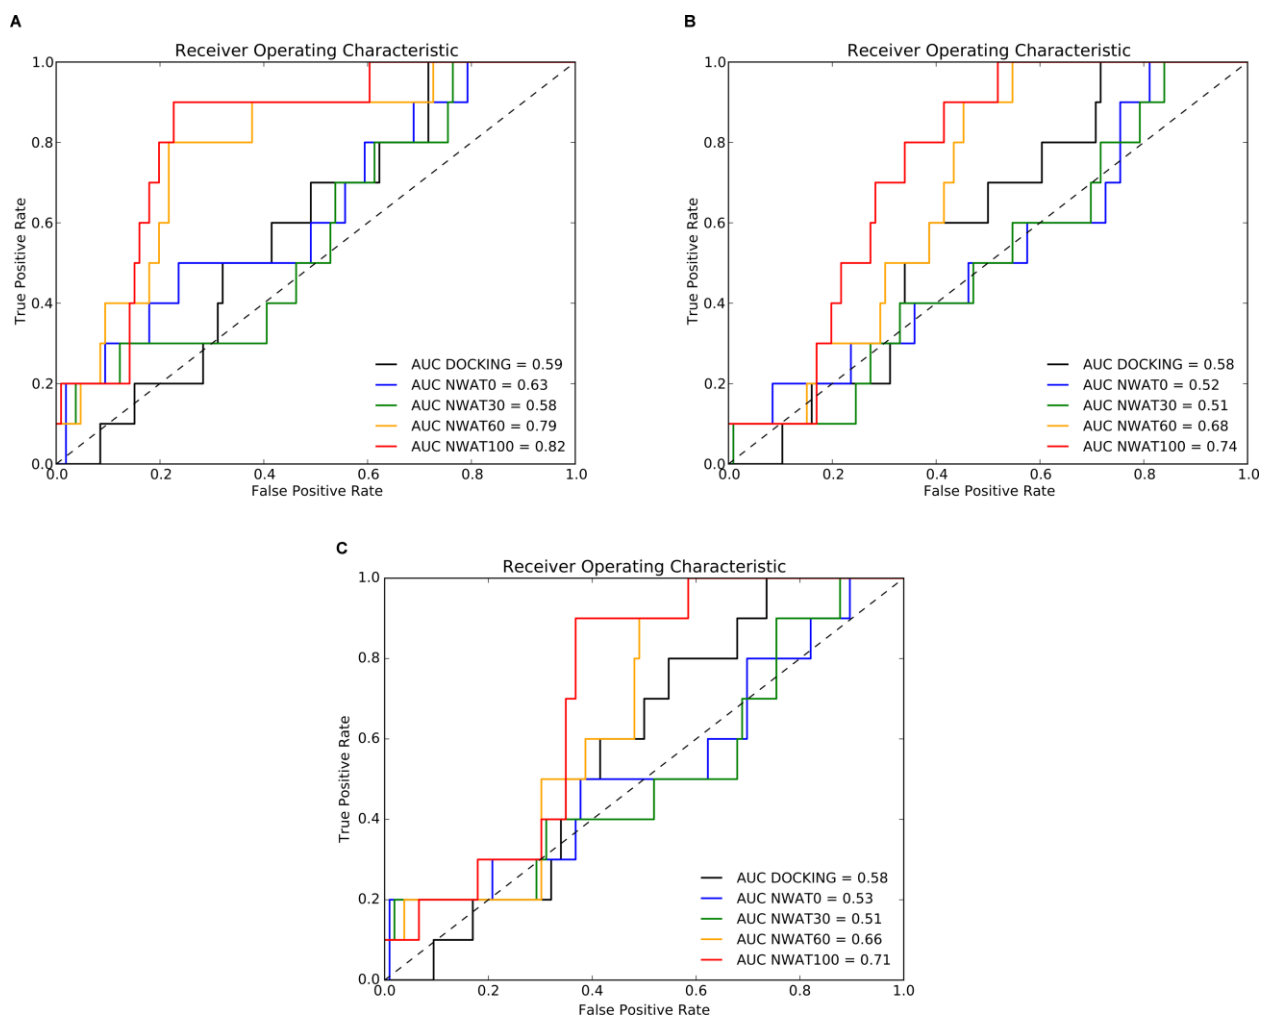

Figure S16. ROC AUCs obtained from the three repetitions of the Rac1 VS

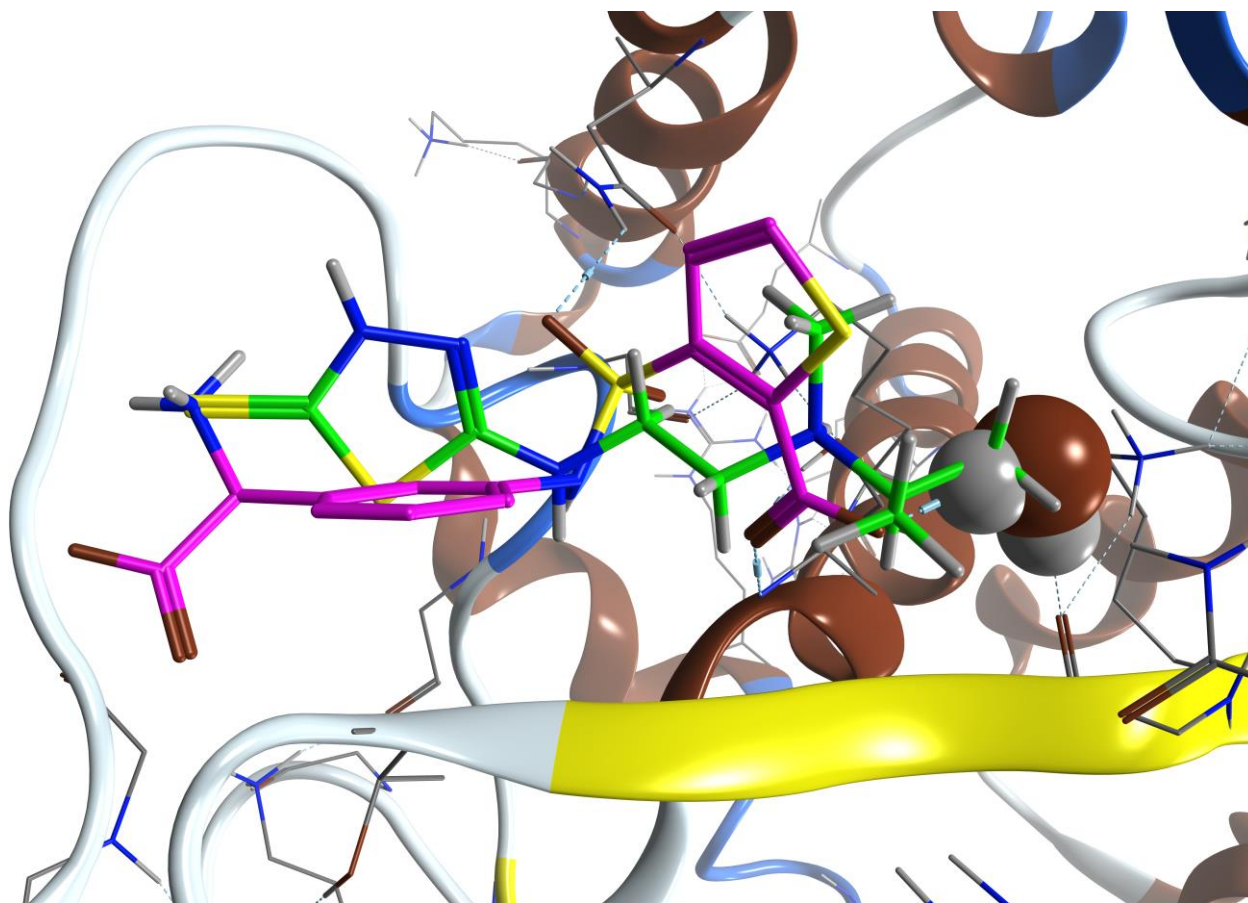

Figure S17. Predicted binding mode for the AmpC decoy 088 (green carbon atom). The crystallographic ligand (purple carbon atoms) is shown for comparison. It can be observed the overlap of the isopropyl moiety with the crystallographic water (represented as van der Waals spheres), which was not considered during docking.



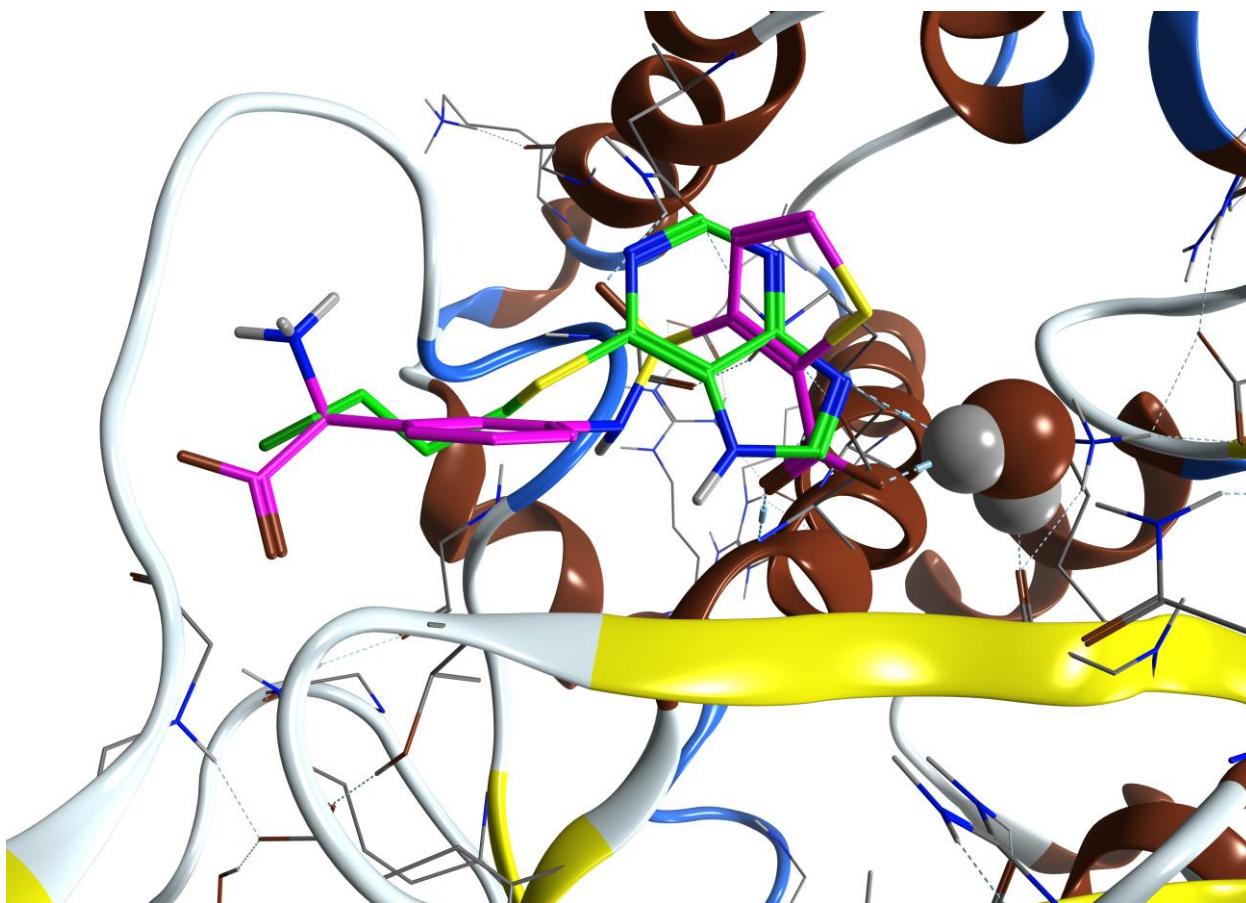

Figure S18. Predicted binding mode for the AmpC decoy 179 (green carbon atom). The crystallographic ligand (purple carbon atoms) is shown for comparison. It can be observed that the hydrophobic chloropropyl group is solvent-exposed and overlaps the hydrophilic amino acid moiety of the crystallographic ligand.

Table S46. AmpC VS docking scores and Nwat-MMGBSA relative binding energies (kcal/mol) computed with Nwat = 0, 30, 60 and 100 (first repetition).

| ligand    | docking score | Nwat=0     |         | Nwat=30    |         | Nwat=60    |         |
|-----------|---------------|------------|---------|------------|---------|------------|---------|
|           |               | $\Delta G$ | St.Dev. | $\Delta G$ | St.Dev. | $\Delta G$ | St.Dev. |
| ligand001 | -70.9203      | -21.0735   | 5.5033  | -73.9765   | 12.205  | -83.3602   | 14.4824 |
| ligand002 | -52.8023      | -12.375    | 2.2397  | -31.2734   | 4.9189  | -35.4741   | 5.663   |
| ligand003 | -63.568       | -32.9507   | 6.7406  | -58.9545   | 6.9509  | -58.7278   | 6.9506  |
| ligand004 | -49.2289      | -22.449    | 2.8558  | -87.5956   | 8.7532  | -90.0181   | 9.4846  |
| ligand005 | -60.7876      | -17.4622   | 2.123   | -28.9397   | 3.2136  | -29.5881   | 3.267   |
| ligand006 | -69.7475      | -27.5147   | 3.1351  | -36.7403   | 3.5492  | -35.728    | 3.491   |
| ligand007 | -67.2227      | -18.8992   | 3.1403  | -38.5383   | 5.0104  | -40.4554   | 4.8999  |
| ligand008 | -67.4324      | -30.7253   | 2.9143  | -27.9058   | 4.1606  | -26.4221   | 4.1018  |
| ligand009 | -71.5044      | -15.3561   | 1.9695  | -31.08     | 4.4463  | -35.4681   | 4.45    |
| ligand010 | -57.014       | -10.9602   | 3.1057  | -27.1359   | 4.203   | -30.7341   | 3.2705  |
| ligand011 | -51.615       | -13.1361   | 2.1058  | -29.7222   | 3.2385  | -30.4525   | 3.227   |
| ligand012 | -67.7158      | -12.2916   | 3.103   | -29.7997   | 4.6412  | -36.8853   | 4.5655  |
| ligand013 | -64.7458      | -17.529    | 2.6516  | -27.3412   | 4.5138  | -26.6888   | 4.5241  |
| ligand014 | -50.2738      | -22.7554   | 2.6469  | -25.3601   | 3.2633  | -25.4289   | 3.2718  |
| ligand015 | -64.5819      | -23.7584   | 3.7434  | -25.9093   | 3.9325  | -24.9329   | 4.0365  |
| ligand016 | -65.9854      | -7.2767    | 2.7361  | -22.7931   | 5.5771  | -27.7493   | 5.4688  |
| ligand017 | -54.4025      | -9.4167    | 1.7745  | -23.9684   | 3.3675  | -24.7922   | 3.7138  |
| ligand018 | -57.6642      | -15.7799   | 2.871   | -33.2218   | 4.2738  | -34.4181   | 4.2651  |
| ligand019 | -58.983       | -9.4859    | 2.4348  | -27.6443   | 5.3859  | -30.9142   | 5.5816  |
| ligand020 | -61.6109      | -22.865    | 2.8673  | -40.2357   | 4.466   | -40.2828   | 4.3537  |
| ligand021 | -59.0468      | -4.6855    | 2.5679  | -20.9018   | 3.6088  | -20.5938   | 3.9752  |
| ligand022 | -51.5421      | -11.8891   | 2.5466  | -23.5881   | 3.6645  | -21.2736   | 3.6331  |
| ligand023 | -56.6875      | -20.0218   | 2.7048  | -46.014    | 5.2183  | -49.6741   | 5.1036  |
| ligand024 | -72.1185      | -20.0802   | 3.8363  | -34.9917   | 4.8989  | -37.6168   | 4.5094  |
| ligand025 | -78.3615      | -12.4194   | 3.3628  | -37.5107   | 5.1049  | -51.4567   | 4.7963  |
| ligand026 | -59.9882      | -15.9739   | 2.5403  | -39.2298   | 5.7759  | -42.9314   | 4.5022  |
| ligand027 | -72.4351      | -4.8171    | 3.637   | -14.3679   | 11.7948 | -33.0381   | 9.1245  |
| ligand028 | -54.862       | -23.2832   | 2.9524  | -45.8982   | 5.0522  | -49.952    | 4.9607  |
| ligand029 | -48.2035      | -18.353    | 2.5698  | -42.9498   | 4.8859  | -51.2304   | 4.5306  |
| ligand030 | -67.4843      | -25.1185   | 5.1815  | -48.1643   | 5.074   | -54.902    | 4.5405  |
| ligand031 | -63.9661      | -24.8672   | 4.0515  | -44.7328   | 5.247   | -47.095    | 4.8027  |
| ligand032 | -9.74526      | -29.4188   | 2.7175  | -49.0585   | 4.5977  | -51.4505   | 4.6742  |
| ligand033 | -75.3706      | -14.3537   | 3.5264  | -45.0433   | 5.9569  | -54.7583   | 5.036   |
| ligand034 | -66.9673      | -20.3755   | 3.2328  | -32.5405   | 4.2994  | -35.2295   | 4.2464  |
| ligand035 | -73.0725      | -17.5083   | 3.3349  | -36.8003   | 4.848   | -39.5435   | 4.4498  |
| ligand036 | -65.9396      | -13.9793   | 1.7604  | -32.5657   | 3.9026  | -38.4198   | 3.8236  |

## Supplementary Material

|           |          |          |        |          |        |          |        |
|-----------|----------|----------|--------|----------|--------|----------|--------|
| ligand037 | -71.2235 | -25.9451 | 3.7584 | -39.3214 | 4.5241 | -39.0621 | 4.4072 |
| ligand038 | -54.8353 | -23.2906 | 2.8611 | -52.7159 | 5.2633 | -54.3741 | 5.1833 |
| ligand039 | -66.2268 | -18.5945 | 2.958  | -39.9195 | 5.202  | -42.2876 | 4.9119 |
| ligand040 | -57.2192 | -16.0264 | 3.2476 | -28.2016 | 5.3163 | -27.3897 | 5.2568 |
| ligand041 | -60.2821 | -26.0073 | 3.1028 | -60.1465 | 5.3906 | -68.2412 | 5.6036 |
| ligand042 | -60.8283 | -12.5355 | 2.5303 | -29.8003 | 4.619  | -37.9374 | 4.574  |
| ligand043 | -73.801  | -14.0976 | 2.3509 | -29.1319 | 3.332  | -30.6463 | 3.3511 |
| ligand044 | -65.5975 | -15.2943 | 2.2595 | -29.9154 | 4.7471 | -29.3211 | 4.8819 |
| ligand045 | -59.6756 | -7.3713  | 1.9576 | -29.9671 | 4.3738 | -35.4475 | 4.4937 |
| ligand046 | -55.7659 | -46.3456 | 6.6061 | -106.278 | 8.2894 | -116.306 | 8.6858 |
| ligand047 | -77.6478 | -20.4234 | 2.4314 | -39.2315 | 4.8008 | -48.6753 | 4.8651 |
| ligand048 | -77.2277 | -18.0223 | 2.6394 | -42.168  | 5.1165 | -50.811  | 5.0825 |
| ligand049 | -59.4425 | -18.5662 | 2.8289 | -25.5105 | 3.8533 | -25.1375 | 3.805  |
| ligand050 | -52.8139 | -16.4217 | 2.5244 | -40.7049 | 5.2331 | -52.3279 | 5.0677 |
| ligand051 | -65.4548 | -11.4596 | 3.6054 | -33.061  | 5.0224 | -35.4256 | 4.9348 |
| ligand052 | -61.9334 | -19.5464 | 4.9277 | -63.6376 | 6.8322 | -68.0125 | 7.2953 |
| ligand053 | -69.6871 | -8.0687  | 2.7326 | -32.6701 | 6.0743 | -40.1198 | 5.6983 |
| ligand054 | -78.755  | -6.9938  | 2.8893 | -21.5522 | 6.8552 | -21.2346 | 6.8973 |
| ligand055 | -62.0796 | -10.2501 | 2.3451 | -15.4514 | 3.9984 | -13.1324 | 4.4805 |
| ligand056 | -73.3657 | -17.8671 | 2.2832 | -40.9126 | 4.2799 | -45.4594 | 4.2709 |
| ligand057 | -70.3457 | -15.9653 | 3.3658 | -46.8692 | 6.3845 | -52.3935 | 6.2574 |
| ligand058 | -58.1784 | -14.4774 | 2.6453 | -42.3169 | 4.7945 | -47.6861 | 4.9545 |
| ligand059 | -68.9453 | -12.4072 | 3.278  | -35.683  | 5.3413 | -45.4066 | 4.6576 |
| ligand060 | -74.734  | -19.8165 | 3.9091 | -37.9296 | 3.8249 | -37.5902 | 3.6733 |
| ligand061 | -46.3304 | -22.7893 | 2.7028 | -49.9102 | 4.5932 | -52.4504 | 4.5764 |
| ligand062 | -61.3104 | -23.5547 | 2.7334 | -47.0516 | 4.8787 | -51.4707 | 4.9866 |
| ligand063 | -71.8557 | -14.0208 | 3.2802 | -49.9198 | 4.4889 | -53.1265 | 4.7542 |
| ligand064 | -49.7108 | -25.6904 | 3.2098 | -51.9015 | 4.8915 | -61.2757 | 5.78   |
| ligand065 | -59.1384 | -23.1455 | 3.2497 | -38.6627 | 3.6848 | -37.9428 | 3.7937 |
| ligand066 | -71.0738 | -11.586  | 2.093  | -34.0717 | 4.1546 | -40.6308 | 4.4732 |
| ligand067 | -59.3108 | -2.9908  | 1.5844 | -28.4515 | 5.7364 | -43.6943 | 5.9859 |
| ligand068 | -60.1386 | -4.9624  | 2.5713 | -31.3656 | 5.4993 | -41.8748 | 5.5793 |
| ligand069 | -67.6578 | -11.7313 | 2.3963 | -41.2125 | 4.4789 | -44.6231 | 4.6179 |
| ligand070 | -60.7614 | -1.099   | 1.9277 | -30.379  | 7.6567 | -38.983  | 8.9225 |
| ligand071 | -57.6567 | -15.9739 | 2.5637 | -37.1659 | 4.4555 | -38.3495 | 4.3777 |
| ligand072 | -58.1254 | -7.7042  | 2.1721 | -25.2246 | 4.7828 | -32.8611 | 4.5641 |
| ligand073 | -70.6129 | -18.8172 | 2.3426 | -42.7502 | 3.7301 | -44.9805 | 3.8484 |
| ligand074 | -62.1623 | -26.149  | 3.3925 | -42.7368 | 4.1161 | -44.4549 | 3.8918 |
| ligand075 | -66.7052 | -19.3367 | 2.341  | -30.9406 | 5.7488 | -35.3699 | 5.6373 |
| ligand076 | -73.3438 | -26.8377 | 4.2482 | -53.1254 | 6.1719 | -54.1088 | 6.1574 |



## Supplementary Material

|           |          |          |         |          |         |          |         |
|-----------|----------|----------|---------|----------|---------|----------|---------|
| ligand077 | -72.1592 | -5.8906  | 2.0057  | -33.1036 | 4.0987  | -35.825  | 4.3062  |
| ligand078 | -71.3268 | -18.4647 | 2.3534  | -46.41   | 5.6823  | -48.7022 | 6.0268  |
| ligand079 | -74.7591 | -17.9632 | 3.1572  | -35.5418 | 5.1808  | -43.4968 | 4.8824  |
| ligand080 | -69.6612 | -16.8874 | 3.4169  | -35.0066 | 4.2755  | -41.1789 | 4.1015  |
| ligand081 | -71.7484 | -13.0774 | 2.6611  | -38.7228 | 4.1238  | -42.3767 | 4.3317  |
| ligand082 | -61.2978 | -26.3595 | 6.2414  | -33.5279 | 5.3501  | -34.0035 | 4.7639  |
| ligand083 | -59.3795 | -9.9978  | 2.0301  | -29.6594 | 4.8753  | -35.776  | 4.7232  |
| ligand084 | -54.097  | -23.7635 | 2.3624  | -37.9415 | 4.9055  | -37.9585 | 4.9931  |
| ligand085 | -63.4112 | -28.8462 | 3.7012  | -46.8929 | 5.6273  | -53.0954 | 4.764   |
| ligand086 | -64.0652 | -24.1039 | 3.3229  | -27.5051 | 5.1579  | -27.3239 | 4.9696  |
| ligand087 | -74.9419 | -23.9756 | 2.8688  | -52.3631 | 5.2335  | -52.5727 | 5.3233  |
| ligand088 | -58.0237 | -58.1458 | 11.1199 | 17.0427  | 15.7403 | 18.3456  | 15.8193 |
| ligand089 | -59.8896 | -18.2351 | 2.6613  | -36.9802 | 3.8054  | -37.2214 | 3.8015  |
| ligand090 | -53.3426 | -12.1541 | 2.6997  | -25.0527 | 3.3398  | -26.4884 | 3.077   |
| ligand091 | -62.2655 | -7.7255  | 4.5078  | -20.7097 | 7.2178  | -30.8593 | 5.6077  |
| ligand092 | -61.3196 | -20.8823 | 3.8516  | -48.4652 | 5.353   | -55.8779 | 5.1915  |
| ligand093 | -72.3266 | -6.5243  | 2.2148  | -26.197  | 5.9291  | -36.8082 | 5.3705  |
| ligand094 | -74.3022 | -16.6037 | 3.7161  | -38.1309 | 4.845   | -39.3937 | 4.8086  |
| ligand095 | -67.3977 | -11.013  | 3.4533  | -24.2505 | 4.6258  | -27.6471 | 4.0534  |
| ligand096 | -66.3829 | -13.5316 | 3.0759  | -31.738  | 5.3415  | -36.2814 | 4.9797  |
| ligand097 | -67.3384 | -16.6438 | 3.5108  | -35.6906 | 4.4135  | -37.8931 | 4.3018  |
| ligand098 | -66.2933 | -23.4419 | 3.2269  | -37.9705 | 5.6931  | -42.048  | 6.0788  |
| ligand099 | -73.9308 | -22.7118 | 3.2814  | -48.1406 | 6.2709  | -48.8231 | 6.3252  |
| ligand100 | -69.3473 | -28.4515 | 2.6137  | -67.2742 | 6.3943  | -68.3675 | 6.688   |
| ligand101 | -63.5795 | -29.112  | 2.3626  | -64.1095 | 5.7418  | -66.7231 | 5.7125  |
| ligand102 | -63.7439 | -13.8578 | 2.528   | -28.8887 | 3.5384  | -30.412  | 3.3854  |
| ligand103 | -69.7165 | -12.8003 | 2.9752  | -37.532  | 4.5665  | -43.9415 | 4.7423  |
| ligand104 | -70.2701 | -14.839  | 3.0236  | -35.9325 | 5.2444  | -38.2532 | 5.0627  |
| ligand105 | -66.0701 | -28.6886 | 4.375   | -40.8876 | 4.5482  | -38.5822 | 4.5868  |
| ligand106 | -52.2063 | -25.7539 | 2.5265  | -37.4728 | 3.2647  | -37.4076 | 3.2326  |
| ligand107 | -69.2833 | -13.1832 | 2.391   | -34.6379 | 4.9735  | -38.1388 | 4.7287  |
| ligand108 | -70.5368 | -22.0712 | 3.2283  | -37.1055 | 4.247   | -37.2245 | 4.1329  |
| ligand109 | -59.8842 | -21.3823 | 3.9751  | -37.4043 | 6.8763  | -38.2036 | 6.6077  |
| ligand110 | -64.4591 | -14.8865 | 3.0916  | -25.6238 | 4.8976  | -31.6355 | 4.5349  |
| ligand111 | -67.6769 | -31.2735 | 3.416   | -48.8912 | 3.4145  | -48.7255 | 3.4119  |
| ligand112 | -60.1293 | -13.7035 | 2.3875  | -37.6689 | 6.1445  | -41.1534 | 6.4652  |
| ligand113 | -62.856  | -10.9394 | 3.08    | -24.2261 | 4.2162  | -30.8907 | 3.9605  |
| ligand114 | -71.7494 | -21.1295 | 2.9449  | -62.2891 | 7.3226  | -65.5251 | 7.3669  |
| ligand115 | -59.7655 | -8.5944  | 3.5732  | -24.8125 | 3.3623  | -26.1043 | 3.136   |
| ligand116 | -63.9563 | -23.2668 | 4.6816  | -76.9382 | 9.4384  | -78.3601 | 9.8625  |

## Supplementary Material

|           |          |                   |        |          |        |          |         |
|-----------|----------|-------------------|--------|----------|--------|----------|---------|
| ligand117 | -60.9184 | -10.5846          | 2.4383 | -36.864  | 6.3206 | -39.245  | 6.769   |
| ligand118 | -69.8778 | -11.5607          | 2.366  | -33.158  | 6.0891 | -34.726  | 5.3699  |
| ligand119 | -56.5269 | -10.1941          | 2.2083 | -37.2215 | 8.2025 | -36.1398 | 8.5677  |
| ligand120 | -67.9796 | -13.701           | 4.3096 | -45.0468 | 5.6765 | -47.117  | 5.4492  |
| ligand121 | -64.2745 | -6.4395           | 2.5982 | -28.9821 | 5.9634 | -47.5093 | 7.265   |
| ligand122 | -76.5224 | -26.7604          | 2.2327 | -46.3806 | 4.3415 | -48.2715 | 4.4234  |
| ligand123 | -69.1204 | -22.1982          | 3.9858 | -44.6729 | 8.5425 | -44.6911 | 8.3511  |
| ligand124 | -65.9818 | -13.5975          | 2.0402 | -39.7259 | 4.9398 | -43.7535 | 5.6331  |
| ligand125 | -76.5635 | -27.5128          | 2.9111 | -55.3004 | 5.7577 | -54.838  | 5.7483  |
| ligand126 | -56.559  | -5.1774           | 2.0858 | -61.8732 | 8.9648 | -66.4918 | 9.4267  |
| ligand127 | -64.7717 | -5.4762           | 2.434  | -44.0609 | 8.6876 | -59.3237 | 11.7502 |
| ligand128 | -67.3177 | -18.0654          | 3.0496 | -44.8651 | 3.9001 | -54.8976 | 4.4749  |
| ligand129 | -67.1942 | -26.0253          | 3.3845 | -43.2809 | 4.578  | -41.7903 | 4.7114  |
| ligand130 | -66.9603 | -8.813            | 1.6837 | -34.4504 | 5.6656 | -34.1762 | 5.9098  |
| ligand131 | -60.4024 | -8.0183           | 2.1334 | -36.7027 | 5.3461 | -43.9515 | 6.1418  |
| ligand132 | -64.4603 | -4.1068           | 1.8712 | -30.7105 | 5.2011 | -46.3062 | 6.42    |
| ligand133 | -63.9933 | -28.0447          | 3.8219 | -56.9335 | 6.8881 | -58.5322 | 7.3254  |
| ligand134 | -67.9805 | -22.2888          | 4.2584 | -38.5257 | 3.9776 | -38.9583 | 3.7893  |
| ligand135 | -64.9548 | -26.2629          | 2.7554 | -52.9438 | 4.5813 | -51.5265 | 4.5376  |
| ligand136 | -57.0219 | -12.8938          | 3.2541 | -34.2165 | 6.2833 | -35.1906 | 6.5981  |
| ligand137 | -65.1983 | -19.0811          | 2.5326 | -43.4466 | 4.6102 | -45.1589 | 4.3869  |
| ligand138 | -56.8348 | -21.3134          | 2.6695 | -44.5697 | 4.0129 | -44.3266 | 4.0962  |
| ligand139 | -76.3645 | -10.9957          | 2.7371 | -87.0629 | 6.6739 | -104.01  | 6.7161  |
| ligand140 | -56.8394 | -30.2281          | 4.2369 | -65.8742 | 7.1152 | -66.586  | 6.9872  |
| ligand141 | -48.9406 | -8.8193           | 6.3755 | -19.3696 | 9.1029 | -24.7261 | 9.2029  |
| ligand142 | -57.0461 | -34.1608          | 4.8    | -65.5992 | 5.7447 | -64.3774 | 5.6967  |
| ligand143 | -46.7731 | N.C. <sup>a</sup> | N.C.   | N.C.     | N.C.   | N.C.     | N.C.    |
| ligand144 | -48.634  | -11.3008          | 2.4494 | -20.0383 | 4.6914 | -19.548  | 4.6824  |
| ligand145 | -51.9429 | -8.6299           | 1.594  | -20.4152 | 2.6186 | -20.4491 | 2.5082  |
| ligand146 | -10.2936 | -25.0539          | 2.7329 | -43.0878 | 3.9332 | -45.9318 | 3.9303  |
| ligand147 | -14.5735 | -27.7923          | 3.1104 | -43.6805 | 4.3546 | -44.7539 | 4.1073  |
| ligand148 | -53.4639 | -22.7106          | 2.6447 | -67.6424 | 7.2292 | -72.3342 | 8.1724  |
| ligand149 | -57.9496 | -22.4331          | 2.7199 | -57.3421 | 5.9767 | -57.9851 | 5.931   |
| ligand150 | -72.5411 | -34.8862          | 7.5047 | -63.9587 | 7.309  | -65.0804 | 7.4556  |
| ligand151 | -49.398  | -11.6664          | 3.2739 | -21.9278 | 4.2838 | -21.5417 | 3.9873  |
| ligand152 | -64.9399 | -25.8227          | 4.5807 | -30.7872 | 4.8292 | -29.947  | 4.5259  |
| ligand153 | -57.8529 | -9.899            | 1.747  | -18.5574 | 4.1369 | -19.0035 | 4.376   |
| ligand154 | -56.663  | -7.0777           | 2.8903 | -22.2051 | 4.2664 | -25.2578 | 3.4253  |
| ligand155 | -61.1707 | -25.1039          | 5.2952 | -41.2699 | 5.4217 | -44.3384 | 4.9008  |
| ligand156 | -62.4571 | -13.5639          | 2.0695 | -35.642  | 4.5337 | -45.0307 | 4.6463  |

## Supplementary Material

|           |          |          |         |          |         |          |         |
|-----------|----------|----------|---------|----------|---------|----------|---------|
| ligand157 | -59.2612 | -16.1505 | 2.8485  | -17.1249 | 3.294   | -16.2868 | 3.2998  |
| ligand158 | -56.4781 | -13.4357 | 1.9941  | -30.448  | 3.3473  | -33.0027 | 3.151   |
| ligand159 | -60.2436 | -16.5121 | 3.4145  | -25.9267 | 4.4326  | -25.5393 | 4.3233  |
| ligand160 | -55.9052 | -12.5023 | 2.7328  | -24.0483 | 4.366   | -23.1029 | 4.5805  |
| ligand161 | -69.1778 | -22.6861 | 2.8152  | -38.1956 | 4.2913  | -38.9248 | 3.9625  |
| ligand162 | -62.8588 | -6.7878  | 2.7123  | -24.898  | 5.5726  | -34.12   | 4.4075  |
| ligand163 | -74.6895 | -20.3915 | 2.3875  | -39.496  | 3.4611  | -43.2879 | 3.2451  |
| ligand164 | -68.5209 | -10.6742 | 4.8846  | -30.3826 | 5.0588  | -36.9255 | 4.2296  |
| ligand165 | -69.3089 | -20.0627 | 2.2835  | -21.0938 | 2.6128  | -20.7375 | 2.6651  |
| ligand166 | -79.9142 | -19.5202 | 3.6997  | -45.0312 | 4.8394  | -45.5353 | 4.6524  |
| ligand167 | -63.478  | -5.2245  | 2.0335  | -17.5959 | 3.8246  | -24.6564 | 3.7176  |
| ligand168 | -61.1631 | -21.1082 | 2.7806  | -33.7955 | 4.2168  | -33.1759 | 4.4548  |
| ligand169 | -71.6199 | -7.2847  | 1.8159  | -20.0259 | 4.2515  | -26.3637 | 4.8115  |
| ligand170 | -73.7881 | -27.8959 | 3.3293  | -41.0789 | 4.1241  | -40.2488 | 4.0609  |
| ligand171 | -66.1003 | -9.7904  | 4.8106  | -25.9792 | 6.8146  | -29.9411 | 5.8724  |
| ligand172 | -75.1149 | -19.9938 | 3.319   | -49.9964 | 5.8396  | -51.8761 | 5.7312  |
| ligand173 | -59.3353 | -23.0202 | 3.0658  | -39.4155 | 4.6046  | -39.8081 | 4.6889  |
| ligand174 | -59.0864 | -16.4299 | 3.4422  | -59.0487 | 7.3939  | -69.8096 | 6.9799  |
| ligand175 | -58.314  | -25.3725 | 4.7069  | -58.8792 | 5.3481  | -59.3407 | 5.4889  |
| ligand176 | -56.7707 | -1.8751  | 1.9494  | -18.8231 | 5.8757  | -26.4222 | 6.5943  |
| ligand177 | -64.2868 | -15.0159 | 2.6012  | -36.9827 | 4.5452  | -39.8631 | 4.3537  |
| ligand178 | -56.6888 | -17.1289 | 2.7963  | -43.5759 | 7.0921  | -44.7641 | 7.353   |
| ligand179 | -70.4442 | -51.3429 | 32.5702 | 42.1334  | 28.5713 | 35.9547  | 32.2512 |
| ligand180 | -63.7411 | -17.1326 | 5.2238  | -62.9475 | 7.5652  | -67.7415 | 7.5802  |
| ligand181 | -65.7001 | -36.8695 | 5.1799  | -52.5502 | 6.9064  | -52.0103 | 6.7319  |
| ligand182 | -70.8937 | -20.8008 | 2.5987  | -51.1267 | 4.7086  | -53.3749 | 4.4505  |
| ligand183 | -52.1796 | -13.1449 | 3.4487  | -28.8064 | 3.0846  | -30.3125 | 3.1787  |
| ligand184 | -73.2016 | -13.1739 | 3.0689  | -31.653  | 4.9121  | -35.4418 | 5.4295  |
| ligand185 | -67.3188 | -11.5485 | 2.4726  | -24.3334 | 4.4598  | -28.0656 | 4.2824  |
| ligand186 | -66.8783 | -25.7371 | 2.8559  | -35.2515 | 4.2988  | -34.6833 | 4.236   |
| ligand187 | -67.6387 | -10.8571 | 1.8155  | -27.2057 | 4.3283  | -31.4312 | 4.6246  |
| ligand188 | -62.3996 | -6.4654  | 2.8527  | -28.4051 | 5.18    | -32.8543 | 5.3793  |
| ligand189 | -64.8109 | -15.4189 | 2.2997  | -37.9264 | 4.9656  | -48.708  | 4.7055  |
| ligand190 | -57.8165 | -21.1691 | 3.2791  | -29.3261 | 4.0087  | -29.1364 | 4.0367  |
| ligand191 | -79.7168 | -46.123  | 4.4454  | -72.6894 | 6.5824  | -72.6266 | 6.5806  |
| ligand192 | -76.8963 | -38.3967 | 6.1233  | -65.7506 | 5.8358  | -65.8462 | 5.842   |
| ligand193 | -63.7203 | -7.8033  | 2.8725  | -20.8565 | 5.5539  | -25.147  | 4.5778  |
| ligand194 | -69.4294 | -10.4809 | 2.3617  | -22.8462 | 5.9693  | -24.1586 | 6.2223  |
| ligand195 | -53.2197 | -28.8689 | 2.8385  | -54.5666 | 4.3629  | -61.3114 | 4.5289  |
| ligand196 | -67.046  | -20.1102 | 2.9626  | -36.5966 | 4.3013  | -36.3284 | 3.919   |

## Supplementary Material

|           |          |          |        |          |         |          |         |
|-----------|----------|----------|--------|----------|---------|----------|---------|
| ligand197 | -63.7956 | -11.6409 | 1.8854 | -26.465  | 4.7603  | -37.8774 | 4.6515  |
| ligand198 | -70.5188 | -13.2814 | 2.7791 | -32.4145 | 4.385   | -33.7524 | 4.1791  |
| ligand199 | -67.9146 | -20.736  | 2.7947 | -34.4795 | 4.5589  | -33.8366 | 4.5007  |
| ligand200 | -71.2994 | -11.6572 | 2.1841 | -33.3921 | 3.9938  | -37.3835 | 3.9372  |
| ligand201 | -66.3797 | -18.7674 | 2.8653 | -37.5998 | 4.4125  | -37.2656 | 4.4289  |
| ligand202 | -78.068  | -9.4259  | 2.6534 | -40.7696 | 7.3097  | -43.0382 | 8.867   |
| ligand203 | -72.5487 | -17.3333 | 2.6453 | -32.6377 | 3.8939  | -35.465  | 3.4627  |
| ligand204 | -78.2098 | -6.1651  | 2.2001 | -23.9079 | 6.1955  | -36.8454 | 5.1338  |
| ligand205 | -65.8803 | -28.6449 | 4.1472 | -46.9953 | 4.802   | -46.8074 | 4.6491  |
| ligand206 | -52.7776 | -12.9224 | 2.5765 | -42.3098 | 4.8569  | -45.0965 | 4.741   |
| ligand207 | -61.2254 | -34.328  | 3.5354 | -45.9448 | 3.6675  | -45.5425 | 3.4801  |
| ligand208 | -64.5766 | -13.6611 | 3.5179 | -37.3004 | 6.6619  | -40.66   | 4.5607  |
| ligand209 | -59.6978 | -9.7162  | 2.7962 | -28.23   | 5.6408  | -32.1133 | 5.0077  |
| ligand210 | -65.0904 | -20.8745 | 2.5426 | -34.9402 | 3.4279  | -34.4106 | 3.5621  |
| ligand211 | -78.2073 | -30.345  | 3.611  | -54.1674 | 5.2757  | -58.2354 | 5.5337  |
| ligand212 | -63.3281 | -15.4205 | 3.0363 | -29.4227 | 3.5145  | -30.2998 | 3.1152  |
| ligand213 | -67.647  | -31.19   | 2.804  | -49.6638 | 4.1951  | -49.1241 | 4.1818  |
| ligand214 | -67.8396 | -27.8061 | 4.0682 | -40.6361 | 3.8899  | -40.3139 | 3.9114  |
| ligand215 | -71.893  | -28.1454 | 2.2716 | -39.1514 | 2.7195  | -38.8866 | 2.711   |
| ligand216 | -71.1676 | -15.933  | 4.111  | -44.2394 | 6.6991  | -46.069  | 6.7544  |
| ligand217 | -47.6016 | -27.4796 | 4.0908 | -51.8482 | 4.7926  | -56.2562 | 4.4999  |
| ligand218 | -72.984  | -19.944  | 2.7821 | -59.6746 | 6.441   | -62.1944 | 6.5827  |
| ligand219 | -75.8496 | -30.7224 | 8.4864 | -55.7527 | 7.9433  | -57.7375 | 7.9118  |
| ligand220 | -59.8716 | -9.1659  | 2.5978 | -23.7263 | 4.8404  | -32.5132 | 4.5325  |
| ligand221 | -50.9974 | -11.8898 | 1.8228 | -25.6489 | 4.2472  | -25.5513 | 3.9871  |
| ligand222 | -66.2638 | -21.8056 | 2.5777 | -35.1762 | 3.8736  | -35.4985 | 3.7887  |
| ligand223 | -66.4069 | -19.2904 | 2.4959 | -37.1371 | 4.5396  | -38.785  | 4.3354  |
| ligand224 | -56.0219 | -27.1319 | 3.1854 | -37.123  | 3.9238  | -36.5379 | 3.9559  |
| ligand225 | -68.2101 | -6.3369  | 3.3214 | -26.535  | 7.2789  | -38.6083 | 5.4452  |
| ligand226 | -73.7114 | -32.9699 | 4.1909 | -57.8433 | 6.7636  | -57.4721 | 6.6257  |
| ligand227 | -69.1126 | -29.3036 | 4.9348 | -43.9389 | 4.9211  | -43.3423 | 5.0379  |
| ligand228 | -67.6682 | -13.2307 | 4.1266 | -32.6304 | 6.6458  | -37.3558 | 5.0129  |
| ligand229 | -45.2809 | -14.3321 | 1.9959 | -17.1186 | 2.0591  | -16.979  | 2.0584  |
| ligand230 | -47.4811 | -8.9305  | 1.839  | -17.3416 | 2.5633  | -16.5277 | 2.5779  |
| ligand231 | -56.1843 | -13.1714 | 8.4831 | -51.7635 | 10.1951 | -51.2307 | 10.8529 |
| ligand232 | -63.9422 | -17.2528 | 3.1863 | -28.568  | 6.3088  | -33.8454 | 5.3024  |
| ligand233 | -41.738  | -3.2399  | 1.8562 | -10.4455 | 2.6507  | -12.4792 | 2.4997  |
| ligand234 | -61.9853 | -7.1577  | 2.2367 | -27.6706 | 4.455   | -30.1614 | 4.4362  |
| ligand235 | -67.1502 | -9.1115  | 3.4776 | -9.0867  | 7.1202  | -16.3453 | 7.1599  |
| ligand236 | -55.0482 | -12.3233 | 2.0402 | -27.3953 | 2.7565  | -27.2681 | 2.5791  |

## Supplementary Material

|           |          |          |        |          |         |          |         |
|-----------|----------|----------|--------|----------|---------|----------|---------|
| ligand237 | -50.6047 | -6.2756  | 1.5452 | -18.9907 | 3.8394  | -25.0382 | 3.4766  |
| ligand238 | -56.5132 | -19.1742 | 2.0641 | -31.0172 | 4.3451  | -31.144  | 4.317   |
| ligand239 | -61.8579 | -21.3432 | 2.7985 | -28.7652 | 3.9628  | -28.4016 | 3.8141  |
| ligand240 | -67.8444 | -15.6756 | 2.5788 | -36.57   | 6.894   | -36.5467 | 7.1474  |
| ligand241 | -60.8371 | -6.7836  | 2.4253 | -64.5954 | 9.2973  | -69.3195 | 10.0458 |
| ligand242 | -59.0115 | -1.5144  | 8.8097 | -38.4215 | 11.4511 | -43.0754 | 12.6861 |
| ligand243 | -73.0766 | -19.9739 | 4.1044 | -52.5288 | 7.8475  | -61.6321 | 7.8214  |
| ligand244 | -65.428  | -27.994  | 2.8368 | -43.0929 | 3.5848  | -43.4779 | 3.4983  |
| ligand245 | -64.9728 | -18.4317 | 2.1477 | -37.544  | 4.1217  | -38.5387 | 4.0544  |
| ligand246 | -70.3445 | -11.6411 | 3.8245 | -10.6879 | 6.9391  | -20.2749 | 5.9844  |
| ligand247 | -66.6945 | -10.2743 | 2.6126 | -29.6524 | 4.6148  | -33.2683 | 4.4928  |
| ligand248 | 32.2442  | -15.727  | 2.5318 | -39.7411 | 6.2748  | -56.7722 | 6.0825  |
| ligand249 | -52.7841 | -11.1406 | 3.4815 | -56.8245 | 7.4294  | -62.5621 | 7.3369  |
| ligand250 | -61.6969 | -16.6067 | 3.6062 | -87.5664 | 9.2861  | -90.4458 | 9.8479  |
| ligand251 | -65.6978 | 121.1435 | 8.4831 | -88.1546 | 11.8396 | -88.1135 | 11.8949 |
| ligand252 | -53.2483 | -7.0629  | 2.4125 | -16.1631 | 3.4814  | -16.4186 | 3.9219  |
| ligand253 | -57.5191 | -8.5814  | 2.373  | -26.1542 | 7.2657  | -25.7846 | 7.4483  |
| ligand254 | -71.8124 | -10.4137 | 2.7668 | -26.7684 | 5.8077  | -33.4725 | 6.3985  |
| ligand255 | -47.9181 | -3.8412  | 2.3377 | -17.083  | 3.5436  | -19.7871 | 2.9164  |
| ligand256 | -65.6021 | -13.7219 | 2.732  | -48.1533 | 5.2679  | -49.7457 | 4.7357  |
| ligand257 | -67.4186 | -14.7838 | 2.5965 | -38.5911 | 4.3933  | -38.2294 | 4.2607  |
| ligand258 | -64.6614 | -7.9584  | 2.5868 | -17.9373 | 6.2825  | -17.1604 | 6.1518  |
| ligand259 | -71.2288 | -14.8427 | 3.8757 | -32.818  | 4.5659  | -33.2489 | 4.0787  |
| ligand260 | -67.7256 | -13.6639 | 3.223  | -31.0864 | 3.5448  | -31.1751 | 3.389   |
| ligand261 | -56.8008 | -12.1589 | 1.7437 | -30.1946 | 4.6597  | -31.7546 | 4.3456  |
| ligand262 | -62.5083 | -11.9536 | 2.4033 | -32.761  | 3.7789  | -36.5426 | 3.5141  |
| ligand263 | -74.4096 | -16.7771 | 2.8802 | -34.1041 | 5.685   | -39.4309 | 5.5968  |
| ligand264 | -51.1618 | -15.0359 | 1.7386 | -21.4606 | 1.9823  | -20.8915 | 2.0252  |
| ligand265 | -69.4886 | -8.4249  | 3.809  | -26.4138 | 5.6282  | -29.6505 | 5.2242  |
| ligand266 | -62.0072 | -15.9645 | 4.5798 | -33.2804 | 4.695   | -34.9634 | 4.5794  |
| ligand267 | -59.4927 | -12.1002 | 2.368  | -30.3392 | 4.4666  | -30.8368 | 4.0487  |
| ligand268 | -65.5182 | -10.8868 | 2.7848 | -22.1707 | 4.064   | -22.104  | 4.0983  |
| ligand269 | -67.7304 | -9.7693  | 2.5646 | -28.0334 | 4.4176  | -30.2586 | 4.8849  |
| ligand270 | -64.0143 | -32.2699 | 3.1206 | -45.1684 | 3.4301  | -43.1681 | 3.3381  |
| ligand271 | -69.1175 | -6.7645  | 3.0654 | -29.8546 | 5.4604  | -43.9689 | 4.3639  |
| ligand272 | -72.9702 | -23.3575 | 2.0194 | -50.1284 | 4.357   | -52.7754 | 4.5235  |
| ligand273 | -75.1801 | -28.9857 | 3.3054 | -46.8009 | 4.5373  | -50.1468 | 4.2735  |
| ligand274 | -54.7818 | -11.7122 | 1.8066 | -34.1333 | 5.6106  | -37.4131 | 5.8293  |
| ligand275 | -51.238  | -7.4771  | 1.7953 | -18.7705 | 3.1924  | -18.6023 | 3.1156  |
| ligand276 | -61.6155 | -28.8627 | 2.7181 | -47.4012 | 4.2554  | -46.6661 | 4.1033  |

## Supplementary Material

|           |          |          |        |          |         |          |        |
|-----------|----------|----------|--------|----------|---------|----------|--------|
| ligand277 | -58.0128 | -16.3407 | 1.706  | -27.8847 | 2.9704  | -28.5341 | 2.7964 |
| ligand278 | -65.2554 | -20.8158 | 2.2706 | -37.6751 | 3.6513  | -38.3856 | 3.4891 |
| ligand279 | -64.21   | -21.2075 | 2.5112 | -37.9437 | 3.4479  | -37.6621 | 3.3321 |
| ligand280 | -71.5663 | -24.7669 | 2.1131 | -45.8283 | 4.0445  | -45.4881 | 3.954  |
| ligand281 | -63.8808 | -9.5522  | 3.0951 | -36.2339 | 6.3469  | -43.1296 | 6.3005 |
| ligand282 | -66.9065 | -13.8036 | 2.4753 | -37.5668 | 4.8775  | -39.1892 | 5.187  |
| ligand283 | -66.9817 | -11.687  | 4.9716 | -26.8355 | 6.0129  | -29.117  | 5.0411 |
| ligand284 | -65.5844 | -12.4303 | 2.7927 | -26.1905 | 4.8065  | -28.7869 | 5.0054 |
| ligand285 | -60.7934 | -6.3036  | 2.6511 | -24.4371 | 4.9476  | -25.1572 | 5.2002 |
| ligand286 | -66.6176 | -20.6622 | 2.6037 | -34.9587 | 3.8781  | -36.6063 | 3.8866 |
| ligand287 | -58.3294 | -28.616  | 2.8714 | -27.409  | 3.859   | -26.7698 | 3.8767 |
| ligand288 | -58.1062 | -10.8518 | 3.1864 | -27.9087 | 4.121   | -26.8463 | 4.31   |
| ligand289 | -53.4796 | -11.6067 | 2.9648 | -28.1237 | 4.2079  | -27.2882 | 4.1662 |
| ligand290 | -75.553  | -13.3068 | 2.2563 | -36.9236 | 4.1002  | -38.6941 | 4.2249 |
| ligand291 | -65.8609 | -7.672   | 3.7979 | -25.9794 | 5.4419  | -30.2345 | 4.2466 |
| ligand292 | -61.9178 | -15.7243 | 2.054  | -31.7327 | 3.3588  | -31.3728 | 3.3936 |
| ligand293 | -69.4667 | -4.2612  | 1.6172 | -23.4293 | 5.0936  | -27.6801 | 5.2623 |
| ligand294 | -63.9003 | -15.5841 | 2.3314 | -34.7938 | 4.4416  | -37.2337 | 4.8324 |
| ligand295 | -60.6756 | -16.1904 | 2.8908 | -43.2105 | 4.3925  | -43.4563 | 4.533  |
| ligand296 | -62.7994 | -23.3038 | 3.35   | -48.065  | 5.1916  | -47.1473 | 5.2744 |
| ligand297 | -65.0764 | -17.3419 | 2.8816 | -31.7829 | 3.887   | -31.8935 | 3.8436 |
| ligand298 | -60.473  | -14.4786 | 3.3339 | -24.0557 | 4.4785  | -23.2799 | 4.5394 |
| ligand299 | -69.0728 | -8.73    | 2.5304 | -27.3466 | 4.7676  | -31.0865 | 4.6122 |
| ligand300 | -76.7561 | -25.5699 | 2.6408 | -45.5002 | 4.5243  | -48.1439 | 4.1686 |
| ligand301 | -60.7074 | -15.1272 | 3.6841 | -10.2768 | 8.3391  | -13.523  | 8.7663 |
| ligand302 | -70.1492 | -9.4296  | 3.6615 | -32.8503 | 7.3038  | -41.9771 | 7.3301 |
| ligand303 | -66.2763 | -17.4672 | 5.3876 | -29.6815 | 6.8725  | -30.4875 | 6.5303 |
| ligand304 | -69.466  | -24.3649 | 3.612  | -56.2515 | 7.0272  | -55.4911 | 6.9464 |
| ligand305 | -64.9064 | -15.4437 | 2.7832 | -36.2559 | 4.579   | -37.4538 | 4.4983 |
| ligand306 | -60.6485 | -9.8518  | 3.1702 | -24.6409 | 4.79    | -30.06   | 3.8973 |
| ligand307 | -54.2965 | -5.9918  | 2.7704 | -30.9901 | 4.1938  | -30.1517 | 4.2736 |
| ligand308 | -55.8192 | -19.8117 | 3.0316 | -37.4146 | 3.8848  | -36.4057 | 3.5888 |
| ligand309 | -67.9988 | -20.2174 | 3.1221 | -60.6255 | 6.4093  | -59.0682 | 6.5702 |
| ligand310 | -75.1061 | -7.0532  | 2.8522 | -42.4082 | 11.3884 | -45.7546 | 9.3672 |
| ligand311 | -56.0826 | -10.4626 | 1.535  | -31.1568 | 4.6568  | -32.3766 | 4.4659 |
| ligand312 | -57.2739 | -22.1036 | 2.7105 | -34.56   | 4.503   | -34.3421 | 4.4941 |
| ligand313 | -58.7657 | -11.8712 | 2.2117 | -26.8865 | 3.7616  | -27.5136 | 3.5101 |
| ligand314 | -54.0883 | -12.4618 | 2.7415 | -25.9966 | 3.7102  | -26.6254 | 3.7352 |
| ligand315 | -51.7358 | -4.8341  | 2.2633 | -22.0715 | 3.9762  | -28.3251 | 3.8617 |
| ligand316 | -59.2035 | -21.4178 | 3.1232 | -46.4189 | 5.3705  | -48.459  | 5.1284 |

## Supplementary Material

|           |          |          |        |          |        |          |         |
|-----------|----------|----------|--------|----------|--------|----------|---------|
| ligand317 | -56.4038 | -3.4729  | 1.6844 | -16.7474 | 6.8405 | -23.6356 | 6.5466  |
| ligand318 | -64.667  | -7.5075  | 3.5578 | -33.8843 | 5.4636 | -43.7219 | 6.7952  |
| ligand319 | -74.5772 | -12.4875 | 3.0812 | -38.9624 | 5.8829 | -42.3179 | 6.065   |
| ligand320 | -56.0198 | 0.0856   | 0.1144 | -21.5086 | 3.8891 | -34.4054 | 7.527   |
| ligand321 | -63.9938 | -21.7123 | 2.9605 | -39.9689 | 4.2431 | -39.0652 | 4.1039  |
| ligand322 | -58.94   | -8.7918  | 2.6829 | -36.7927 | 6.8004 | -38.4018 | 6.8477  |
| ligand323 | -58.7592 | -15.4459 | 2.2278 | -36.3768 | 3.9309 | -37.3484 | 3.7782  |
| ligand324 | -55.9566 | -9.1872  | 4.2519 | -65.2867 | 6.2991 | -65.8232 | 6.9434  |
| ligand325 | -55.6751 | -25.696  | 3.1051 | -53.1236 | 4.1386 | -50.0026 | 4.1734  |
| ligand326 | -66.8882 | -6.6825  | 1.988  | -36.6035 | 4.9634 | -39.679  | 5.2302  |
| ligand327 | -64.4418 | -7.1953  | 2.9712 | -28.8742 | 4.4505 | -29.0718 | 4.7743  |
| ligand328 | -54.7935 | -16.0179 | 3.2445 | -48.7324 | 6.1398 | -48.3924 | 6.2444  |
| ligand329 | -63.8868 | -2.3197  | 1.4736 | -31.4364 | 4.5482 | -37.0518 | 4.8182  |
| ligand330 | -54.2386 | -14.7825 | 2.3378 | -22.6235 | 3.1906 | -22.4303 | 3.15    |
| ligand331 | -63.4678 | -0.3748  | 1.1113 | -18.9055 | 6.4324 | -38.3875 | 5.8521  |
| ligand332 | -68.7382 | -30.6904 | 3.844  | -59.1215 | 5.9888 | -63.8057 | 5.9483  |
| ligand333 | -66.0057 | -15.4675 | 2.7508 | -38.7383 | 4.6878 | -40.3911 | 4.7821  |
| ligand334 | -58.7343 | -24.5615 | 4.7556 | -38.4348 | 5.7909 | -37.6674 | 5.7309  |
| ligand335 | -60.5894 | -8.2498  | 1.7347 | -24.6379 | 3.7693 | -27.1354 | 3.8296  |
| ligand336 | -61.9255 | -16.0485 | 2.5742 | -33.4946 | 4.1877 | -32.1089 | 4.3189  |
| ligand337 | -60.8582 | -15.1175 | 3.643  | -30.5968 | 4.2602 | -32.9787 | 3.6598  |
| ligand338 | -51.2814 | -8.2919  | 1.8751 | -20.7984 | 3.4674 | -20.7859 | 3.3233  |
| ligand339 | -52.7959 | -12.5856 | 5.0567 | -28.5631 | 4.5972 | -29.0737 | 4.508   |
| ligand340 | -64.3067 | -15.5582 | 3.1174 | -31.7916 | 4.0505 | -32.7807 | 3.8691  |
| ligand341 | -60.1889 | -19.888  | 3.9729 | -80.5212 | 8.6497 | -84.0791 | 9.2407  |
| ligand342 | -54.0328 | -36.4057 | 7.7564 | -31.7638 | 8.3675 | -33.718  | 9.0905  |
| ligand343 | -76.3087 | -15.6557 | 3.5296 | -57.3898 | 6.8464 | -60.9196 | 7.2951  |
| ligand344 | -64.5742 | -33.4771 | 7.4111 | -45.7079 | 8.1388 | -46.3433 | 7.8935  |
| ligand345 | -68.3927 | -30.4199 | 4.0112 | -58.165  | 6.7738 | -58.978  | 6.7711  |
| ligand346 | -58.0589 | -7.2429  | 2.2694 | -25.1904 | 4.6652 | -27.2682 | 4.9061  |
| ligand347 | -52.241  | -13.1993 | 2.2849 | -35.9283 | 6.4681 | -39.339  | 6.6527  |
| ligand348 | -53.7426 | -9.4574  | 5.6033 | -91.987  | 9.9464 | -100.447 | 10.5183 |
| ligand349 | -63.0484 | -17.6971 | 3.1094 | -37.4864 | 4.1316 | -36.8936 | 3.9083  |
| ligand350 | -66.3432 | -10.6778 | 2.3284 | -32.8861 | 5.8941 | -35.5603 | 5.4559  |
| ligand351 | -65.3405 | -10.2978 | 2.8251 | -40.5417 | 4.8236 | -43.491  | 4.626   |
| ligand352 | -70.6136 | -29.1665 | 2.2834 | -56.3303 | 5.1071 | -56.6365 | 5.1172  |
| ligand353 | -65.4915 | -9.4226  | 2.5864 | -40.4146 | 6.0873 | -44.4198 | 5.9091  |
| ligand354 | -67.2653 | -18.8309 | 2.327  | -52.983  | 4.4163 | -54.7261 | 4.3362  |
| ligand355 | -63.8608 | -31.5258 | 4.254  | -55.7986 | 6.2321 | -55.8639 | 6.2457  |
| ligand356 | -55.4477 | -2.9538  | 2.6273 | -24.1427 | 5.0721 | -37.5909 | 4.2955  |

## Supplementary Material

|           |          |          |        |          |         |          |         |
|-----------|----------|----------|--------|----------|---------|----------|---------|
| ligand357 | -55.3212 | -4.2628  | 1.8668 | -17.694  | 5.1561  | -18.6696 | 4.847   |
| ligand358 | -62.2785 | -7.4946  | 1.9198 | -29.3235 | 4.0544  | -32.2147 | 4.862   |
| ligand359 | -57.2271 | -16.4595 | 2.7353 | -31.6165 | 4.1614  | -32.1805 | 4.3735  |
| ligand360 | -54.5854 | -2.3985  | 2.7135 | -26.0463 | 5.2333  | -29.615  | 6.3198  |
| ligand361 | -73.0095 | -20.6918 | 4.0746 | -70.0002 | 8.2872  | -76.0631 | 8.4627  |
| ligand362 | -62.3862 | -16.3424 | 2.0336 | -33.0645 | 5.7695  | -34.8397 | 5.0561  |
| ligand363 | -64.4631 | -4.7412  | 2.6598 | -45.2779 | 7.7253  | -46.1567 | 8.74    |
| ligand364 | -63.7268 | -26.7609 | 9.6445 | -41.2919 | 12.4895 | -41.5803 | 12.2126 |
| ligand365 | -61.2968 | -10.7671 | 3.1966 | -23.6228 | 7.466   | -24.3019 | 7.1445  |
| ligand366 | -57.057  | -4.7301  | 2.1451 | -24.8958 | 4.4739  | -24.0861 | 4.7311  |
| ligand367 | -73.3829 | -10.2838 | 2.3255 | -36.3636 | 5.6826  | -38.0994 | 5.5338  |
| ligand368 | -63.932  | -11.4661 | 3.053  | -44.3822 | 5.001   | -53.8255 | 5.461   |
| ligand369 | -65.2814 | -3.7286  | 2.1882 | -24.0669 | 6.1658  | -45.4261 | 5.5887  |
| ligand370 | -64.5362 | -19.7608 | 3.6997 | -57.1936 | 6.1522  | -57.034  | 6.3823  |
| ligand371 | -63.1388 | -17.4049 | 2.9458 | -36.2933 | 3.6903  | -35.6676 | 3.8569  |
| ligand372 | -63.5674 | -10.5441 | 2.7875 | -37.0685 | 4.4732  | -40.8392 | 4.6088  |
| ligand373 | -60.2451 | -14.0462 | 5.1034 | -35.9986 | 4.8444  | -36.7666 | 4.7219  |
| ligand374 | -52.5004 | -2.7027  | 1.9534 | -16.7901 | 3.855   | -17.7469 | 3.924   |
| ligand375 | -57.0998 | -10.1238 | 1.656  | -26.6748 | 3.6158  | -27.3025 | 3.798   |
| ligand376 | -56.48   | -15.0418 | 2.0789 | -25.0989 | 2.8035  | -25.0253 | 2.8343  |
| ligand377 | -48.7478 | -16.3638 | 2.6429 | -27.701  | 4.5795  | -29.6395 | 4.5892  |
| ligand378 | -50.7134 | -28.2675 | 6.3006 | -70.3391 | 8.2394  | -71.3132 | 8.5233  |
| ligand379 | -56.3774 | 1.3138   | 3.8841 | -132.675 | 16.2055 | -145.041 | 16.9576 |
| ligand380 | -70.465  | -20.4098 | 3.2985 | -58.6076 | 6.5906  | -60.4268 | 7.4441  |
| ligand381 | -65.1976 | -18.4052 | 2.9355 | -54.617  | 7.0095  | -62.2174 | 6.5956  |
| ligand382 | -73.2092 | -25.9443 | 3.5248 | -61.8842 | 6.9756  | -63.2502 | 7.4611  |
| ligand383 | -76.5039 | -35.5465 | 5.8672 | -70.3314 | 6.6854  | -70.7843 | 6.7085  |
| ligand384 | -72.0449 | -24.7946 | 3.8339 | -59.3636 | 7.1188  | -64.3977 | 7.3712  |
| ligand385 | -60.8048 | -24.9017 | 3.7513 | -47.5371 | 5.5288  | -46.91   | 5.5011  |
| ligand386 | -53.5783 | -11.4759 | 6.6134 | -50.0421 | 7.9924  | -50.4765 | 7.6962  |
| ligand387 | -79.5088 | -50.5868 | 3.2857 | -91.1603 | 8.0343  | -92.9644 | 8.3777  |
| ligand388 | -79.0276 | -42.4267 | 5.4037 | -94.5152 | 8.154   | -101.103 | 8.6886  |
| ligand389 | -85.3408 | -45.1086 | 5.3369 | -107.102 | 7.6834  | -114.361 | 8.3501  |
| ligand390 | -78.1557 | -50.9505 | 5.7516 | -100.879 | 7.7607  | -109.52  | 8.1946  |
| ligand391 | -75.0963 | 1.7092   | 3.6304 | -36.7735 | 6.842   | -49.2418 | 7.352   |
| ligand392 | -80.4299 | -29.8848 | 4.4779 | -73.9536 | 7.6399  | -76.9669 | 7.7527  |
| ligand393 | -74.8032 | -29.3996 | 5.2021 | -63.8901 | 7.1701  | -64.8882 | 7.025   |
| ligand394 | -65.6247 | -13.1624 | 2.1062 | -56.8068 | 7.6821  | -64.8237 | 8.5745  |
| ligand395 | -71.7144 | -20.5341 | 3.863  | -47.3656 | 5.9897  | -48.8866 | 6.5972  |
| ligand396 | -60.7966 | -15.0728 | 2.3988 | -42.3898 | 5.9789  | -44.6499 | 6.1228  |



## Supplementary Material

|           |          |          |        |          |        |          |        |
|-----------|----------|----------|--------|----------|--------|----------|--------|
| ligand397 | -63.2456 | -41.6626 | 4.3989 | -48.0525 | 4.8662 | -47.8904 | 4.8    |
| ligand398 | -55.7726 | -21.4896 | 2.1127 | -39.824  | 4.3754 | -40.1787 | 4.3866 |
| ligand399 | -62.416  | -71.3809 | 5.1013 | -84.2218 | 7.8861 | -84.0609 | 7.6188 |

a Parametrization did not converge

Table S47. AmpC VS docking scores and Nwat-MMGBSA relative binding energies (kcal/mol) computed with Nwat = 0, 30, 60 and 100 (second repetition).

| ligand    | docking score | Nwat=0     |         | Nwat=30    |         | Nwat=60    |         |
|-----------|---------------|------------|---------|------------|---------|------------|---------|
|           |               | $\Delta G$ | St.Dev. | $\Delta G$ | St.Dev. | $\Delta G$ | St.Dev. |
| ligand001 | -70.8736      | -33.4501   | 5.1492  | -76.4401   | 11.2841 | -82.3722   | 10.8057 |
| ligand002 | -52.8033      | -15.03     | 1.9011  | -32.406    | 4.566   | -35.8054   | 4.7337  |
| ligand003 | -63.5714      | -30.3476   | 4.408   | -58.7217   | 6.7842  | -58.5501   | 6.892   |
| ligand004 | -49.2362      | -18.583    | 3.0702  | -87.2196   | 8.9743  | -90.0191   | 9.6044  |
| ligand005 | -60.7895      | -17.4807   | 1.8583  | -27.9053   | 3.2855  | -28.7063   | 3.2045  |
| ligand006 | -69.8091      | -19.0711   | 3.7744  | -33.4097   | 4.5651  | -36.183    | 4.291   |
| ligand007 | -67.2144      | -18.811    | 3.2012  | -40.8117   | 4.7628  | -43.3573   | 4.4497  |
| ligand008 | -67.4472      | -20.5546   | 3.2084  | -22.0654   | 5.1411  | -22.1036   | 5.0512  |
| ligand009 | -71.4682      | -13.2921   | 1.6844  | -30.0612   | 3.6414  | -35.4811   | 3.8149  |
| ligand010 | -57.0116      | -13.8966   | 3.0562  | -30.0721   | 4.4645  | -30.9442   | 3.9979  |
| ligand011 | -51.6189      | -12.8049   | 2.0782  | -26.1217   | 3.6782  | -27.4325   | 3.673   |
| ligand012 | -67.7418      | -6.0637    | 2.868   | -21.1011   | 5.3462  | -34.862    | 4.5209  |
| ligand013 | -65.054       | -15.0534   | 3.8754  | -25.7983   | 4.7814  | -25.7788   | 4.6263  |
| ligand014 | -50.2728      | -11.3099   | 1.7728  | -20.4822   | 4.9701  | -20.682    | 4.8272  |
| ligand015 | -64.5804      | -23.4055   | 2.8196  | -24.469    | 4.2516  | -23.5745   | 4.1469  |
| ligand016 | -65.9719      | -12.2645   | 2.762   | -31.743    | 4.7167  | -35.6167   | 4.5658  |
| ligand017 | -54.402       | -12.5604   | 2.4495  | -24.6758   | 4.237   | -24.5704   | 4.2396  |
| ligand018 | -57.662       | -12.2127   | 2.1431  | -31.8531   | 3.3923  | -32.0227   | 3.4257  |
| ligand019 | -58.9827      | -10.2824   | 2.0664  | -25.7926   | 4.1894  | -27.0694   | 4.8674  |
| ligand020 | -61.5967      | -10.1235   | 1.6413  | -31.539    | 4.0124  | -34.9869   | 3.8646  |
| ligand021 | -59.0583      | -7.9164    | 2.4283  | -21.3334   | 3.2189  | -19.7092   | 3.2314  |
| ligand022 | -51.5326      | -11.9791   | 2.2663  | -25.3546   | 3.8923  | -23.1903   | 3.8595  |
| ligand023 | -56.245       | -19.2267   | 2.5873  | -44.49     | 4.7502  | -48.9204   | 4.6216  |
| ligand024 | -74.2541      | -22.2749   | 2.6824  | -36.1243   | 4.1961  | -36.7666   | 3.8751  |
| ligand025 | -76.2109      | -24.2268   | 3.0268  | -52.8629   | 5.1084  | -57.6948   | 4.909   |
| ligand026 | -60.0403      | -19.6773   | 2.8204  | -40.5396   | 4.8418  | -46.2705   | 4.4913  |
| ligand027 | -72.6273      | -23.7554   | 3.9453  | -47.6507   | 4.7456  | -48.1006   | 4.8169  |
| ligand028 | -54.8108      | -31.1765   | 3.1572  | -47.0695   | 4.4655  | -49.7521   | 4.0927  |
| ligand029 | -48.2129      | -20.2823   | 2.1889  | -44.7591   | 4.4064  | -52.6585   | 4.6045  |
| ligand030 | -67.6425      | -37.5783   | 3.3437  | -56.7791   | 4.612   | -60.8939   | 4.2372  |
| ligand031 | -63.7372      | -21.5195   | 3.8299  | -36.872    | 5.6083  | -40.2315   | 6.2802  |

## Supplementary Material

|           |          |          |        |          |        |          |        |
|-----------|----------|----------|--------|----------|--------|----------|--------|
| ligand032 | -9.74387 | -23.9897 | 2.5202 | -42.0301 | 4.3893 | -46.4233 | 4.4399 |
| ligand033 | -75.3808 | -14.4987 | 3.2823 | -39.032  | 4.9488 | -51.5427 | 4.8945 |
| ligand034 | -69.1925 | -20.4628 | 2.8476 | -36.2602 | 4.1377 | -39.7656 | 4.4006 |
| ligand035 | -73.1411 | -16.8609 | 2.7105 | -37      | 4.1911 | -38.7365 | 3.9561 |
| ligand036 | -66.0336 | -8.8858  | 2.1564 | -25.3682 | 4.9787 | -38.642  | 4.0363 |
| ligand037 | -71.3334 | -28.7706 | 3.5669 | -42.6553 | 4.5878 | -42.6667 | 4.3997 |
| ligand038 | -54.8357 | -20.6242 | 2.2587 | -50.8085 | 4.3085 | -53.4322 | 4.4648 |
| ligand039 | -65.9131 | -18.3883 | 2.1867 | -40.9721 | 4.7778 | -43.3833 | 4.8124 |
| ligand040 | -57.2143 | -16.2965 | 2.6301 | -24.9716 | 5.7508 | -24.1787 | 5.6239 |
| ligand041 | -60.3934 | -35.8206 | 3.9436 | -77.4514 | 7.398  | -87.7827 | 7.6582 |
| ligand042 | -59.9097 | -11.6054 | 2.6278 | -34.3713 | 4.5531 | -38.603  | 4.5547 |
| ligand043 | -73.8069 | -2.5311  | 1.6674 | -9.6624  | 5.5076 | -24.2348 | 5.0666 |
| ligand044 | -65.6142 | -13.6548 | 1.7178 | -35.3856 | 3.883  | -35.2906 | 4.1945 |
| ligand045 | -59.6673 | -9.1234  | 2.0882 | -31.0296 | 4.5379 | -33.0557 | 4.3979 |
| ligand046 | -55.7169 | -30.3773 | 5.2537 | -88.7815 | 8.5496 | -104.797 | 8.8316 |
| ligand047 | -76.953  | -20.2114 | 2.6149 | -41.3806 | 4.4548 | -50.4821 | 4.9993 |
| ligand048 | -77.0919 | -15.6472 | 2.527  | -42.3695 | 5.0358 | -50.4864 | 5.0035 |
| ligand049 | -59.4491 | -18.7754 | 3.2165 | -28.6966 | 4.133  | -28.1829 | 3.9402 |
| ligand050 | -52.8406 | -19.7425 | 2.3584 | -40.5261 | 4.3157 | -53.4963 | 5.0121 |
| ligand051 | -64.3707 | -10.705  | 3.992  | -35.2871 | 4.4006 | -39.1745 | 4.4279 |
| ligand052 | -61.9059 | -14.8723 | 3.5091 | -55.3045 | 6.5451 | -69.6711 | 7.3227 |
| ligand053 | -69.6195 | -8.7112  | 2.543  | -32.2735 | 5.8657 | -39.8826 | 6.772  |
| ligand054 | -78.8004 | -14.2644 | 2.6206 | -47.7456 | 5.2248 | -48.1268 | 4.9253 |
| ligand055 | -62.1473 | -11.3992 | 2.3829 | -37.2918 | 4.6939 | -37.1419 | 4.6284 |
| ligand056 | -73.1321 | -15.5851 | 2.3886 | -36.8533 | 4.1542 | -43.4095 | 4.2231 |
| ligand057 | -70.2812 | -22.9063 | 3.3185 | -53.3906 | 5.43   | -56.0385 | 5.2004 |
| ligand058 | -58.1838 | -17.3435 | 2.2911 | -43.6684 | 4.6116 | -48.9422 | 4.1966 |
| ligand059 | -68.9767 | -19.7922 | 3.8324 | -43.4314 | 4.5395 | -44.7877 | 4.7506 |
| ligand060 | -74.7404 | -14.0003 | 2.4522 | -34.1953 | 4.3887 | -36.8054 | 3.798  |
| ligand061 | -46.8924 | -22.5792 | 2.3953 | -48.4491 | 4.0838 | -52.2444 | 4.1963 |
| ligand062 | -61.2851 | -20.2118 | 2.5732 | -44.5713 | 5.2144 | -50.6261 | 5.6066 |
| ligand063 | -71.6755 | -20.8762 | 2.6322 | -41.9943 | 4.534  | -41.2071 | 4.6885 |
| ligand064 | -52.7141 | -30.5391 | 2.8484 | -52.252  | 3.656  | -57.8125 | 3.4391 |
| ligand065 | -59.1486 | -24.3501 | 3.5398 | -39.1417 | 5.7291 | -38.8186 | 5.5217 |
| ligand066 | -71.0388 | -13.2596 | 3.7906 | -37.3264 | 4.4122 | -41.2258 | 4.5741 |
| ligand067 | -58.5131 | -5.7632  | 2.6098 | -29.977  | 5.1607 | -44.0223 | 5.1521 |
| ligand068 | -60.2162 | -4.3243  | 2.2706 | -26.0732 | 5.9079 | -28.3484 | 7.0692 |
| ligand069 | -69.6281 | -11.1719 | 2.3577 | -37.3834 | 4.7784 | -39.2087 | 4.9943 |
| ligand070 | -60.7594 | -7.0189  | 2.8506 | -42.8846 | 4.3264 | -44.131  | 4.5353 |
| ligand071 | -57.6564 | -17.0555 | 2.7569 | -38.4703 | 3.8786 | -39.7595 | 3.8789 |

## Supplementary Material

|           |          |          |         |          |        |          |         |
|-----------|----------|----------|---------|----------|--------|----------|---------|
| ligand072 | -58.1202 | -6.7795  | 3.0462  | -23.9241 | 4.823  | -31.4011 | 4.08    |
| ligand073 | -70.1512 | -20.9154 | 3.2075  | -43.2743 | 4.5066 | -46.388  | 4.0642  |
| ligand074 | -62.1564 | -27.4713 | 3.2879  | -44.6026 | 4.4604 | -45.8852 | 4.1597  |
| ligand075 | -66.6178 | -16.0862 | 2.5156  | -23.7524 | 5.4903 | -30.2307 | 5.3905  |
| ligand076 | -73.352  | -24.7434 | 3.4098  | -52.6559 | 5.9898 | -52.8304 | 6.1145  |
| ligand077 | -72.1379 | -15.4395 | 3.4933  | -34.8188 | 4.7466 | -34.6044 | 4.3344  |
| ligand078 | -71.2988 | -20.5448 | 2.4851  | -48.7313 | 4.5789 | -50.3142 | 4.885   |
| ligand079 | -74.7449 | -4.2861  | 1.9927  | -18.6345 | 5.1533 | -38.2028 | 5.2968  |
| ligand080 | -69.6266 | -20.3876 | 3.0796  | -37.005  | 4.0648 | -40.4194 | 3.3995  |
| ligand081 | -71.8541 | -10.155  | 2.8978  | -39.2091 | 4.2042 | -42.7396 | 4.2751  |
| ligand082 | -61.3149 | -21.4644 | 6.0916  | -28.7563 | 8.969  | -31.1977 | 7.3366  |
| ligand083 | -61.3935 | -22.8342 | 3.1723  | -36.7347 | 4.2025 | -36.799  | 4.2213  |
| ligand084 | -54.1001 | -21.7002 | 2.7777  | -38.5935 | 4.8453 | -39.0048 | 4.9992  |
| ligand085 | -63.3705 | -29.9426 | 2.7667  | -45.2912 | 4.1484 | -48.5353 | 4.2302  |
| ligand086 | -64.0545 | -24.2156 | 2.9976  | -30.346  | 5.1366 | -30.1476 | 5.0653  |
| ligand087 | -74.989  | -26.7246 | 5.8932  | -55.9766 | 5.575  | -57.302  | 5.8431  |
| ligand088 | -58.0258 | -48.8511 | 15.7413 | 25.1776  | 16.886 | 33.1098  | 16.4534 |
| ligand089 | -59.8857 | -15.0144 | 3.6843  | -37.2024 | 3.9946 | -37.3566 | 3.6769  |
| ligand090 | -53.3482 | -15.0399 | 1.5427  | -26.8562 | 2.9895 | -29.2906 | 2.8895  |
| ligand091 | -62.251  | -18.6565 | 3.294   | -34.2774 | 4.5988 | -36.9122 | 4.569   |
| ligand092 | -61.1433 | -13.7639 | 1.5084  | -37.8393 | 4.695  | -53.5033 | 5.0967  |
| ligand093 | -72.4006 | -16.2236 | 3.6016  | -30.8671 | 4.8176 | -35.8352 | 4.7002  |
| ligand094 | -74.2915 | -16.7005 | 2.4095  | -35.0993 | 4.3917 | -37.2952 | 3.8732  |
| ligand095 | -67.421  | -12.4342 | 2.634   | -32.7229 | 5.0119 | -33.2093 | 5.059   |
| ligand096 | -66.6877 | -7.0567  | 2.4609  | -31.0692 | 4.9452 | -40.1109 | 4.8703  |
| ligand097 | -67.338  | -12.2543 | 2.694   | -32.696  | 4.1691 | -39.4649 | 4.3771  |
| ligand098 | -66.3009 | -13.6973 | 2.8818  | -36.9594 | 5.4517 | -39.4603 | 5.5475  |
| ligand099 | -73.9137 | -28.639  | 5.9047  | -52.8812 | 5.9472 | -54.1526 | 6.2384  |
| ligand100 | -69.3176 | -29.2891 | 3.1027  | -66.192  | 7.1816 | -67.6791 | 7.5511  |
| ligand101 | -63.5958 | -29.1653 | 3.5487  | -68.0883 | 7.2894 | -71.4269 | 7.5889  |
| ligand102 | -63.7427 | -11.2603 | 2.5027  | -22.7976 | 4.1488 | -29.3912 | 4.6508  |
| ligand103 | -69.1476 | -28.624  | 2.9599  | -47.9809 | 3.8228 | -48.5786 | 3.795   |
| ligand104 | -70.3421 | -11.8251 | 3.5317  | -35.1838 | 5.8108 | -38.7869 | 4.9355  |
| ligand105 | -66.0978 | -24.033  | 3.1064  | -36.4858 | 4.6676 | -34.7255 | 4.668   |
| ligand106 | -52.0467 | -14.1167 | 2.0194  | -25.101  | 4.9076 | -25.6999 | 5.0727  |
| ligand107 | -69.3275 | -18.4252 | 3.2323  | -36.0633 | 3.9282 | -37.7715 | 3.9803  |
| ligand108 | -70.5258 | -23.6985 | 2.6797  | -37.2627 | 3.5189 | -37.2023 | 3.5136  |
| ligand109 | -60.5565 | -21.5477 | 3.134   | -38.6805 | 5.4906 | -39.3499 | 5.6219  |
| ligand110 | -63.3425 | -20.2041 | 1.9895  | -30.324  | 3.344  | -31.9958 | 3.3254  |
| ligand111 | -67.6784 | -29.906  | 2.286   | -47.0539 | 3.8592 | -47.8452 | 3.8341  |

## Supplementary Material

|           |          |          |        |          |         |          |         |
|-----------|----------|----------|--------|----------|---------|----------|---------|
| ligand112 | -60.1187 | -10.2163 | 2.9762 | -36.9273 | 5.4028  | -42.2553 | 5.6536  |
| ligand113 | -62.8853 | -19.5689 | 2.52   | -30.2508 | 3.1567  | -31.9139 | 3.035   |
| ligand114 | -71.6795 | -28.6192 | 3.6154 | -56.0356 | 6.4963  | -56.218  | 6.3939  |
| ligand115 | -59.7622 | -6.8124  | 2.6464 | -22.5157 | 4.2368  | -25.3819 | 3.861   |
| ligand116 | -63.8882 | -33.9738 | 7.0351 | -79.3015 | 10.2641 | -78.4786 | 10.1062 |
| ligand117 | -60.7223 | -9.0439  | 3.2554 | -34.0191 | 5.1999  | -36.3873 | 5.4828  |
| ligand118 | -69.4364 | -18.2295 | 3.5843 | -38.292  | 4.4111  | -38.1003 | 4.2936  |
| ligand119 | -56.5245 | -7.8731  | 2.3415 | -32.1114 | 7.4517  | -33.8037 | 8.3832  |
| ligand120 | -67.995  | -12.768  | 3.4241 | -44.6483 | 8.7866  | -44.1768 | 9.8499  |
| ligand121 | -64.2921 | -8.2804  | 1.9319 | -39.1227 | 4.6759  | -51.5887 | 6.6691  |
| ligand122 | -76.5576 | -22.8826 | 3.7694 | -44.8286 | 5.6478  | -45.1711 | 5.4875  |
| ligand123 | -69.1113 | -23.1203 | 3.16   | -48.9916 | 3.9519  | -49.4111 | 4.0323  |
| ligand124 | -65.9615 | -18.8948 | 2.857  | -39.3575 | 5.6033  | -40.05   | 5.9657  |
| ligand125 | -76.5666 | -24.5203 | 4.1163 | -51.9835 | 5.3993  | -52.4972 | 5.3493  |
| ligand126 | -56.5204 | -7.2777  | 2.6359 | -56.5599 | 9.0302  | -65.2121 | 8.8105  |
| ligand127 | -64.728  | -31.2445 | 5.9774 | -66.4541 | 7.6364  | -65.2744 | 7.7059  |
| ligand128 | -67.2841 | -16.7413 | 3.0672 | -52.3318 | 4.2516  | -55.8131 | 4.5991  |
| ligand129 | -67.1943 | -19.5428 | 2.9915 | -46.9302 | 4.5545  | -45.9177 | 4.6874  |
| ligand130 | -66.9712 | -14.2097 | 4.0321 | -43.7212 | 6.3803  | -44.1936 | 6.0234  |
| ligand131 | -60.3751 | -9.1155  | 3.1127 | -40.8943 | 5.6906  | -45.6904 | 5.9879  |
| ligand132 | -64.461  | -5.0193  | 2.637  | -31.3036 | 9.298   | -47.2193 | 6.4498  |
| ligand133 | -63.9621 | -26.2048 | 2.5569 | -56.3991 | 6.8931  | -57.6017 | 6.7005  |
| ligand134 | -67.9829 | -24.7463 | 4.4131 | -38.5611 | 3.6222  | -40.0989 | 3.5927  |
| ligand135 | -64.9035 | -19.7942 | 4.6544 | -50.3479 | 5.412   | -56.9659 | 6.6353  |
| ligand136 | -57.0045 | -13.0777 | 2.6022 | -36.346  | 4.1241  | -37.3293 | 4.0574  |
| ligand137 | -65.1934 | -18.6995 | 2.6646 | -42.1544 | 5.7936  | -43.9162 | 6.3602  |
| ligand138 | -56.8342 | -17.0335 | 2.742  | -44.8146 | 5.1089  | -45.8231 | 4.6716  |
| ligand139 | -76.4889 | -12.7325 | 2.2731 | -68.5119 | 6.6613  | -100.827 | 7.4467  |
| ligand140 | -56.9201 | -20.371  | 3.4693 | -60.9536 | 7.1076  | -69.5429 | 6.5692  |
| ligand141 | -49      | -12.1068 | 4.1703 | -26.6619 | 6.8929  | -31.8426 | 7.318   |
| ligand142 | -57.0472 | -37.0566 | 5.0114 | -65.1737 | 5.2875  | -63.8762 | 5.6877  |
| ligand143 | -46.9285 | N.C.     | N.C.   | N.C.     | N.C.    | N.C.     | N.C.    |
| ligand144 | -48.6334 | -10.9502 | 2.5963 | -21.6979 | 2.7546  | -21.2284 | 2.8502  |
| ligand145 | -51.9493 | -7.1205  | 2.239  | -15.9609 | 3.5852  | -16.0613 | 3.4849  |
| ligand146 | -10.2191 | -19.6962 | 3.3844 | -36.2549 | 4.9628  | -40.54   | 4.2897  |
| ligand147 | -14.5807 | -28.2915 | 3.5154 | -44.9939 | 4.1649  | -44.8962 | 4.3462  |
| ligand148 | -53.3213 | -22.5554 | 4.2638 | -68.0239 | 7.1906  | -72.9698 | 6.8743  |
| ligand149 | -58.2036 | -36.8406 | 5.0799 | -55.5185 | 6.3863  | -54.8822 | 6.2557  |
| ligand150 | -72.4411 | -19.3142 | 6.1895 | -60.9761 | 7.9719  | -63.725  | 7.7509  |
| ligand151 | -49.4343 | -9.1305  | 3.3418 | -16.6417 | 5.0445  | -16.6392 | 4.9539  |

## Supplementary Material

|           |          |          |         |          |         |          |         |
|-----------|----------|----------|---------|----------|---------|----------|---------|
| ligand152 | -64.9338 | -29.6338 | 3.4272  | -26.9631 | 5.253   | -26.4733 | 5.262   |
| ligand153 | -57.8217 | -9.087   | 2.2842  | -15.6036 | 4.2127  | -15.6845 | 4.2073  |
| ligand154 | -56.66   | -6.6554  | 1.6022  | -21.7266 | 4.6302  | -22.2689 | 4.1131  |
| ligand155 | -61.1741 | -30.2082 | 2.7205  | -45.5367 | 4.088   | -46.5215 | 3.9062  |
| ligand156 | -62.4529 | -13.6365 | 2.0918  | -36.1692 | 4.9332  | -44.4106 | 4.3644  |
| ligand157 | -59.2506 | -10.3745 | 6.459   | -9.9617  | 8.0792  | -12.023  | 5.81    |
| ligand158 | -56.477  | -15.5515 | 2.2051  | -33.4026 | 3.3052  | -34.6588 | 3.0911  |
| ligand159 | -60.2864 | -11.4762 | 2.0944  | -24.1071 | 3.9311  | -26.9701 | 3.2749  |
| ligand160 | -55.9162 | -15.7798 | 3.2066  | -21.3962 | 4.546   | -20.3967 | 4.5035  |
| ligand161 | -69.1778 | -17.6637 | 3.4461  | -32.5074 | 4.2444  | -32.719  | 3.9842  |
| ligand162 | -62.8584 | -7.5076  | 2.6423  | -30.8392 | 4.2045  | -31.4079 | 4.0391  |
| ligand163 | -74.6863 | -20.0105 | 3.5525  | -35.9293 | 3.9381  | -39.5772 | 3.5231  |
| ligand164 | -68.5198 | -10.6081 | 2.6926  | -31.8494 | 5.2196  | -36.4149 | 4.2312  |
| ligand165 | -69.3835 | -7.7873  | 1.4443  | -22.7906 | 4.1279  | -26.0234 | 4.2527  |
| ligand166 | -79.9213 | -23.3806 | 3.2498  | -43.5956 | 4.6661  | -44.0722 | 4.0675  |
| ligand167 | -63.4987 | -12.3467 | 2.5337  | -24.9847 | 3.1101  | -26.0995 | 2.7733  |
| ligand168 | -61.161  | -11.7875 | 3.1649  | -27.6347 | 4.0899  | -32.9248 | 3.3656  |
| ligand169 | -71.6114 | -8.4045  | 1.6244  | -25.2788 | 3.4758  | -29.3884 | 3.4024  |
| ligand170 | -73.8066 | -21.8055 | 2.7616  | -39.7128 | 5.4858  | -41.2163 | 5.374   |
| ligand171 | -66.1157 | -12.9693 | 2.4753  | -31.5045 | 3.836   | -32.7537 | 3.586   |
| ligand172 | -73.2997 | -27.6602 | 3.0979  | -42.9055 | 5.0801  | -42.8211 | 4.8783  |
| ligand173 | -59.3466 | -32.9432 | 5.4124  | -41.5379 | 4.1534  | -41.3324 | 4.1623  |
| ligand174 | -59.0884 | -15.8529 | 4.6257  | -58.2201 | 6.8654  | -67.3315 | 6.122   |
| ligand175 | -58.0832 | -14.1565 | 8.273   | -53.2265 | 7.294   | -57.8079 | 7.0707  |
| ligand176 | -56.7691 | -5.7421  | 3.2023  | -24.9456 | 4.6225  | -30.3613 | 3.2353  |
| ligand177 | -64.2864 | -11.9484 | 3.1685  | -42.1766 | 4.4007  | -45.9982 | 4.2503  |
| ligand178 | -56.686  | -15.017  | 2.4694  | -41.9724 | 7.2444  | -44.5757 | 7.3621  |
| ligand179 | -70.3805 | -86.4797 | 15.1791 | 20.624   | 20.2479 | 12.3451  | 20.9188 |
| ligand180 | -63.7357 | -24.8028 | 3.6769  | -63.4844 | 6.6617  | -64.6399 | 6.7333  |
| ligand181 | -65.6897 | -27.7353 | 5.0037  | -50.4111 | 4.9166  | -50.0701 | 5.0057  |
| ligand182 | -70.7817 | -26.6558 | 3.622   | -53.2506 | 4.6474  | -55.3196 | 4.3552  |
| ligand183 | -52.1654 | -15.9074 | 2.18    | -26.187  | 4.5411  | -25.3141 | 4.461   |
| ligand184 | -73.2702 | -14.2175 | 2.9064  | -32.0476 | 5.1378  | -38.4055 | 5.0699  |
| ligand185 | -66.5299 | -9.9174  | 1.7475  | -14.8491 | 3.97    | -18.252  | 3.8405  |
| ligand186 | -65.9178 | -17.4811 | 3.2736  | -32.2807 | 3.8131  | -32.0233 | 3.8403  |
| ligand187 | -67.5913 | -17.2943 | 2.6486  | -38.0756 | 4.2137  | -43.3419 | 4.4929  |
| ligand188 | -62.4171 | -17.9929 | 2.7701  | -41.2233 | 4.6679  | -40.995  | 4.3511  |
| ligand189 | -64.8143 | -27.597  | 2.6044  | -46.3628 | 4.6094  | -48.147  | 4.6167  |
| ligand190 | -57.8174 | -17.1764 | 2.9616  | -31.9965 | 4.3384  | -32.2365 | 4.3962  |
| ligand191 | -79.6909 | -45.3854 | 4.7834  | -73.2374 | 6.4399  | -72.6418 | 6.3787  |

## Supplementary Material

|           |          |          |        |          |        |          |         |
|-----------|----------|----------|--------|----------|--------|----------|---------|
| ligand192 | -76.9184 | -26.4625 | 3.9667 | -68.049  | 8.4749 | -68.4567 | 8.5604  |
| ligand193 | -63.7175 | -15.7926 | 2.8261 | -21.0422 | 4.3536 | -20.0009 | 4.3312  |
| ligand194 | -69.4305 | -10.6016 | 3.2403 | -22.0617 | 4.8938 | -23.2801 | 4.5343  |
| ligand195 | -52.4214 | -17.8623 | 2.4711 | -31.9132 | 4.4115 | -46.9003 | 4.298   |
| ligand196 | -67.0166 | -16.3556 | 2.9245 | -33.1318 | 4.0738 | -33.3552 | 4.1374  |
| ligand197 | -63.8368 | -12.3658 | 2.1932 | -27.6849 | 4.1685 | -37.852  | 4.2471  |
| ligand198 | -70.1429 | -9.2924  | 1.7511 | -25.0743 | 5.3005 | -30.303  | 4.7429  |
| ligand199 | -67.911  | -14.0978 | 2.7026 | -29.9586 | 4.611  | -31.2401 | 4.4067  |
| ligand200 | -71.2903 | -5.2133  | 1.6199 | -23.6228 | 4.8858 | -34.881  | 4.5072  |
| ligand201 | -66.3658 | -12.6479 | 2.6031 | -33.0347 | 4.7207 | -34.2621 | 4.2693  |
| ligand202 | -78.1063 | -0.2868  | 1.3586 | -21.583  | 7.4511 | -35.5836 | 10.7475 |
| ligand203 | -72.5511 | -21.4578 | 4.7732 | -37.0677 | 4.2853 | -37.9755 | 4.0237  |
| ligand204 | -78.2288 | -15.115  | 2.2381 | -34.6992 | 4.1943 | -37.5877 | 3.6747  |
| ligand205 | -65.8803 | -30.2352 | 3.7222 | -48.5459 | 4.2904 | -48.5227 | 4.3093  |
| ligand206 | -52.7795 | -11.3291 | 2.9706 | -45.3391 | 4.4052 | -48.8931 | 4.7841  |
| ligand207 | -61.1463 | -30.7249 | 3.3473 | -48.5209 | 4.6675 | -48.3149 | 4.6122  |
| ligand208 | -64.8274 | -8.3539  | 2.9144 | -32.9146 | 5.3727 | -41.952  | 5.0085  |
| ligand209 | -59.6896 | -11.9288 | 3.0751 | -30.722  | 4.6888 | -31.8971 | 4.4067  |
| ligand210 | -64.9258 | -16.0349 | 2.7377 | -34.2846 | 3.7846 | -34.9809 | 3.3348  |
| ligand211 | -78.2191 | -33.5862 | 3.8649 | -55.8072 | 5.6266 | -59.6873 | 5.6433  |
| ligand212 | -63.3363 | -20.4258 | 2.5339 | -31.3596 | 3.4496 | -31.4197 | 3.3254  |
| ligand213 | -67.658  | -17.4221 | 4.4437 | -34.8158 | 5.4448 | -39.5866 | 5.0956  |
| ligand214 | -67.8352 | -27.0786 | 3.1962 | -43.7562 | 3.7698 | -43.9695 | 3.68    |
| ligand215 | -71.8944 | -14.9509 | 2.0356 | -29.961  | 4.3295 | -35.8355 | 4.2017  |
| ligand216 | -71.0029 | -15.2368 | 2.6532 | -47.3928 | 4.9339 | -46.5481 | 5.2094  |
| ligand217 | -49.0484 | -24.8872 | 2.1946 | -49.5371 | 4.5073 | -54.0958 | 4.6613  |
| ligand218 | -73.4337 | -18.8388 | 4.383  | -58.5278 | 7.086  | -61.4926 | 7.0639  |
| ligand219 | -76.0616 | -34.4062 | 7.2278 | -62.6665 | 8.6344 | -64.0896 | 8.4834  |
| ligand220 | -59.8682 | -13.2088 | 2.4606 | -32.7698 | 3.8099 | -33.7958 | 3.8603  |
| ligand221 | -50.9973 | -10.2595 | 2.7792 | -23.7119 | 4.0156 | -23.9417 | 3.604   |
| ligand222 | -66.2658 | -19.1779 | 3.1438 | -29.7821 | 3.977  | -29.3528 | 3.937   |
| ligand223 | -66.3913 | -18.3104 | 2.7729 | -35.3543 | 4.5662 | -38.5011 | 4.3178  |
| ligand224 | -53.1111 | -27.3558 | 3.79   | -36.6357 | 4.2894 | -35.9641 | 4.2303  |
| ligand225 | -68.1715 | -9.3207  | 3.4644 | -38.3778 | 5.6026 | -44.1553 | 5.1397  |
| ligand226 | -73.7332 | -22.1112 | 6.0083 | -53.4122 | 6.8822 | -54.4395 | 6.8402  |
| ligand227 | -69.1872 | -38.8824 | 4.2511 | -50.6292 | 5.1557 | -48.9817 | 5.057   |
| ligand228 | -67.6645 | -27.3932 | 3.4417 | -50.3882 | 5.2982 | -48.9396 | 5.5574  |
| ligand229 | -45.2792 | -5.7987  | 1.2075 | -13.1944 | 2.376  | -15.4716 | 2.3668  |
| ligand230 | -47.4782 | -8.2718  | 1.5317 | -17.4735 | 2.5056 | -16.7451 | 2.5322  |
| ligand231 | -56.1834 | -29.7841 | 7.2117 | -50.9637 | 5.9748 | -49.2063 | 5.9167  |

## Supplementary Material

|           |          |          |        |          |         |          |         |
|-----------|----------|----------|--------|----------|---------|----------|---------|
| ligand232 | -62.0024 | -12.2536 | 2.9517 | -19.3013 | 6.2304  | -26.2313 | 5.7779  |
| ligand233 | -41.6479 | -2.4398  | 3.1419 | -7.8506  | 4.0456  | -10.8528 | 3.5292  |
| ligand234 | -61.9861 | -7.3196  | 3.2642 | -27.1473 | 5.1984  | -30.0366 | 4.8388  |
| ligand235 | -67.1438 | -24.2393 | 3.0183 | -30.5847 | 4.3049  | -28.6157 | 4.2494  |
| ligand236 | -55.0426 | -18.3021 | 2.058  | -28.452  | 2.4795  | -28.1301 | 2.4334  |
| ligand237 | -50.6039 | -6.3402  | 2.7242 | -18.8261 | 4.6366  | -22.9171 | 3.5884  |
| ligand238 | -56.5122 | -19.5139 | 2.1545 | -31.029  | 4.4089  | -30.9747 | 4.5899  |
| ligand239 | -61.85   | -20.3771 | 3.5985 | -28.1504 | 5.2481  | -28.263  | 4.9584  |
| ligand240 | -67.8413 | -17.8098 | 2.6778 | -33.8979 | 3.5442  | -33.6432 | 3.1726  |
| ligand241 | -60.8185 | -9.2979  | 3.1233 | -67.3453 | 10.0598 | -72.534  | 10.6413 |
| ligand242 | -58.4355 | -7.3371  | 3.6354 | -58.3213 | 9.3626  | -67.7011 | 15.7357 |
| ligand243 | -73.0394 | -21.7289 | 6.3419 | -62.2075 | 7.3312  | -66.6594 | 7.2978  |
| ligand244 | -65.4135 | -25.2303 | 4.6088 | -40.7453 | 4.2898  | -41.5469 | 4.0826  |
| ligand245 | -64.753  | -11.5545 | 1.9734 | -30.1803 | 3.581   | -36.0726 | 3.715   |
| ligand246 | -70.3561 | -25.6507 | 3.0836 | -37.3777 | 3.771   | -35.2743 | 3.7071  |
| ligand247 | -66.7058 | -13.0101 | 3.1411 | -35.623  | 3.9951  | -37.9715 | 4.0286  |
| ligand248 | 37.5774  | -11.4307 | 2.3023 | -25.132  | 4.8342  | -40.1873 | 4.3243  |
| ligand249 | -52.7815 | -21.5827 | 4.4699 | -62.5546 | 7.0487  | -63.8683 | 7.2617  |
| ligand250 | -61.6842 | -20.5136 | 3.2387 | -95.5551 | 12.4896 | -101.121 | 13.1233 |
| ligand251 | -65.9348 | 103.8008 | 12.635 | -72.8589 | 11.9871 | -73.9381 | 12.4334 |
| ligand252 | -53.2369 | -6.0398  | 3.0183 | -15.7896 | 3.7859  | -15.9901 | 3.8127  |
| ligand253 | -57.5046 | -9.9986  | 2.7201 | -26.1658 | 5.0161  | -24.8348 | 5.0664  |
| ligand254 | -71.7336 | -19.4926 | 2.8564 | -29.7375 | 4.3167  | -30.9916 | 4.5644  |
| ligand255 | -47.5903 | -10.1168 | 1.8825 | -21.2272 | 2.6613  | -21.2563 | 2.6412  |
| ligand256 | -65.5988 | -24.6787 | 2.1521 | -48.6826 | 4.5285  | -50.1126 | 4.3044  |
| ligand257 | -67.3966 | -9.959   | 2.6647 | -35.4216 | 4.4822  | -38.8304 | 4.4917  |
| ligand258 | -64.6662 | -5.2236  | 3.026  | -22.9295 | 5.2196  | -27.3734 | 4.196   |
| ligand259 | -71.2242 | -9.8223  | 4.359  | -28.1771 | 4.9839  | -30.2954 | 4.5746  |
| ligand260 | -67.5952 | -17.4934 | 2.458  | -33.8081 | 4.3059  | -33.3583 | 4.0784  |
| ligand261 | -56.7369 | -22.4986 | 2.4086 | -36.714  | 3.4549  | -35.8049 | 3.3412  |
| ligand262 | -62.3209 | -9.9208  | 2.3727 | -33.6563 | 3.9156  | -36.1939 | 3.8142  |
| ligand263 | -74.6665 | -17.6997 | 3.9839 | -30.3508 | 5.9179  | -31.6088 | 5.93    |
| ligand264 | -51.1674 | -13.022  | 1.7804 | -24.1635 | 2.6538  | -23.7665 | 2.7844  |
| ligand265 | -69.216  | -8.4162  | 2.1834 | -25.1866 | 4.6197  | -33.4993 | 4.897   |
| ligand266 | -62.0138 | -22.1056 | 2.6527 | -36.919  | 3.7909  | -37.6361 | 3.7453  |
| ligand267 | -60.5265 | -8.3304  | 2.451  | -22.9541 | 4.5811  | -26.0551 | 4.756   |
| ligand268 | -65.5178 | -11.5907 | 2.3808 | -29.4463 | 3.6745  | -30.2401 | 3.8577  |
| ligand269 | -67.7307 | -9.3156  | 2.0295 | -27.3747 | 4.6634  | -28.1195 | 4.6107  |
| ligand270 | -64.0025 | -29.561  | 3.4247 | -44.1158 | 3.9226  | -43.4237 | 3.9538  |
| ligand271 | -66.2943 | -14.0015 | 2.5419 | -38.0928 | 5.0159  | -41.1508 | 5.1641  |

## Supplementary Material

|           |          |          |        |          |        |          |        |
|-----------|----------|----------|--------|----------|--------|----------|--------|
| ligand272 | -72.9021 | -20.085  | 4.2255 | -43.0557 | 6.6933 | -49.0623 | 4.9652 |
| ligand273 | -75.262  | -24.6857 | 3.3843 | -48.3715 | 4.884  | -50.6905 | 4.3362 |
| ligand274 | -54.7765 | -20.1445 | 3.0196 | -36.5747 | 5.4751 | -37.2306 | 5.6564 |
| ligand275 | -51.0784 | 0.0187   | 0.0924 | -4.4153  | 3.3157 | -11.5148 | 5.1474 |
| ligand276 | -61.6179 | -27.0928 | 4.8631 | -44.5618 | 5.5544 | -44.1019 | 5.2747 |
| ligand277 | -58.0141 | -16.9989 | 1.9488 | -28.8782 | 2.9664 | -28.7539 | 2.922  |
| ligand278 | -65.2549 | -24.357  | 2.2624 | -39.8582 | 4.0088 | -39.6743 | 4.0033 |
| ligand279 | -64.986  | -17.4562 | 1.8438 | -39.156  | 3.6617 | -39.9322 | 3.5548 |
| ligand280 | -71.5723 | -20.7795 | 2.406  | -43.7535 | 3.8199 | -46.5001 | 3.8013 |
| ligand281 | -63.8205 | -8.2884  | 3.8041 | -33.0761 | 6.0983 | -37.9731 | 5.6867 |
| ligand282 | -66.904  | -16.7402 | 3.892  | -38.7084 | 4.5678 | -40.2304 | 4.2726 |
| ligand283 | -66.9794 | -17.3479 | 3.0707 | -35.3116 | 3.6996 | -35.8087 | 3.7573 |
| ligand284 | -65.5285 | -16.1978 | 2.9965 | -39.6108 | 5.0179 | -41.4859 | 4.6822 |
| ligand285 | -59.6148 | -19.4749 | 3.302  | -30.2417 | 4.1246 | -28.8272 | 4.2594 |
| ligand286 | -66.6118 | -20.7298 | 2.771  | -35.0152 | 5.0942 | -36.8665 | 5.0523 |
| ligand287 | -58.3389 | -7.0209  | 2.3827 | -3.4698  | 5.1646 | -4.0242  | 5.1532 |
| ligand288 | -58.1056 | -11.5173 | 3.021  | -26.3345 | 5.2262 | -25.0248 | 5.296  |
| ligand289 | -52.1125 | -10.359  | 3.1771 | -25.1331 | 4.1786 | -24.6574 | 4.2377 |
| ligand290 | -75.5658 | -11.5096 | 2.388  | -31.9165 | 3.6324 | -36.2624 | 3.449  |
| ligand291 | -65.8571 | -8.7581  | 2.5322 | -17.2772 | 5.1653 | -18.6081 | 5.2783 |
| ligand292 | -61.9197 | -8.6169  | 2.2563 | -24.6929 | 3.8965 | -27.2122 | 3.6592 |
| ligand293 | -69.4092 | -8.2523  | 1.8213 | -34.0419 | 5.1961 | -37.4572 | 4.9586 |
| ligand294 | -63.8968 | -29.1151 | 3.571  | -43.1998 | 5.1687 | -42.7914 | 5.1584 |
| ligand295 | -60.1722 | -15.197  | 3.7498 | -41.6542 | 4.3942 | -40.9657 | 4.3139 |
| ligand296 | -62.8038 | -28.2386 | 2.4947 | -51.3663 | 4.3891 | -50.4928 | 4.4585 |
| ligand297 | -64.7659 | -17.9824 | 2.7595 | -31.0007 | 3.8475 | -30.5473 | 3.8476 |
| ligand298 | -60.47   | -10.5049 | 3.1635 | -25.787  | 4.0338 | -25.2671 | 4.2788 |
| ligand299 | -69.0725 | -5.5532  | 2.8948 | -22.8137 | 5.8107 | -31.4656 | 5.154  |
| ligand300 | -76.7898 | -29.9075 | 4.053  | -53.2241 | 4.7935 | -53.2526 | 4.6637 |
| ligand301 | -60.5567 | -14.2285 | 3.7859 | -3.961   | 6.694  | -7.8738  | 7.2735 |
| ligand302 | -70.1541 | -16.5722 | 3.4944 | -41.2113 | 6.9202 | -45.2286 | 6.9593 |
| ligand303 | -66.2748 | -18.4888 | 4.1093 | -28.3615 | 6.281  | -28.9153 | 6.5844 |
| ligand304 | -69.4435 | -33.1138 | 7.1626 | -57.4648 | 6.891  | -56.8426 | 6.8411 |
| ligand305 | -64.9053 | -11.8981 | 1.9806 | -31.0873 | 6.4082 | -34.863  | 7.0275 |
| ligand306 | -60.6495 | -13.9946 | 1.8012 | -31.6916 | 4.0583 | -32.3029 | 3.9266 |
| ligand307 | -54.2871 | -6.8007  | 3.0336 | -31.2401 | 4.0738 | -30.5336 | 4.3109 |
| ligand308 | -55.8451 | -20.5649 | 2.5596 | -37.1233 | 3.4419 | -36.2382 | 3.2824 |
| ligand309 | -68.0855 | -24.9277 | 2.8346 | -55.5291 | 5.9138 | -54.1895 | 5.7754 |
| ligand310 | -75.0873 | -10.4395 | 1.9972 | -45.2335 | 4.5473 | -50.2754 | 4.4444 |
| ligand311 | -55.789  | -4.8985  | 2.0201 | -19.6326 | 4.7997 | -30.7768 | 4.4561 |



## Supplementary Material

|           |          |          |         |          |         |          |         |
|-----------|----------|----------|---------|----------|---------|----------|---------|
| ligand312 | -57.2852 | -25.35   | 3.3441  | -37.3543 | 3.5457  | -37.3286 | 3.577   |
| ligand313 | -58.7577 | -8.9802  | 3.374   | -25.7246 | 4.4647  | -27.7591 | 4.2381  |
| ligand314 | -54.0899 | -13.9806 | 2.5111  | -26.793  | 3.7423  | -27.4324 | 3.6766  |
| ligand315 | -51.7472 | -11.7439 | 2.3243  | -28.5639 | 3.83    | -28.6258 | 3.8308  |
| ligand316 | -59.2056 | -18.6488 | 2.4334  | -44.104  | 6.3415  | -45.8105 | 5.9331  |
| ligand317 | -56.3668 | -5.9753  | 1.6234  | -26.1744 | 3.9437  | -28.5372 | 4.3003  |
| ligand318 | -64.9873 | -10.8563 | 3.2598  | -43.6715 | 6.0648  | -49.9985 | 6.8441  |
| ligand319 | -74.5517 | -16.2645 | 3.5203  | -40.5907 | 6.2043  | -43.6966 | 6.3042  |
| ligand320 | -55.999  | -4.207   | 3.2708  | -29.0319 | 5.5408  | -38.2602 | 3.6812  |
| ligand321 | -63.998  | -13.6483 | 2.3139  | -34.0934 | 4.0067  | -32.4125 | 3.8979  |
| ligand322 | -58.9373 | -11.3114 | 2.889   | -35.0594 | 6.546   | -38.181  | 6.277   |
| ligand323 | -58.7581 | -10.9241 | 3.8833  | -30.1117 | 6.0082  | -33.6206 | 4.8833  |
| ligand324 | -56.1102 | -5.6907  | 4.2421  | -52.1031 | 13.5464 | -71.3331 | 8.3327  |
| ligand325 | -55.7229 | -21.6087 | 4.1097  | -44.9505 | 8.1013  | -41.3592 | 8.4889  |
| ligand326 | -66.8907 | -10.2557 | 2.0974  | -39.6747 | 4.0017  | -41.1038 | 4.4695  |
| ligand327 | -64.4149 | -4.5249  | 2.4903  | -28.6113 | 4.7761  | -36.0547 | 5.8204  |
| ligand328 | -54.6613 | -15.7191 | 3.2178  | -48.8449 | 7.0187  | -48.4296 | 7.2103  |
| ligand329 | -63.8881 | -2.6829  | 2.0181  | -35.5962 | 6.1444  | -35.5358 | 6.4474  |
| ligand330 | -54.2257 | -3.1545  | 2.7323  | -20.9827 | 3.2839  | -20.7503 | 3.2375  |
| ligand331 | -63.4696 | -4.7341  | 2.183   | -36.773  | 4.665   | -39.4363 | 4.2778  |
| ligand332 | -68.6829 | -27.873  | 3.8652  | -58.8927 | 6.6633  | -65.0462 | 6.1425  |
| ligand333 | -65.9698 | -24.7386 | 3.0229  | -42.1774 | 3.688   | -43.5623 | 3.8079  |
| ligand334 | -58.8209 | -22.1502 | 4.9123  | -36.1556 | 6.9944  | -35.9968 | 6.9122  |
| ligand335 | -60.5931 | -13.7231 | 3.3026  | -28.4127 | 3.5123  | -28.313  | 3.5031  |
| ligand336 | -61.9192 | -11.622  | 2.5312  | -32.0595 | 4.4729  | -31.0893 | 4.4031  |
| ligand337 | -60.8766 | -9.6511  | 2.3327  | -27.5923 | 4.48    | -31.7476 | 4.4467  |
| ligand338 | -51.2818 | -8.553   | 2.2634  | -17.3706 | 3.636   | -16.6341 | 3.627   |
| ligand339 | -52.7848 | -16.8796 | 2.6049  | -29.9869 | 3.5629  | -30.0292 | 3.5758  |
| ligand340 | -64.2974 | -14.3361 | 3.2581  | -27.1162 | 5.5443  | -27.1263 | 5.9439  |
| ligand341 | -60.2074 | -16.782  | 10.5369 | -75.4831 | 9.5961  | -81.8063 | 9.4241  |
| ligand342 | -53.9143 | -47.4842 | 4.7652  | -39.483  | 8.3053  | -37.3081 | 8.5268  |
| ligand343 | -76.3217 | -23.0453 | 6.6743  | -68.2929 | 8.5494  | -69.2371 | 8.4281  |
| ligand344 | -64.5604 | -50.8519 | 4.8896  | -65.4924 | 5.9004  | -66.5776 | 5.8368  |
| ligand345 | -68.3236 | -25.9081 | 2.6403  | -56.2281 | 5.2856  | -56.9264 | 5.3079  |
| ligand346 | -58.0748 | -12.5035 | 4.8922  | -29.3511 | 5.216   | -29.6315 | 4.4486  |
| ligand347 | -52.2417 | -4.3327  | 1.8592  | -35.9111 | 5.2917  | -39.8118 | 5.5298  |
| ligand348 | -53.7417 | -23.4736 | 4.3009  | -98.5392 | 9.7979  | -99.7449 | 10.0455 |
| ligand349 | -63.0612 | -16.6673 | 3.2565  | -38.6696 | 4.5833  | -38.8461 | 4.5312  |
| ligand350 | -66.3393 | -14.9111 | 2.2452  | -30.2533 | 5.0285  | -31.1231 | 4.8068  |
| ligand351 | -65.35   | -11.1844 | 2.7691  | -43.1975 | 4.8598  | -42.7717 | 4.8046  |

## Supplementary Material

|           |          |          |         |          |         |          |         |
|-----------|----------|----------|---------|----------|---------|----------|---------|
| ligand352 | -70.6389 | -26.8648 | 2.7911  | -55.3605 | 5.4233  | -56.2864 | 5.5479  |
| ligand353 | -65.4946 | -11.6262 | 2.0039  | -44.1758 | 4.7991  | -45.8182 | 4.5616  |
| ligand354 | -71.043  | -13.067  | 5.4443  | -44.849  | 5.8011  | -46.3267 | 5.2757  |
| ligand355 | -63.387  | -39.2264 | 5.4962  | -63.7613 | 6.7477  | -63.1151 | 6.7854  |
| ligand356 | -55.4503 | -1.4424  | 1.4309  | -29.0961 | 3.9417  | -37.2001 | 4.6698  |
| ligand357 | -55.321  | -5.3487  | 2.7569  | -22.8581 | 4.3736  | -23.496  | 4.543   |
| ligand358 | -62.2778 | -6.5687  | 3.9763  | -25.3129 | 4.9882  | -28.4629 | 6.7403  |
| ligand359 | -57.2408 | -15.8507 | 2.8168  | -32.4959 | 4.7139  | -31.2916 | 4.6415  |
| ligand360 | -54.6363 | -1.208   | 2.4672  | -19.2632 | 5.638   | -29.3868 | 8.8432  |
| ligand361 | -73.0586 | -19.6304 | 4.5868  | -67.1423 | 7.3676  | -69.7319 | 7.2493  |
| ligand362 | -62.1403 | -16.1288 | 3.9375  | -27.5282 | 4.5035  | -30.6145 | 4.0558  |
| ligand363 | -64.4926 | -24.5796 | 3.9727  | -43.8173 | 5.8933  | -42.7916 | 5.8631  |
| ligand364 | -63.6827 | -37.6927 | 12.4792 | -54.4774 | 12.6187 | -56.3153 | 13.157  |
| ligand365 | -61.2926 | -6.4007  | 2.1634  | -22.7307 | 5.0726  | -24.597  | 5.8327  |
| ligand366 | -57.0564 | -4.3603  | 2.3966  | -22.7523 | 4.113   | -22.2965 | 4.2242  |
| ligand367 | -73.3334 | -3.2632  | 2.9369  | -30.8975 | 6.462   | -48.4011 | 5.5024  |
| ligand368 | -63.8941 | -6.1798  | 2.1596  | -37.1448 | 5.0261  | -41.9042 | 5.1627  |
| ligand369 | -65.2812 | -11.5193 | 2.6634  | -36.578  | 4.3725  | -42.7021 | 4.9441  |
| ligand370 | -64.5134 | -20.9899 | 3.189   | -57.9269 | 5.2514  | -56.8728 | 5.5752  |
| ligand371 | -63.1289 | -15.6845 | 3.1631  | -35.667  | 4.2382  | -34.9855 | 4.1412  |
| ligand372 | -63.501  | 0.2641   | 0.1225  | -13.0286 | 5.3212  | -37.845  | 6.6581  |
| ligand373 | -60.1371 | -13.6841 | 2.7507  | -33.4587 | 4.6332  | -33.3745 | 4.7589  |
| ligand374 | -52.5008 | -13.7056 | 2.1767  | -22.4217 | 2.5279  | -21.6694 | 2.5895  |
| ligand375 | -57.0217 | -11.1163 | 2.4217  | -25.5047 | 3.4339  | -26.2535 | 3.1887  |
| ligand376 | -56.4762 | -15.1563 | 2.1015  | -22.1828 | 3.5877  | -22.2335 | 3.7891  |
| ligand377 | -48.7469 | -19.8194 | 1.996   | -31.1614 | 3.9669  | -31.793  | 4.0638  |
| ligand378 | -50.7144 | -14.8588 | 5.0061  | -64.3404 | 7.1415  | -68.0877 | 7.7309  |
| ligand379 | -56.3775 | -21.5663 | 3.9882  | -127.673 | 14.7756 | -136.256 | 15.3618 |
| ligand380 | -70.5359 | -21.7666 | 4.4928  | -59.5642 | 7.4197  | -60.727  | 7.6887  |
| ligand381 | -65.0127 | -18.347  | 3.0193  | -56.79   | 5.9486  | -62.2419 | 6.2562  |
| ligand382 | -73.218  | -26.4648 | 2.8313  | -61.999  | 6.2599  | -62.3921 | 6.3662  |
| ligand383 | -76.5004 | -44.6952 | 4.5893  | -66.2489 | 6.4033  | -66.589  | 6.2577  |
| ligand384 | -72.0781 | -17.2283 | 2.2684  | -60.6778 | 6.9613  | -65.7791 | 6.9369  |
| ligand385 | -60.7493 | -28.588  | 4.0611  | -45.3032 | 5.7942  | -44.6519 | 5.775   |
| ligand386 | -53.5548 | -12.6309 | 2.7328  | -50.0792 | 5.874   | -50.5866 | 6.108   |
| ligand387 | -79.4375 | -45.6572 | 5.1625  | -97.2462 | 8.8865  | -102.84  | 10.0944 |
| ligand388 | -79.1045 | -45.2139 | 4.922   | -94.6382 | 7.6346  | -99.768  | 8.2456  |
| ligand389 | -85.3136 | -42.2538 | 6.9188  | -107.721 | 7.7293  | -115.501 | 8.5791  |
| ligand390 | -78.0745 | -60.0788 | 4.1045  | -102.899 | 8.1658  | -109.266 | 8.7324  |
| ligand391 | -74.788  | -10.3502 | 3.7951  | -46.4623 | 6.7805  | -49.1357 | 7.0496  |

## Supplementary Material

|           |          |          |        |          |        |          |        |
|-----------|----------|----------|--------|----------|--------|----------|--------|
| ligand392 | -80.4445 | -27.6107 | 3.2601 | -64.9937 | 6.7385 | -67.1763 | 7.3919 |
| ligand393 | -75.0061 | -34.0457 | 4.7151 | -68.9005 | 6.1157 | -69.1173 | 6.0322 |
| ligand394 | -65.6208 | -24.1661 | 4.9994 | -60.0259 | 6.6038 | -61.3425 | 6.4838 |
| ligand395 | -71.7042 | -14.2907 | 2.5667 | -47.232  | 6.4454 | -50.979  | 6.4414 |
| ligand396 | -60.8399 | -10.9734 | 3.7675 | -46.6585 | 6.9496 | -48.2716 | 6.4131 |
| ligand397 | -63.257  | -26.6977 | 2.8753 | -52.5873 | 5.3744 | -52.2615 | 5.5172 |
| ligand398 | -55.7034 | -20.5095 | 2.1643 | -39.5358 | 4.7792 | -40.7177 | 4.9133 |
| ligand399 | -62.4151 | -63.7323 | 6.5579 | -78.4409 | 8.7213 | -80.2673 | 9.1691 |

a Parametrization did not converge

Table S48. Rac1 VS docking scores and Nwat-MMGBSA relative binding energies (kcal/mol) computed with Nwat = 0, 30, 60 and 100 (first repetition).

| ligand    | docking score | Nwat=0     |         | Nwat=30    |         | Nwat=60    |         | Nwat=100   |         |
|-----------|---------------|------------|---------|------------|---------|------------|---------|------------|---------|
|           |               | $\Delta G$ | St.Dev. | $\Delta G$ | St.Dev. | $\Delta G$ | St.Dev. | $\Delta G$ | St.Dev. |
| ligand001 | -70.9032      | -16.7861   | 2.159   | -35.3121   | 4.5384  | -51.025    | 5.4582  | -52.8921   | 5.2351  |
| ligand002 | -68.6085      | -22.798    | 2.4288  | -33.3837   | 5.4176  | -49.691    | 5.7748  | -54.3782   | 5.8337  |
| ligand003 | -73.6353      | -19.5255   | 3.4303  | -30.5643   | 5.6973  | -44.7675   | 5.4477  | -46.6096   | 4.8032  |
| ligand004 | -66.8974      | -20.6309   | 2.381   | -32.1237   | 4.8492  | -47.4428   | 5.4059  | -49.0349   | 5.2348  |
| ligand005 | -74.8985      | -7.9133    | 2.1732  | -12.2693   | 6.1418  | -33.5268   | 6.0176  | -42.9604   | 6.1081  |
| ligand006 | -82.2695      | -14.9868   | 2.9528  | -36.0706   | 6.7108  | -60.696    | 6.4907  | -66.7269   | 5.8848  |
| ligand007 | -85.2919      | -16.7364   | 2.7997  | -27.2188   | 4.9824  | -52.884    | 5.6123  | -62.9868   | 6.046   |
| ligand008 | -76.1078      | -12.9972   | 2.9031  | -32.0255   | 7.0734  | -51.3068   | 6.9965  | -56.2674   | 6.574   |
| ligand009 | -74.341       | -23.1196   | 2.691   | -51.201    | 5.6327  | -56.6251   | 5.4816  | -55.3677   | 5.4524  |
| ligand010 | -59.8709      | -19.7235   | 1.9159  | -34.6138   | 4.0621  | -45.6112   | 3.9942  | -47.3216   | 3.7531  |
| ligand011 | -78.5888      | -18.8241   | 3.0671  | -42.4767   | 6.0673  | -50.4495   | 5.508   | -50.0837   | 5.3341  |
| ligand012 | -79.9404      | -15.1507   | 2.228   | -32.8098   | 5.6605  | -50.917    | 5.7644  | -52.4287   | 5.584   |
| ligand013 | -77.1692      | -23.904    | 2.6454  | -49.4778   | 6.0947  | -55.6905   | 6.4294  | -53.7615   | 6.1472  |
| ligand014 | -75.4356      | -15.2339   | 2.5889  | -28.4024   | 5.4652  | -47.6734   | 5.8429  | -51.6723   | 5.7643  |
| ligand015 | -86.8566      | -8.8186    | 4.1499  | -30.4238   | 12.1556 | -51.7679   | 8.4551  | -56.4969   | 6.3966  |
| ligand016 | -80.5585      | -24.3845   | 4.7753  | -40.7603   | 6.0752  | -54.808    | 5.8148  | -57.9275   | 6.1772  |
| ligand017 | -80.3863      | -16.813    | 3.0387  | -55.0108   | 6.2366  | -70.0615   | 6.0875  | -70.0898   | 6.1684  |
| ligand018 | -82.3102      | -18.2781   | 3.2035  | -54.4532   | 5.733   | -70.4783   | 6.425   | -70.1029   | 6.4221  |
| ligand019 | -78.1472      | -13.5535   | 2.6862  | -29.7531   | 5.3059  | -44.8723   | 5.398   | -48.0636   | 5.2732  |
| ligand020 | -77.1408      | -25.8711   | 3.835   | -47.7556   | 5.4276  | -60.6193   | 5.6859  | -62.4492   | 5.5559  |
| ligand021 | -77.5195      | -5.6319    | 2.2384  | -7.3174    | 7.444   | -38.3688   | 6.5538  | -50.4814   | 6.6124  |
| ligand022 | -78.1927      | -17.7837   | 3.0537  | -35.4869   | 5.9709  | -49.524    | 5.8745  | -52.1914   | 6.0961  |
| ligand023 | -76.952       | -10.1783   | 2.8487  | -25.6111   | 5.7879  | -45.9575   | 5.9838  | -49.9963   | 5.823   |
| ligand024 | -71.5927      | -20.9015   | 2.817   | -44.1086   | 5.1775  | -54.2428   | 4.8606  | -53.4835   | 4.7177  |
| ligand025 | -58.7667      | -18.8484   | 2.1903  | -29.5764   | 5.8897  | -50.0663   | 6.269   | -54.4338   | 5.9496  |
| ligand026 | -71.724       | -4.6164    | 2.4766  | -35.9849   | 6.1422  | -57.2672   | 5.1532  | -61.1041   | 5.2195  |
| ligand027 | -78.271       | -18.6383   | 4.4827  | -36.4723   | 8.5713  | -47.0774   | 6.8757  | -47.8888   | 6.776   |
| ligand028 | -77.252       | -25.1811   | 3.2861  | -48.2018   | 6.2145  | -57.3874   | 5.9733  | -57.6143   | 5.8108  |
| ligand029 | -79.4969      | -10.7675   | 2.4121  | -17.5849   | 6.6356  | -44.6296   | 6.2954  | -52.4798   | 5.3508  |
| ligand030 | -59.9182      | -7.2966    | 2.0333  | -36.0767   | 4.3536  | -46.9486   | 4.9863  | -47.2257   | 4.9751  |
| ligand031 | -68.2406      | -13.2147   | 2.3692  | -25.2432   | 4.1484  | -40.0907   | 4.6858  | -42.3526   | 4.5082  |
| ligand032 | -78.313       | -13.1252   | 2.448   | -27.9275   | 5.5843  | -55.5495   | 6.21    | -65.5317   | 6.4648  |
| ligand033 | -84.2444      | -16.3955   | 3.0921  | -26.6268   | 5.6403  | -56.8202   | 6.8189  | -69.9251   | 7.5908  |
| ligand034 | -76.2475      | -14.8664   | 5.4206  | -33.6515   | 8.8151  | -47.5249   | 5.8298  | -49.0519   | 6.0655  |
| ligand035 | -74.8863      | -18.4977   | 2.0893  | -50.1061   | 5.593   | -58.4376   | 5.4821  | -58.0465   | 5.3094  |
| ligand036 | -67.131       | -19.5766   | 3.3175  | -33.9753   | 7.1526  | -59.6972   | 7.3355  | -69.7869   | 7.2186  |

## Supplementary Material

|           |          |          |        |          |         |          |        |          |         |
|-----------|----------|----------|--------|----------|---------|----------|--------|----------|---------|
| ligand037 | -80.4996 | -12.3742 | 3.0443 | -25.6271 | 5.0507  | -53.1629 | 6.1402 | -63.7282 | 6.8381  |
| ligand038 | -86.0783 | -23.5176 | 2.32   | -33.7419 | 4.992   | -55.6932 | 5.4909 | -62.6186 | 5.441   |
| ligand039 | -71.1128 | -23.4675 | 2.8604 | -31.545  | 5.3561  | -55.066  | 6.227  | -63.1345 | 5.8452  |
| ligand040 | -72.6537 | -16.755  | 2.5895 | -42.6709 | 5.0516  | -49.7677 | 5.1883 | -48.6558 | 5.0673  |
| ligand041 | -73.2428 | -5.1491  | 2.8288 | -10.7172 | 7.9912  | -40.2811 | 7.2342 | -54.619  | 6.1954  |
| ligand042 | -59.8028 | -18.4623 | 1.8793 | -38.5688 | 4.3004  | -45.2187 | 4.3525 | -44.4901 | 4.3157  |
| ligand043 | -67.3992 | -20.0825 | 2.2303 | -37.3053 | 5.4458  | -45.985  | 5.2793 | -46.0726 | 5.2756  |
| ligand044 | -78.4218 | -17.2964 | 2.2732 | -27.9102 | 5.8596  | -51.3865 | 7.0684 | -56.5368 | 6.6957  |
| ligand045 | -87.6807 | -23.1379 | 2.6033 | -53.5875 | 4.5808  | -60.9932 | 4.8899 | -59.8595 | 4.6343  |
| ligand046 | -85.9399 | -20.0761 | 3.0666 | -32.5671 | 5.3701  | -56.5264 | 5.7155 | -64.2568 | 5.7297  |
| ligand047 | -64.7174 | -15.4593 | 2.2339 | -38.3939 | 4.8768  | -49.5439 | 5.5979 | -49.6116 | 5.231   |
| ligand048 | -76.0615 | -16.3126 | 2.211  | -58.3798 | 7.0352  | -65.3079 | 6.2494 | -62.0689 | 5.8943  |
| ligand049 | -83.3634 | -18.0639 | 3.4808 | -42.0594 | 6.8409  | -61.9819 | 6.4817 | -66.3983 | 6.5711  |
| ligand050 | -65.4325 | -17.7329 | 2.1141 | -24.8396 | 3.6349  | -30.4532 | 3.7924 | -30.3697 | 3.7347  |
| ligand051 | -81.9793 | -8.8107  | 3.3829 | -24.7577 | 10.1568 | -49.8248 | 7.2233 | -58.0142 | 5.9937  |
| ligand052 | -65.3774 | -35.3989 | 2.5201 | -48.5615 | 3.8777  | -50.339  | 3.9644 | -49.8638 | 3.9195  |
| ligand053 | -80.5658 | -23.9034 | 3.9454 | -41.3435 | 5.7586  | -49.6053 | 5.0999 | -49.2042 | 4.8462  |
| ligand054 | -76.4759 | -12.9716 | 2.6724 | -27.9374 | 8.1414  | -53.3449 | 7.5468 | -60.8836 | 6.401   |
| ligand055 | -82.3823 | -17.8391 | 2.5925 | -30.0138 | 4.1753  | -55.6083 | 4.6691 | -64.7098 | 5.2322  |
| ligand056 | -78.5623 | -19.6254 | 3.0458 | -44.4997 | 6.8934  | -51.0732 | 6.9562 | -50.2452 | 6.7149  |
| ligand057 | -75.3924 | -24.5348 | 2.8673 | -49.3885 | 5.4968  | -57.0191 | 6.0683 | -55.9724 | 5.9685  |
| ligand058 | -66.0557 | -16.0076 | 2.3814 | -17.6481 | 6.334   | -21.9835 | 6.189  | -21.9956 | 6.2902  |
| ligand059 | -61.9034 | -7.674   | 1.7998 | -19.5014 | 4.3732  | -29.1693 | 4.816  | -28.9579 | 4.5788  |
| ligand060 | -70.9228 | -22.44   | 1.9876 | -35.4588 | 5.4642  | -61.7499 | 5.6814 | -70.6112 | 5.6745  |
| ligand061 | -80.3016 | -19.7122 | 2.3876 | -34.0865 | 5.8896  | -38.8027 | 6.0313 | -37.8202 | 6.3285  |
| ligand062 | -80.1137 | -12.4737 | 3.0543 | -23.7625 | 8.2993  | -35.5053 | 8.497  | -42.7735 | 8.6611  |
| ligand063 | -80.0282 | -16.4716 | 2.1885 | -31.3604 | 5.2065  | -52.3737 | 5.1457 | -55.6194 | 5.1442  |
| ligand064 | -76.69   | -8.6403  | 2.0914 | -31.2025 | 5.4207  | -57.0011 | 5.5124 | -66.0138 | 5.5282  |
| ligand065 | -84.6903 | -12.5478 | 2.1669 | -37.7792 | 5.6184  | -60.1444 | 6.5679 | -65.6239 | 6.3329  |
| ligand066 | -63.9172 | -2.2814  | 3.2736 | -3.8459  | 8.5021  | -22.6243 | 8.8677 | -27.629  | 10.7829 |
| ligand067 | -85.1407 | -12.9352 | 2.8442 | -26.9605 | 6.7996  | -54.3503 | 6.6182 | -64.3633 | 6.6415  |
| ligand068 | -77.5486 | -10.1431 | 4.3283 | -23.3275 | 10.159  | -46.0265 | 7.0597 | -52.0543 | 6.1206  |
| ligand069 | -76.4347 | -18.2365 | 4.3939 | -40.5557 | 8.2837  | -51.6863 | 7.1962 | -51.7846 | 6.6768  |
| ligand070 | -81.0141 | -18.0631 | 3.2378 | -33.9491 | 7.6172  | -55.5339 | 6.448  | -62.6616 | 6.64    |
| ligand071 | -79.7143 | -7.0201  | 1.4271 | -36.9854 | 5.9392  | -60.3852 | 6.6016 | -63.3807 | 6.2384  |
| ligand072 | -79.6122 | -15.3551 | 3.8321 | -31.798  | 7.3192  | -47.7902 | 6.3473 | -48.8494 | 6.0677  |
| ligand073 | -86.3879 | -20.5102 | 2.3899 | -39.6359 | 5.1618  | -65.5774 | 5.4476 | -72.0192 | 4.8266  |
| ligand074 | -76.5506 | -21.0447 | 3.3217 | -46.2898 | 5.2549  | -52.9453 | 5.7678 | -51.9813 | 5.5898  |
| ligand075 | -88.6695 | -34.6829 | 2.7684 | -43.8029 | 5.2939  | -64.7811 | 6.1658 | -70.9574 | 5.9608  |
| ligand076 | -80.213  | -12.4571 | 2.0881 | -35.5557 | 4.0329  | -56.5618 | 5.5791 | -62.7194 | 5.5227  |

## Supplementary Material

|           |          |          |        |          |        |          |        |          |         |
|-----------|----------|----------|--------|----------|--------|----------|--------|----------|---------|
| ligand077 | -85.5187 | -16.9905 | 2.9692 | -25.7445 | 6.8067 | -52.4561 | 6.8299 | -62.4542 | 6.3404  |
| ligand078 | -86.2436 | -22.7639 | 3.3355 | -36.1062 | 8.9524 | -61.8366 | 7.0361 | -70.6602 | 5.7378  |
| ligand079 | -82.2538 | -17.6786 | 2.3446 | -44.8061 | 5.4118 | -59.4773 | 4.8591 | -60.3025 | 4.7826  |
| ligand080 | -82.907  | -19.7019 | 2.1942 | -30.7882 | 5.3414 | -57.0559 | 6.1053 | -66.1387 | 5.7459  |
| ligand081 | -72.7086 | -8.3678  | 2.1493 | -16.2522 | 5.2225 | -41.2793 | 6.5141 | -50.6091 | 6.6216  |
| ligand082 | -83.5276 | -21.8981 | 3.0503 | -44.2809 | 5.816  | -63.095  | 5.8519 | -65.8324 | 5.6961  |
| ligand083 | -87.1491 | -11.5224 | 4.7446 | -19.3781 | 9.1431 | -51.232  | 8.8608 | -69.5191 | 7.415   |
| ligand084 | -68.3562 | -20.1321 | 1.9263 | -36.5847 | 4.8822 | -49.3321 | 4.7854 | -50.4154 | 4.69    |
| ligand085 | -84.4718 | -18.5808 | 3.0823 | -28.4504 | 6.0227 | -58.6266 | 6.032  | -71.0228 | 6.059   |
| ligand086 | -82.5432 | -19.0454 | 3.7363 | -38.8044 | 7.2078 | -62.8619 | 6.9867 | -71.4379 | 6.7395  |
| ligand087 | -83.354  | -16.2115 | 3.1638 | -28.3765 | 6.0673 | -53.1287 | 6.1845 | -57.4479 | 6.1442  |
| ligand088 | -79.9494 | -16.571  | 2.6315 | -33.8348 | 5.5078 | -53.4933 | 5.5521 | -57.462  | 5.394   |
| ligand089 | -66.4971 | -16.6927 | 2.4018 | -28.9907 | 4.04   | -45.3132 | 5.4096 | -48.6503 | 5.2368  |
| ligand090 | -82.9494 | -22.655  | 2.4041 | -42.4564 | 5.355  | -63.2838 | 5.7272 | -68.1936 | 5.1565  |
| ligand091 | -82.4893 | -13.0205 | 2.47   | -35.6218 | 5.5068 | -52.661  | 5.1144 | -58.0612 | 5.1743  |
| ligand092 | -82.2442 | -17.9086 | 2.9474 | -30.5403 | 6.1095 | -55.1038 | 5.4276 | -62.5091 | 5.1217  |
| ligand093 | -84.3961 | -20.9723 | 3.6783 | -38.1594 | 6.3033 | -57.7235 | 5.9744 | -62.0776 | 5.8839  |
| ligand094 | -80.93   | -9.2792  | 3.8928 | -20.0987 | 8.4156 | -52.3323 | 8.0872 | -67.7386 | 6.8928  |
| ligand095 | -87.1825 | -4.8414  | 3.2809 | -4.8522  | 7.7278 | -36.7329 | 9.9477 | -59.3312 | 13.8793 |
| ligand096 | -80.9316 | -10.2437 | 1.9524 | -21.387  | 4.7956 | -51.1645 | 5.8371 | -65.9551 | 6.2056  |
| ligand097 | -85.1169 | -21.288  | 2.2931 | -31.9072 | 4.8    | -55.9618 | 5.6582 | -63.7756 | 5.7094  |
| ligand098 | -74.6567 | -7.3935  | 1.5631 | -22.8501 | 5.8822 | -51.9095 | 6.1884 | -63.8433 | 6.0702  |
| ligand099 | -84.713  | -15.9757 | 4.2257 | -34.9402 | 5.1317 | -57.2401 | 5.6985 | -63.8415 | 5.959   |
| ligand100 | -85.1886 | -8.4963  | 3.0276 | -14.6308 | 6.2594 | -47.6482 | 6.4364 | -67.5464 | 6.6901  |
| ligand101 | -73.0467 | -17.8754 | 2.7657 | -34.7918 | 5.9239 | -49.2194 | 6.023  | -51.5087 | 5.5222  |
| ligand102 | -84.518  | -5.6305  | 2.7484 | -10.3241 | 7.6046 | -44.0061 | 8.5133 | -65.3874 | 7.2265  |
| ligand103 | -80.4568 | -24.5697 | 2.9595 | -46.6315 | 5.1162 | -61.7244 | 5.6405 | -63.5791 | 5.3486  |
| ligand104 | -79.9853 | -14.8368 | 3.105  | -28.6011 | 5.7403 | -51.8436 | 6.223  | -60.2848 | 5.7574  |
| ligand105 | -81.6498 | -23.8925 | 2.6177 | -41.0397 | 5.7884 | -66.0469 | 5.6515 | -72.3874 | 5.729   |
| ligand106 | -72.686  | -18.863  | 2.4656 | -41.7871 | 5.5723 | -60.9632 | 5.5701 | -64.6729 | 5.1971  |
| ligand107 | -74.792  | -13.8595 | 2.7475 | -27.395  | 6.1497 | -48.6382 | 6.4187 | -54.5552 | 6.2831  |
| ligand108 | -78.6972 | -33.5019 | 2.6908 | -58.8626 | 4.6966 | -73.3789 | 4.9729 | -75.0422 | 4.8748  |
| ligand109 | -74.727  | -23.5378 | 2.4414 | -51.4493 | 5.1511 | -65.293  | 5.7761 | -65.684  | 6.0037  |
| ligand110 | -76.6817 | -16.2197 | 2.7469 | -35.4929 | 6.3335 | -60.0215 | 6.2406 | -66.9608 | 5.8329  |
| ligand111 | -84.5358 | -16.6399 | 2.9078 | -27.1227 | 4.8129 | -55.3079 | 5.8054 | -66.7008 | 6.0685  |
| ligand112 | -85.8043 | -21.381  | 3.9205 | -34.0971 | 7.4765 | -61.8652 | 6.3901 | -72.1618 | 6.8375  |
| ligand113 | -81.3142 | -27.0539 | 2.3181 | -45.228  | 4.4739 | -62.2657 | 5.0952 | -65.0308 | 4.9825  |
| ligand114 | -81.7906 | -20.4966 | 2.628  | -32.5706 | 4.7691 | -58.9721 | 5.9877 | -67.4163 | 6.2195  |
| ligand115 | -82.2553 | -11.5615 | 2.3797 | -30.8472 | 6.1405 | -58.0346 | 6.0148 | -65.9788 | 5.4411  |
| ligand116 | -80.2063 | -17.6169 | 4.3897 | -32.9526 | 6.3418 | -57.9787 | 6.8161 | -66.1752 | 7.0372  |

Table S49. Rac1 VS docking scores and Nwat-MMGBSA relative binding energies (kcal/mol) computed with Nwat = 0, 30, 60 and 100 (second repetition).

|           |               | Nwat=0     |         | Nwat=30    |         | Nwat=60    |         | Nwat=100   |         |
|-----------|---------------|------------|---------|------------|---------|------------|---------|------------|---------|
| ligand    | docking score | $\Delta G$ | St.Dev. | $\Delta G$ | St.Dev. | $\Delta G$ | St.Dev. | $\Delta G$ | St.Dev. |
| ligand001 | -71.9322      | -15.0326   | 2.3222  | -30.2597   | 6.4555  | -49.1025   | 6.1018  | -52.2385   | 5.3757  |
| ligand002 | -68.5546      | -18.9163   | 3.6003  | -30.0576   | 6.3078  | -47.2303   | 6.0987  | -52.898    | 6.1428  |
| ligand003 | -73.6737      | -23.8343   | 2.1787  | -35.2004   | 3.737   | -45.6537   | 4.3695  | -46.5433   | 4.2059  |
| ligand004 | -67.0682      | -10.8654   | 2.8266  | -21.2069   | 8.3283  | -43.4973   | 7.0247  | -50.9764   | 5.7763  |
| ligand005 | -75.0559      | -16.3203   | 2.3126  | -31.8823   | 4.6817  | -45.8841   | 5.2763  | -47.9215   | 5.2191  |
| ligand006 | -82.2897      | -1.9392    | 2.7091  | 1.5749     | 9.4359  | -32.0914   | 9.1088  | -58.2304   | 7.7801  |
| ligand007 | -85.0969      | -11.754    | 3.0182  | -25.6862   | 7.363   | -55.0152   | 7.8219  | -67.2387   | 6.6025  |
| ligand008 | -83.3316      | -22.5206   | 2.6246  | -39.3275   | 5.8254  | -55.6215   | 6.4901  | -57.2018   | 6.4279  |
| ligand009 | -77.8068      | -14.8782   | 5.3336  | -32.7486   | 12.0523 | -50.2617   | 6.3761  | -53.1795   | 6.653   |
| ligand010 | -62.2758      | -13.0872   | 2.5521  | -20.7678   | 5.2488  | -38.5052   | 5.6946  | -44.7402   | 5.5886  |
| ligand011 | -78.6115      | -13.3851   | 2.256   | -31.5908   | 5.3744  | -49.1774   | 5.7833  | -50.6219   | 5.8111  |
| ligand012 | -79.9309      | -15.3878   | 2.2794  | -33.2079   | 5.1617  | -51.1775   | 6.0533  | -52.3625   | 5.8641  |
| ligand013 | -75.4044      | -25.3551   | 3.1751  | -52.5168   | 6.2887  | -57.5898   | 6.2302  | -56.0857   | 5.9361  |
| ligand014 | -75.6156      | -17.1264   | 4.3564  | -34.5661   | 6.0115  | -49.4857   | 5.1031  | -52.878    | 5.1603  |
| ligand015 | -87.0753      | -5.6623    | 2.6686  | -25.1275   | 8.7824  | -47.2845   | 8.4163  | -52.2093   | 8.9219  |
| ligand016 | -80.5604      | -18.2615   | 2.9329  | -33.8603   | 5.9892  | -53.8015   | 5.6672  | -60.8379   | 5.6039  |
| ligand017 | -81.1617      | -27.6803   | 5.4885  | -61.1388   | 5.4895  | -64.4113   | 4.6721  | -61.6128   | 4.7949  |
| ligand018 | -77.9454      | -9.4816    | 2.0155  | -42.0257   | 6.5665  | -68.5629   | 6.2557  | -73.3353   | 6.1551  |
| ligand019 | -78.1496      | -9.7313    | 3.9401  | -22.901    | 7.3676  | -43.022    | 6.3261  | -48.5595   | 5.8599  |
| ligand020 | -76.9891      | -24.0063   | 2.5641  | -40.2221   | 5.7425  | -58.3374   | 5.748   | -61.5011   | 5.6091  |
| ligand021 | -77.5787      | -11.9789   | 2.2333  | -22.5702   | 5.6776  | -46.1499   | 6.0265  | -52.0801   | 6.0023  |
| ligand022 | -78.178       | -20.6626   | 3.6457  | -42.309    | 5.6966  | -48.2577   | 5.382   | -47.8544   | 5.308   |
| ligand023 | -76.9999      | -16.0022   | 3.7117  | -35.8899   | 8.4698  | -46.3856   | 6.1164  | -46.9747   | 5.7265  |
| ligand024 | -59.6886      | -0.0641    | 1.4862  | 5.6507     | 7.2309  | -24.1604   | 7.9338  | -40.5636   | 12.4825 |
| ligand025 | -63.9452      | -19.8324   | 3.1111  | -37.8288   | 5.4218  | -55.1285   | 5.6267  | -57.8606   | 5.6171  |
| ligand026 | -72.3488      | -12.3289   | 3.3383  | -49.6844   | 5.2225  | -63.4601   | 5.8865  | -63.3837   | 5.653   |
| ligand027 | -78.2312      | -19.9284   | 4.6565  | -38.6592   | 7.615   | -47.5723   | 5.4055  | -48.3132   | 5.3181  |
| ligand028 | -79.5983      | -18.2217   | 2.8935  | -34.4725   | 5.2853  | -53.0888   | 5.8118  | -56.5034   | 5.8737  |
| ligand029 | -79.8273      | -20.4498   | 3.3475  | -44.4186   | 6.863   | -52.1655   | 6.7333  | -51.7163   | 6.7455  |
| ligand030 | -60.5127      | -10.3786   | 2.0458  | -40.2977   | 5.4424  | -55.6276   | 5.8446  | -54.9573   | 5.5609  |
| ligand031 | -67.4659      | -14.4139   | 2.2753  | -37.4256   | 4.7644  | -44.1027   | 4.7432  | -43.4164   | 4.7218  |
| ligand032 | -79.2082      | -9.9946    | 3.7198  | -16.8689   | 9.7307  | -48.1526   | 8.3515  | -64.0299   | 6.3783  |
| ligand033 | -83.6017      | -20.8901   | 2.7756  | -33.5316   | 6.0014  | -56.9073   | 6.4388  | -64.2956   | 6.4244  |
| ligand034 | -78.0663      | -18.4555   | 2.7401  | -35.2987   | 5.2576  | -51.1445   | 6.1244  | -53.2767   | 6.1831  |
| ligand035 | -74.755       | -18.7763   | 2.5347  | -49.4744   | 5.7858  | -57.7868   | 5.7773  | -57.4659   | 5.6761  |

## Supplementary Material

|           |          |          |        |          |        |          |         |          |        |
|-----------|----------|----------|--------|----------|--------|----------|---------|----------|--------|
| ligand036 | -67.1964 | -17.7967 | 2.1291 | -33.6478 | 6.2941 | -60.5621 | 6.9248  | -70.2359 | 6.8248 |
| ligand037 | -79.4238 | -18.5535 | 2.4638 | -23.9346 | 5.677  | -55.2616 | 5.9162  | -70.7494 | 5.9468 |
| ligand038 | -82.9556 | -13.5696 | 1.8464 | -29.7812 | 5.1121 | -47.6705 | 5.7575  | -52.1525 | 5.7792 |
| ligand039 | -72.4193 | -17.5356 | 2.5066 | -27.344  | 5.4882 | -53.6856 | 5.3338  | -64.9512 | 5.3738 |
| ligand040 | -72.6611 | -23.6418 | 2.7814 | -43.0047 | 4.121  | -46.9032 | 4.1964  | -46.1341 | 4.0906 |
| ligand041 | -70.3186 | -23.4299 | 2.8576 | -45.74   | 5.9143 | -52.9178 | 5.9606  | -51.8977 | 5.9332 |
| ligand042 | -59.7994 | -17.7246 | 2.1429 | -36.8812 | 4.3399 | -43.8939 | 4.3741  | -43.2932 | 4.2302 |
| ligand043 | -69.5319 | -11.55   | 2.251  | -24.3308 | 5.7598 | -44.4278 | 5.4948  | -48.8253 | 5.4422 |
| ligand044 | -78.4474 | -14.8181 | 2.2893 | -30.7898 | 5.321  | -49.2906 | 5.178   | -51.1898 | 5.1613 |
| ligand045 | -87.5721 | -22.0534 | 2.624  | -54.2267 | 5.3721 | -63.7324 | 5.1274  | -62.8144 | 5.0677 |
| ligand046 | -86.0692 | -24.7765 | 2.7622 | -45.4355 | 5.1662 | -66.9777 | 5.9022  | -71.9311 | 6.2818 |
| ligand047 | -63.1531 | -14.9356 | 2.5971 | -36.7657 | 5.3314 | -48.1249 | 5.4927  | -48.0623 | 5.4074 |
| ligand048 | -76.805  | -10.777  | 1.71   | -48.776  | 6.2667 | -65.0656 | 6.0918  | -64.0139 | 5.7808 |
| ligand049 | -83.3338 | -22.6218 | 4.5785 | -40.5445 | 7.1213 | -59.0342 | 6.7169  | -62.5105 | 5.878  |
| ligand050 | -65.4171 | -17.819  | 2.3364 | -25.1851 | 3.3387 | -30.7749 | 3.6662  | -30.6179 | 3.5623 |
| ligand051 | -81.8759 | -8.238   | 2.0476 | -18.6065 | 7.2203 | -43.7749 | 7.0961  | -51.6269 | 6.9335 |
| ligand052 | -65.4182 | -35.0117 | 2.9488 | -47.8685 | 4.1117 | -50.4912 | 4.212   | -49.8793 | 4.0441 |
| ligand053 | -79.5331 | -23.2892 | 2.6282 | -40.8366 | 4.7059 | -50.6339 | 5.337   | -51.0567 | 5.0451 |
| ligand054 | -75.8879 | -31.7325 | 2.9338 | -52.9504 | 4.8205 | -59.6802 | 4.9287  | -58.6698 | 5.0183 |
| ligand055 | -82.3813 | -19.5223 | 2.0414 | -33.663  | 5.0776 | -56.6963 | 5.3439  | -63.5517 | 5.4794 |
| ligand056 | -78.6128 | -13.9868 | 2.7081 | -32.9252 | 5.6971 | -49.1799 | 6.3067  | -51.6203 | 6.3303 |
| ligand057 | -75.6098 | -24.7005 | 2.9292 | -50.3666 | 5.2348 | -57.7883 | 5.5222  | -56.9241 | 5.481  |
| ligand058 | -70.7339 | -18.3746 | 2.2056 | -15.1295 | 4.8191 | -21.0627 | 5.0638  | -21.6693 | 5.1021 |
| ligand059 | -61.8931 | -13.9479 | 2.3501 | -26.6166 | 3.9484 | -30.1869 | 3.7456  | -28.8039 | 3.4866 |
| ligand060 | -70.964  | -22.7008 | 1.9176 | -34.9957 | 4.8172 | -61.2113 | 5.7683  | -70.9429 | 5.6761 |
| ligand061 | -86.577  | -23.8956 | 2.2683 | -41.0254 | 5.2915 | -56.5733 | 5.3997  | -57.3192 | 5.4522 |
| ligand062 | -81.5952 | -15.4425 | 2.2562 | -26.4967 | 7.3091 | -49.8185 | 6.4564  | -57.3725 | 6.2805 |
| ligand063 | -79.9879 | -17.7579 | 2.5904 | -33.764  | 5.5107 | -53.4873 | 6.1698  | -57.3867 | 6.3714 |
| ligand064 | -76.6876 | 0.0072   | 0.0161 | -15.0444 | 7.4726 | -34.1808 | 12.7844 | -39.3638 | 16.646 |
| ligand065 | -84.443  | -10.3887 | 3.0057 | -27.1722 | 6.4272 | -57.419  | 7.3034  | -67.5169 | 7.2247 |
| ligand066 | -64.0004 | -12.7588 | 2.4077 | -30.793  | 4.2483 | -39.491  | 4.4233  | -38.7284 | 4.3449 |
| ligand067 | -85.3518 | -22.851  | 2.7182 | -36.6661 | 6.1468 | -61.5149 | 5.6945  | -70.5101 | 6.1478 |
| ligand068 | -76.4181 | -6.5873  | 3.2371 | -20.0811 | 6.6785 | -43.8711 | 6.6671  | -49.4796 | 6.2507 |
| ligand069 | -77.5264 | -6.6955  | 4.0647 | -15.7892 | 7.3641 | -42.0689 | 6.1644  | -49.7959 | 5.5845 |
| ligand070 | -80.9963 | -19.7821 | 2.5796 | -39.3528 | 6.4742 | -55.985  | 6.7014  | -60.0271 | 6.1644 |
| ligand071 | -86.8569 | -15.2689 | 2.0818 | -52.2663 | 6.2516 | -69.2299 | 5.8085  | -69.0699 | 5.8633 |
| ligand072 | -79.6695 | -16.7766 | 2.4083 | -32.5509 | 5.7767 | -47.0361 | 5.8549  | -47.3515 | 5.5828 |
| ligand073 | -86.3542 | -19.8194 | 2.8981 | -28.3235 | 6.2796 | -58.9141 | 6.6895  | -72.4128 | 6.3456 |
| ligand074 | -76.5747 | -13.8516 | 2.4624 | -34.454  | 5.182  | -51.3952 | 5.7894  | -52.8701 | 5.7043 |
| ligand075 | -92.0141 | -24.9819 | 2.6848 | -30.4594 | 6.2977 | -57.18   | 6.3009  | -67.8044 | 6.2168 |



## Supplementary Material

|           |          |          |        |          |        |          |        |          |        |
|-----------|----------|----------|--------|----------|--------|----------|--------|----------|--------|
| ligand076 | -80.313  | -22.1578 | 2.3488 | -43.6429 | 5.4574 | -62.7023 | 6.2354 | -66.8322 | 5.9057 |
| ligand077 | -85.828  | -23.0428 | 3.5141 | -37.0994 | 5.9836 | -58.847  | 6.7426 | -64.7498 | 6.871  |
| ligand078 | -86.3394 | -17.309  | 4.31   | -28.1237 | 6.8273 | -54.7876 | 6.4477 | -64.8839 | 6.4433 |
| ligand079 | -82.3065 | -12.6833 | 3.1318 | -32.7643 | 6.9316 | -55.8393 | 6.5769 | -61.3812 | 6.3936 |
| ligand080 | -82.8357 | -19.8749 | 2.4592 | -34.4049 | 5.5125 | -59.9736 | 6.2109 | -67.9591 | 6.1029 |
| ligand081 | -72.5936 | -10.5844 | 2.6478 | -26.0327 | 6.0187 | -47.0422 | 6.4881 | -53.7806 | 6.4743 |
| ligand082 | -83.3447 | -16.127  | 4.6562 | -37.0322 | 6.3362 | -58.9243 | 6.0806 | -64.0199 | 5.613  |
| ligand083 | -86.9932 | -24.3581 | 2.1337 | -43.1941 | 4.8019 | -66.1605 | 5.3199 | -71.948  | 5.6274 |
| ligand084 | -68.3478 | -18.587  | 1.9019 | -33.142  | 4.4922 | -48.297  | 5.0759 | -51.1278 | 4.75   |
| ligand085 | -84.6206 | -21.3382 | 3.4991 | -33.2036 | 6.1181 | -58.5105 | 5.8617 | -66.715  | 6.1325 |
| ligand086 | -82.6194 | -20.1397 | 2.137  | -31.852  | 5.0817 | -57.2756 | 5.9577 | -66.1608 | 6.2663 |
| ligand087 | -76.341  | -17.3144 | 2.4061 | -34.5311 | 5.1594 | -53.5819 | 5.6585 | -57.1872 | 5.7866 |
| ligand088 | -79.9222 | -15.8599 | 2.6234 | -34.9414 | 4.8247 | -55.5782 | 5.5751 | -58.8993 | 5.5579 |
| ligand089 | -69.9927 | -6.3442  | 2.0805 | -9.922   | 5.476  | -34.2691 | 5.9566 | -43.8882 | 6.235  |
| ligand090 | -83.0355 | -19.8539 | 4.0146 | -32.079  | 6.0157 | -60.9237 | 6.2303 | -72.5354 | 5.848  |
| ligand091 | -82.371  | -11.9711 | 2.8463 | -22.6651 | 5.5921 | -48.2084 | 5.7104 | -61.2082 | 6.4157 |
| ligand092 | -82.2442 | -17.6885 | 3.1784 | -27.3423 | 6.451  | -58.0317 | 6.7358 | -72.3807 | 7.1136 |
| ligand093 | -84.4685 | -23.1054 | 3.0568 | -44.8101 | 5.9826 | -62.8786 | 5.6603 | -66.3843 | 5.1516 |
| ligand094 | -80.8895 | -8.6034  | 3.3386 | -15.3471 | 8.3029 | -46.262  | 7.8501 | -65.011  | 8.1763 |
| ligand095 | -87.1492 | -20.7597 | 4.063  | -36.7515 | 7.265  | -61.6504 | 7.5989 | -69.4028 | 7.3934 |
| ligand096 | -80.9111 | -18.2057 | 1.9148 | -30.5269 | 4.8681 | -53.419  | 5.7195 | -59.662  | 6.0207 |
| ligand097 | -85.4636 | -15.8887 | 3.4289 | -32.772  | 6.5793 | -61.0028 | 6.817  | -70.9866 | 6.7329 |
| ligand098 | -74.7174 | -4.198   | 2.3627 | -15.8086 | 7.0646 | -45.4477 | 5.8645 | -61.5597 | 5.8244 |
| ligand099 | -84.762  | -21.7359 | 3.7688 | -34.2855 | 6.5189 | -61.2619 | 5.9332 | -69.3077 | 5.6314 |
| ligand100 | -85.1578 | -16.7638 | 5.1844 | -26.2968 | 7.1353 | -57.1865 | 6.721  | -71.4931 | 6.8926 |
| ligand101 | -73.0664 | -20.9238 | 3.2862 | -36.0391 | 6.085  | -51.4583 | 5.853  | -55.0031 | 5.725  |
| ligand102 | -84.2518 | -18.7434 | 2.5354 | -43.6682 | 5.6538 | -62.9308 | 5.236  | -67.3447 | 5.0781 |
| ligand103 | -80.2426 | -21.5851 | 2.0701 | -44.2868 | 4.9137 | -60.6321 | 5.3673 | -63.1258 | 5.475  |
| ligand104 | -80.1219 | -13.5356 | 2.8664 | -22.846  | 7.0693 | -49.916  | 6.7812 | -61.5265 | 5.9689 |
| ligand105 | -81.8418 | -23.4436 | 3.117  | -35.0458 | 6.0934 | -61.8025 | 7.5058 | -70.923  | 7.6539 |
| ligand106 | -71.8352 | -14.972  | 2.4996 | -24.6162 | 5.4058 | -50.4268 | 5.7759 | -58.925  | 5.6792 |
| ligand107 | -75.1139 | -16.2991 | 3.4494 | -40.0664 | 6.5667 | -55.544  | 6.2666 | -57.3268 | 6.5452 |
| ligand108 | -78.882  | -34.7452 | 3.2362 | -60.7638 | 5.4911 | -73.7405 | 5.719  | -75.5476 | 5.579  |
| ligand109 | -74.7711 | -13.8472 | 5.1593 | -34.0144 | 9.7196 | -57.5906 | 7.9753 | -62.9976 | 6.5391 |
| ligand110 | -77.4082 | -21.3521 | 4.0465 | -38.3368 | 6.1898 | -61.0979 | 6.6205 | -66.9008 | 6.0391 |
| ligand111 | -84.4923 | -11.8735 | 5.0382 | -27.6823 | 6.4689 | -55.0436 | 6.0845 | -64.0519 | 5.7262 |
| ligand112 | -85.7402 | -23.98   | 2.8534 | -36.761  | 6.48   | -60.8681 | 5.9286 | -67.6814 | 6.4864 |
| ligand113 | -81.4953 | -19.598  | 2.3998 | -33.009  | 5.1344 | -54.379  | 5.7234 | -61.1657 | 5.3397 |
| ligand114 | -81.6305 | -13.3197 | 3.0984 | -23.3112 | 5.8417 | -51.3172 | 6.5269 | -64.4208 | 7.1139 |
| ligand115 | -82.2377 | -18.1083 | 3.2334 | -29.3823 | 7.9517 | -57.5593 | 7.6455 | -67.6521 | 6.8277 |

|           |          |          |        |          |        |          |        |          |        |
|-----------|----------|----------|--------|----------|--------|----------|--------|----------|--------|
| ligand116 | -80.4904 | -13.3133 | 3.3869 | -25.4243 | 5.2418 | -55.6651 | 5.6155 | -66.6393 | 6.0124 |
|-----------|----------|----------|--------|----------|--------|----------|--------|----------|--------|

Table S50. Rac1 VS docking scores and Nwat-MMGBSA relative binding energies (kcal/mol) computed with Nwat = 0, 30, 60 and 100 (third repetition).

|           |               | Nwat=0     |         | Nwat=30    |         | Nwat=60    |         | Nwat=100   |         |
|-----------|---------------|------------|---------|------------|---------|------------|---------|------------|---------|
| ligand    | docking score | $\Delta G$ | St.Dev. | $\Delta G$ | St.Dev. | $\Delta G$ | St.Dev. | $\Delta G$ | St.Dev. |
| ligand001 | -71.7415      | -8.9597    | 4.2941  | -16.1394   | 8.0944  | -39.6799   | 7.7775  | -47.1612   | 7.8716  |
| ligand002 | -68.3504      | -18.0727   | 3.0762  | -29.6498   | 5.4539  | -47.3767   | 5.6246  | -53.0195   | 5.9917  |
| ligand003 | -73.6619      | -21.0608   | 2.9324  | -33.241    | 4.668   | -46.3265   | 4.3314  | -47.4072   | 3.9023  |
| ligand004 | -67.1401      | -1.1       | 2.0422  | 3.7685     | 7.159   | -24.8492   | 7.9823  | -43.0715   | 9.5557  |
| ligand005 | -75.0377      | -15.5798   | 3.1368  | -28.6243   | 6.0195  | -43.4172   | 5.4957  | -46.909    | 5.4852  |
| ligand006 | -82.2155      | -23.9284   | 3.3094  | -41.7877   | 5.9949  | -62.3903   | 6.3709  | -66.9694   | 6.2368  |
| ligand007 | -85.1276      | -17.6635   | 2.6691  | -37.7675   | 5.7928  | -61.0519   | 5.8101  | -67.9973   | 5.9051  |
| ligand008 | -83.3385      | -21.3834   | 2.2345  | -37.2027   | 5.668   | -55.1527   | 5.9495  | -57.4526   | 5.801   |
| ligand009 | -77.0482      | -23.1132   | 3.1398  | -50.0378   | 6.1607  | -56.7317   | 6.1235  | -54.5642   | 5.8811  |
| ligand010 | -62.3067      | -24.0568   | 2.1231  | -34.9979   | 4.399   | -44.5694   | 4.825   | -45.5734   | 4.6463  |
| ligand011 | -78.6126      | -13.0604   | 2.6356  | -31.8954   | 6.3345  | -49.0375   | 6.5183  | -51.8008   | 6.3418  |
| ligand012 | -77.2884      | -19.9707   | 3.1023  | -37.7755   | 6.02    | -50.1298   | 6.1391  | -50.4992   | 6.0101  |
| ligand013 | -77.1379      | -18.0764   | 2.8406  | -44.1464   | 4.8893  | -54.2691   | 5.2176  | -53.0218   | 5.1765  |
| ligand014 | -75.968       | -14.9286   | 2.3358  | -31.3885   | 5.1222  | -50.4862   | 5.5367  | -57.0378   | 5.4694  |
| ligand015 | -86.5134      | -14.0501   | 2.9536  | -47.7161   | 6.006   | -60.8423   | 5.8755  | -59.6143   | 5.7922  |
| ligand016 | -80.4469      | -15.2784   | 3.8596  | -30.8317   | 6.9942  | -52.2425   | 6.4916  | -59.8436   | 6.502   |
| ligand017 | -82.9034      | -6.8092    | 1.9518  | -46.3841   | 5.148   | -66.1214   | 5.4696  | -65.7654   | 5.8328  |
| ligand018 | -81.132       | -17.9786   | 2.4917  | -56.0412   | 6.8613  | -71.3911   | 6.9409  | -70.8831   | 6.6794  |
| ligand019 | -78.2265      | -1.4743    | 3.2418  | -2.6604    | 9.1212  | -32.9841   | 7.8859  | -47.491    | 7.3226  |
| ligand020 | -77.1055      | -22.5613   | 2.0588  | -35.8474   | 4.7389  | -54.6915   | 5.1818  | -60.3394   | 5.4334  |
| ligand021 | -77.5167      | -8.0712    | 2.5853  | -18.4839   | 6.4526  | -45.5201   | 6.1745  | -51.3988   | 6.2412  |
| ligand022 | -78.2031      | -11.6514   | 2.7243  | -26.3898   | 6.0532  | -45.1497   | 6.1367  | -49.7602   | 6.4578  |
| ligand023 | -76.9101      | -14.9178   | 3.0124  | -32.2291   | 5.8193  | -46.279    | 6.2269  | -47.6093   | 6.0136  |
| ligand024 | -71.9083      | -26.4521   | 3.256   | -49.317    | 5.1378  | -55.949    | 5.1644  | -55.007    | 5.1064  |
| ligand025 | -72.0578      | -27.8614   | 2.773   | -50.6684   | 5.8284  | -60.528    | 5.7403  | -60.5924   | 5.6684  |
| ligand026 | -72.1865      | -8.9018    | 2.4691  | -32.5614   | 6.2479  | -57.9546   | 5.5916  | -66.8869   | 5.4358  |
| ligand027 | -78.2589      | -12.717    | 3.1766  | -27.6948   | 7.1285  | -44.6504   | 6.1227  | -47.1641   | 6.1342  |
| ligand028 | -79.5939      | -15.0873   | 2.5918  | -32.1843   | 4.9536  | -52.4098   | 6.0449  | -56.2016   | 6.1705  |
| ligand029 | -80.2073      | -12.271    | 3.0231  | -27.6233   | 7.1227  | -47.4244   | 5.9055  | -50.181    | 5.2467  |
| ligand030 | -61.6397      | -4.4683    | 1.2462  | -30.736    | 5.0102  | -56.0166   | 6.694   | -60.5344   | 7.1577  |
| ligand031 | -67.4716      | -15.936    | 1.8894  | -37.8163   | 3.6766  | -43.5372   | 4.0326  | -42.7265   | 3.9036  |
| ligand032 | -78.4875      | -20.9583   | 3.5252  | -33.7171   | 6.8041  | -57.0038   | 7.39    | -65.1688   | 7.282   |
| ligand033 | -84.3289      | -14.7598   | 4.4773  | -30.0496   | 6.3858  | -56.6953   | 5.9752  | -66.4245   | 6.0314  |
| ligand034 | -76.474       | -11.6813   | 4.3066  | -24.3021   | 9.6176  | -44.435    | 5.6727  | -49.104    | 5.33    |

## Supplementary Material

|           |          |          |        |          |         |          |        |          |        |
|-----------|----------|----------|--------|----------|---------|----------|--------|----------|--------|
| ligand035 | -74.4373 | -18.7526 | 2.2608 | -48.3604 | 6.671   | -58.9892 | 6.4629 | -59.3404 | 6.561  |
| ligand036 | -67.1474 | -17.5935 | 2.628  | -32.2659 | 6.1594  | -59.5834 | 6.7101 | -69.1457 | 6.3503 |
| ligand037 | -80.3484 | -11.2677 | 5.7063 | -18.5178 | 10.5996 | -47.1588 | 8.2834 | -61.2276 | 5.8542 |
| ligand038 | -87.571  | -22.7392 | 2.2037 | -34.0836 | 4.8957  | -54.3334 | 6.3468 | -60.2035 | 6.3187 |
| ligand039 | -74.014  | -21.099  | 2.8226 | -26.9292 | 5.6922  | -50.1308 | 6.6337 | -59.7089 | 6.1661 |
| ligand040 | -72.2103 | -12.5675 | 1.9555 | -37.3565 | 4.3623  | -47.2846 | 4.1514 | -46.6746 | 3.9917 |
| ligand041 | -73.5971 | -15.4377 | 2.3532 | -39.0028 | 5.9063  | -51.0541 | 6.2003 | -51.1056 | 5.6677 |
| ligand042 | -70.2934 | -21.8307 | 2.0646 | -37.8831 | 3.8087  | -44.6641 | 3.8185 | -44.3806 | 3.7182 |
| ligand043 | -72.2481 | -16.5164 | 2.2226 | -32.0793 | 5.0104  | -46.1272 | 4.8767 | -47.4223 | 4.7374 |
| ligand044 | -78.3889 | -14.9782 | 3.4209 | -33.3173 | 5.1087  | -51.2838 | 5.4342 | -54.0254 | 5.4861 |
| ligand045 | -87.6346 | -21.1451 | 2.3555 | -52.4157 | 4.1705  | -59.9367 | 4.3593 | -58.8322 | 4.3649 |
| ligand046 | -86.0615 | -19.1707 | 5.8139 | -30.6957 | 8.9467  | -60.4015 | 7.4687 | -73.6268 | 7.2573 |
| ligand047 | -64.817  | -9.2363  | 4.4264 | -24.2564 | 8.6472  | -43.3006 | 6.3491 | -45.2954 | 5.6136 |
| ligand048 | -77.3175 | -4.2591  | 3.5992 | -36.1452 | 9.6042  | -61.1527 | 6.7145 | -65.1085 | 6.8567 |
| ligand049 | -83.3649 | -16.0614 | 4.1187 | -39.9374 | 7.4519  | -61.4344 | 6.9496 | -66.1316 | 6.3124 |
| ligand050 | -65.4188 | -17.0274 | 2.3836 | -24.5933 | 3.8187  | -30.3683 | 3.5697 | -30.1759 | 3.5237 |
| ligand051 | -79.9095 | -13.2998 | 2.2407 | -36.1002 | 6.3388  | -59.9616 | 5.5748 | -63.2255 | 4.8323 |
| ligand052 | -65.3917 | -33.1874 | 2.5987 | -47.5095 | 3.9828  | -50.0762 | 4.0695 | -49.5284 | 3.934  |
| ligand053 | -82.0577 | -23.0357 | 2.6494 | -39.4673 | 4.523   | -47.5157 | 4.6463 | -47.1575 | 4.4936 |
| ligand054 | -76.3067 | -11.6952 | 3.6132 | -20.0949 | 7.854   | -48.1909 | 6.702  | -61.1169 | 6.0904 |
| ligand055 | -82.6167 | -19.0614 | 2.621  | -30.8133 | 6.2637  | -55.5048 | 5.9203 | -63.6306 | 6.0858 |
| ligand056 | -78.6233 | -13.3021 | 2.4632 | -31.6668 | 5.2781  | -49.089  | 5.8396 | -51.8226 | 5.8137 |
| ligand057 | -75.6454 | -23.3731 | 3.1769 | -48.3949 | 4.8825  | -56.1346 | 5.0249 | -55.2695 | 5.067  |
| ligand058 | -67.1024 | -13.5949 | 2.4301 | -12.6192 | 4.637   | -22.7644 | 5.0508 | -24.5736 | 5.2809 |
| ligand059 | -61.8712 | -8.2381  | 1.7701 | -24.4865 | 4.793   | -30.7715 | 4.165  | -29.5806 | 4.0286 |
| ligand060 | -67.5879 | -22.3401 | 1.8789 | -34.8026 | 5.0124  | -61.3768 | 5.5549 | -70.176  | 5.4966 |
| ligand061 | -83.6679 | -11.4654 | 2.9506 | -21.097  | 7.0577  | -38.2263 | 6.9176 | -47.0625 | 7.8914 |
| ligand062 | -86.5678 | -13.5649 | 2.2764 | -27.6922 | 7.5614  | -53.6719 | 8.5043 | -63.9882 | 7.6221 |
| ligand063 | -72.438  | -16.4372 | 3.0769 | -30.8835 | 6.7913  | -52.8548 | 6.696  | -57.8153 | 6.4465 |
| ligand064 | -76.6989 | -10.5695 | 2.0098 | -35.2464 | 4.8025  | -58.0488 | 5.3445 | -64.6874 | 5.2694 |
| ligand065 | -84.3284 | -12.2971 | 2.1537 | -27.7829 | 5.6402  | -55.8435 | 6.26   | -66.0584 | 6.5115 |
| ligand066 | -63.9548 | -12.891  | 2.1068 | -26.4968 | 4.8794  | -36.7779 | 5.0124 | -37.2752 | 4.9091 |
| ligand067 | -85.3346 | -13.2715 | 3.1695 | -25.0109 | 6.1654  | -55.3131 | 7.0341 | -68.6551 | 7.11   |
| ligand068 | -76.3942 | -12.4757 | 2.2277 | -28.2712 | 5.4883  | -47.4993 | 5.9598 | -50.1545 | 5.8539 |
| ligand069 | -77.5062 | -13.8203 | 2.3614 | -29.2319 | 6.6741  | -47.1787 | 5.9795 | -49.0909 | 5.743  |
| ligand070 | -81.1354 | -20.0435 | 2.7794 | -39.2552 | 8.0966  | -55.4208 | 7.5381 | -59.0677 | 6.7334 |
| ligand071 | -83.6051 | -6.9547  | 3.7756 | -39.2183 | 12.881  | -58.4649 | 6.1745 | -60.9912 | 5.8508 |
| ligand072 | -79.8882 | -15.2813 | 2.7898 | -34.119  | 5.1959  | -48.7148 | 5.6857 | -49.629  | 5.6744 |
| ligand073 | -86.4123 | -22.3669 | 3.0557 | -32.5953 | 5.2729  | -62.5365 | 6.92   | -75.4655 | 7.0247 |
| ligand074 | -78.0962 | -24.1079 | 3.0765 | -48.7732 | 5.3557  | -54.4206 | 5.2502 | -53.173  | 5.264  |

## Supplementary Material

|           |          |          |        |          |         |          |         |          |         |
|-----------|----------|----------|--------|----------|---------|----------|---------|----------|---------|
| ligand075 | -91.653  | -26.2028 | 7.2432 | -30.0434 | 11.7156 | -58.011  | 8.2042  | -69.4469 | 7.0936  |
| ligand076 | -80.2663 | -15.0024 | 3.6866 | -35.7489 | 5.7856  | -58.6506 | 6.7928  | -65.0504 | 6.8109  |
| ligand077 | -85.7166 | -20.4936 | 2.5887 | -36.5691 | 4.7167  | -60.2905 | 5.4745  | -66.9769 | 5.8428  |
| ligand078 | -86.1872 | -20.5097 | 3.279  | -32.1342 | 7.8324  | -61.5804 | 6.7819  | -73.6826 | 6.7519  |
| ligand079 | -81.3117 | -5.437   | 2.2392 | -13.1098 | 7.145   | -44.6841 | 7.6663  | -60.5342 | 9.6057  |
| ligand080 | -82.863  | -13.8215 | 2.3675 | -29.7919 | 6.7601  | -59.8118 | 6.7471  | -71.7966 | 6.9413  |
| ligand081 | -78.9824 | -17.224  | 2.4577 | -34.8348 | 5.1793  | -55.7637 | 5.384   | -59.796  | 5.2344  |
| ligand082 | -83.3551 | -19.3592 | 2.4404 | -38.4278 | 5.8726  | -62.3802 | 6.1574  | -68.3365 | 5.8783  |
| ligand083 | -87.1379 | -22.4179 | 2.4039 | -30.7084 | 5.0465  | -60.7997 | 6.3091  | -75.4862 | 6.593   |
| ligand084 | -68.3554 | -18.328  | 1.8034 | -32.3393 | 3.5715  | -46.5055 | 4.3497  | -49.0976 | 4.3239  |
| ligand085 | -84.5862 | -22.2125 | 3.2967 | -37.8588 | 6.9177  | -59.9415 | 5.7895  | -65.4094 | 5.5246  |
| ligand086 | -82.6222 | -17.9239 | 3.3439 | -27.497  | 5.8456  | -53.0532 | 5.5471  | -63.4996 | 5.538   |
| ligand087 | -83.3434 | -17.4068 | 2.5189 | -35.3753 | 5.1797  | -51.8431 | 6.0272  | -52.8167 | 5.98    |
| ligand088 | -79.946  | -19.3814 | 3.0267 | -35.5588 | 5.0465  | -56.1775 | 5.796   | -60.6071 | 5.8855  |
| ligand089 | -68.0628 | -3.6896  | 3.8709 | -3.841   | 9.6933  | -33.2458 | 8.4834  | -49.352  | 6.4663  |
| ligand090 | -83.0351 | -23.4173 | 5.8778 | -42.6886 | 6.8342  | -65.2124 | 6.7368  | -71.1583 | 6.469   |
| ligand091 | -82.3608 | -12.1768 | 3.8418 | -22.0875 | 7.1169  | -47.911  | 6.6035  | -59.736  | 6.6515  |
| ligand092 | -82.2809 | -22.2177 | 2.3959 | -33.6584 | 5.6068  | -62.2318 | 6.1455  | -73.4483 | 6.494   |
| ligand093 | -84.6604 | -20.3024 | 2.7666 | -36.6295 | 6.4917  | -56.8971 | 6.3057  | -62.3678 | 6.3867  |
| ligand094 | -81.1758 | -14.6654 | 3.9188 | -23.9905 | 8.1579  | -52.1435 | 6.5101  | -64.3468 | 6.865   |
| ligand095 | -87.1433 | -4.7822  | 4.9093 | -2.6243  | 12.5217 | -34.3236 | 12.2088 | -59.7178 | 10.7184 |
| ligand096 | -80.8712 | -16.8106 | 2.3667 | -27.3488 | 6.1763  | -53.33   | 5.6651  | -62.572  | 5.8304  |
| ligand097 | -85.3986 | -23.0717 | 2.0927 | -41.6392 | 4.7273  | -64.9851 | 5.3587  | -71.7769 | 5.6952  |
| ligand098 | -78.811  | -21.7729 | 2.2751 | -45.0237 | 4.5406  | -48.4358 | 4.6098  | -46.8493 | 4.4854  |
| ligand099 | -84.8937 | -21.4887 | 2.88   | -38.0889 | 5.3476  | -62.8041 | 5.9234  | -70.1644 | 6.3934  |
| ligand100 | -85.2133 | -9.9992  | 2.6211 | -20.6194 | 7.426   | -55.3326 | 6.9395  | -73.3068 | 6.2016  |
| ligand101 | -73.02   | -15.3151 | 2.5434 | -26.0506 | 6.3296  | -47.0776 | 6.5132  | -54.6934 | 6.4068  |
| ligand102 | -84.2759 | -9.014   | 2.169  | -14.1963 | 6.9455  | -49.0968 | 7.0388  | -68.6318 | 7.4226  |
| ligand103 | -80.4194 | -6.9455  | 3.1335 | -24.6892 | 6.13    | -51.1377 | 6.2311  | -59.9371 | 6.195   |
| ligand104 | -79.525  | -10.1548 | 4.1887 | -15.7661 | 9.7685  | -48.8748 | 9.6149  | -65.0208 | 7.7302  |
| ligand105 | -81.7741 | -22.429  | 2.2283 | -32.0456 | 5.8213  | -61.758  | 5.4108  | -75.2277 | 5.6306  |
| ligand106 | -75.5161 | -25.1191 | 2.874  | -44.864  | 5.3537  | -59.5198 | 5.3658  | -61.8499 | 5.2445  |
| ligand107 | -76.4572 | -28.9998 | 2.6696 | -51.0571 | 4.7618  | -57.7913 | 5.1657  | -56.7699 | 5.2217  |
| ligand108 | -78.3836 | -32.7342 | 2.5066 | -60.5048 | 5.5197  | -75.237  | 5.6384  | -76.8255 | 5.4087  |
| ligand109 | -74.7477 | -8.2279  | 2.3418 | -21.038  | 4.9433  | -50.559  | 5.5159  | -62.2207 | 5.8269  |
| ligand110 | -78.9191 | -18.4215 | 2.2363 | -32.1737 | 4.6808  | -57.2315 | 5.5382  | -64.496  | 5.5084  |
| ligand111 | -84.4903 | -14.4218 | 4.6003 | -29.2163 | 6.2277  | -53.5945 | 6.9768  | -62.0004 | 7.4833  |
| ligand112 | -85.9739 | -13.2437 | 2.212  | -27.1276 | 6.5373  | -55.8116 | 6.69    | -67.222  | 6.837   |
| ligand113 | -81.508  | -13.1772 | 2.3343 | -36.6818 | 4.6899  | -57.4034 | 5.4101  | -62.6772 | 5.7731  |
| ligand114 | -81.8196 | -21.785  | 3.4323 | -36.4144 | 6.4024  | -63.4856 | 6.6958  | -71.9547 | 6.4151  |

Supplementary Material

|           |          |          |        |          |        |          |        |          |        |
|-----------|----------|----------|--------|----------|--------|----------|--------|----------|--------|
| ligand115 | -82.2579 | -18.2881 | 1.9181 | -28.4524 | 4.7547 | -53.8013 | 5.3744 | -62.8049 | 5.6943 |
| ligand116 | -80.3855 | -10.9686 | 3.3883 | -26.9702 | 6.4298 | -53.7378 | 6.5129 | -62.839  | 6.7104 |
